# Supplementary material for: Chiral diene-promoted room temperature conjugate arylation: highly enantioselective synthesis of substituted chiral phenylalanine derivatives and α,α-di(arylmethyl)acetates
Source: Royal Society of Chemistry journal article supplement (doi:10.1039/d0ob00616e), 2020-01-01

Supplementary Information:

**Chiral diene-promoted room temperature conjugate arylation:  
highly enantioselective synthesis of substituted chiral phenylalanine  
derivatives and  $\alpha,\alpha$ -di(arylmethyl)acetates**

Jian-Ping Chen<sup>†</sup> and Ming-Hua Xu<sup>\*,†,‡</sup>

<sup>†</sup>State Key Laboratory of Drug Research, Shanghai Institute of Materia Medica, Chinese Academy of Sciences, 555  
Zuchongzhi Road, Shanghai 201203, China.

<sup>‡</sup>Shenzhen Key Laboratory of Discovery and Synthesis of Small Molecule Drugs, Department of Chemistry,  
Southern University of Science and Technology, 1088 Xueyuan Blvd., Shenzhen 518055, China.

E-mail: xumh@simm.ac.cn; xumh@sustech.edu.cn

|                                                                                                                                              |    |
|----------------------------------------------------------------------------------------------------------------------------------------------|----|
| 1. General.....                                                                                                                              | 2  |
| 2. General procedure for Rh-catalyzed 1,4-addition/asymmetric protonation of $\alpha$ -<br>phthalylimide tert-butyl acrylate <b>1a</b> ..... | 2  |
| 3. Characterization data and HPLC of products <b>3</b> .....                                                                                 | 3  |
| 4. Deuterium labeling experiment of phenylalanine product <b>3</b> .....                                                                     | 19 |
| 5. General procedure for Rh-catalyzed asymmetric 1,4-addition/asymmetric<br>protonation of acrylate substrates <b>4</b> .....                | 20 |
| 6. Characterization data and HPLC of products <b>5</b> .....                                                                                 | 21 |
| 7. Construction of compound <b>7</b> .....                                                                                                   | 39 |
| 8. Copies of <sup>1</sup> H NMR and <sup>13</sup> C NMR spectra of products <b>3-7</b> .....                                                 | 41 |

## 1. General

All anaerobic and moisture-sensitive manipulations were carried out with standard Schlenk techniques under predried nitrogen or argon. Solvents were dried and distilled by standard procedures. NMR spectra were recorded on a Mercury 300 spectrometer (300 MHz for  $^1\text{H}$ ), and Varian spectrometer (400 MHz or 600 MHz for  $^1\text{H}$ , 125 MHz or 150 MHz for  $^{13}\text{C}$ ). Chemical shifts are reported in  $\delta$  (ppm) referenced to an internal  $\text{SiMe}_4$  standard or the residual peak of methanol- $d_4$  ( $\delta$  3.31), dimethyl sulfoxide- $d_6$  ( $\delta$  2.50) for  $^1\text{H}$  NMR, and chloroform- $d$  ( $\delta$  77.16), methanol- $d_4$  ( $\delta$  49.00) for  $^{13}\text{C}$  NMR. Optical rotations were measured on a Perkin-Elmer 241 MC polarimeter. HPLC was performed on a JASCO 2000 instrument by using Daicel columns with 2-propanol/hexane as the eluent.

## 2. General procedure for Rh-catalyzed 1,4-addition/asymmetric protonation of $\alpha$ -phthalylimide *tert*-butyl acrylate **1a**

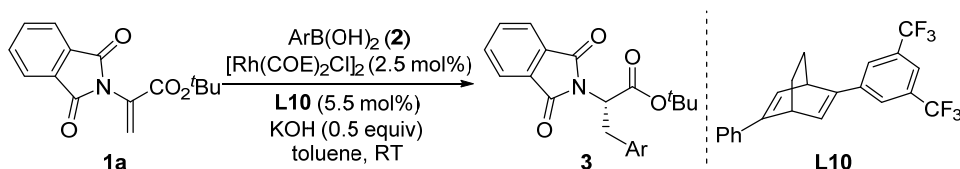

Under Ar atmosphere, a solution of  $\alpha$ -phthalylimide *tert*-butyl acrylate **1a** (0.1 mmol), arylboronic acid **2** (0.3 mmol),  $[\text{Rh}(\text{COE})_2\text{Cl}]_2$  (1.8 mg, 0.005 mmol of Rh), **L10** (2.2 mg, 0.0055 mmol) in 1.0 mL of anhydrous toluene was stirred at room temperature for 30 min. To this mixture was added KOH (0.05 mL, 1.0 M, 0.05 mmol). After reaction for another 12 hours, a saturated aq.  $\text{NH}_4\text{Cl}$  was added and the mixture was extracted with EtOAc (10 mL $\times$ 3). The combined organic phase was dried over  $\text{Na}_2\text{SO}_4$ , filtered, and concentrated. The residue was purified by silica gel flash chromatography, eluting with petroleum ether/EtOAc (20%-30% EtOAc), to afford the corresponding products **3**.

### 3. Characterization data and HPLC of products 3

#### *tert*-butyl (*S*)-2-(1,3-dioxisoindolin-2-yl)-3-(4-methoxyphenyl)propanoate (**3a**)

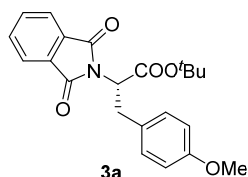

99% yield, colorless oil, 94% ee.

$^1\text{H}$  NMR (300 MHz,  $\text{CDCl}_3$ ):  $\delta$  7.75 (dd,  $J = 5.1, 3.2$  Hz, 2H), 7.67-7.54 (m, 2H), 7.05 (d,  $J = 8.4$  Hz, 2H), 6.78-6.57 (m, 2H), 5.00 (dd,  $J = 9.6, 7.0$  Hz, 1H), 3.70 (s, 3H), 3.56-3.37 (m, 2H), 1.43 (s, 9H).  $^{13}\text{C}$  NMR (150 MHz,  $\text{CDCl}_3$ ):  $\delta$  167.9, 167.7, 158.3, 134.0, 131.7, 129.8, 129.1, 123.4, 113.9, 82.7, 55.1, 54.3, 33.8, 27.9. HRMS (ESI) for  $\text{C}_{22}\text{H}_{23}\text{NNaO}_5$   $[\text{M}+\text{Na}]^+$ : calcd 404.1474, found 404.1468.

HPLC: Chiralpak IC column (250 mm); detected at 224 nm; *n*-hexane/*i*-propanol = 95/5; flow = 0.7 mL/min; Retention time: 15.9 min, 17.9 min (major).

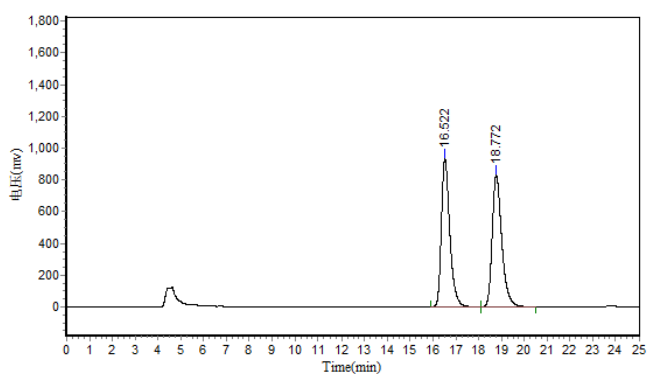

Results

| Peak No.     | Peak ID | Ret Time | Height      | Area         | Conc.    |
|--------------|---------|----------|-------------|--------------|----------|
| 1            |         | 16.522   | 932769.375  | 23978046.000 | 49.6586  |
| 2            |         | 18.772   | 829777.188  | 24307766.000 | 50.3414  |
| <b>Total</b> |         |          | 1762546.563 | 48285812.000 | 100.0000 |

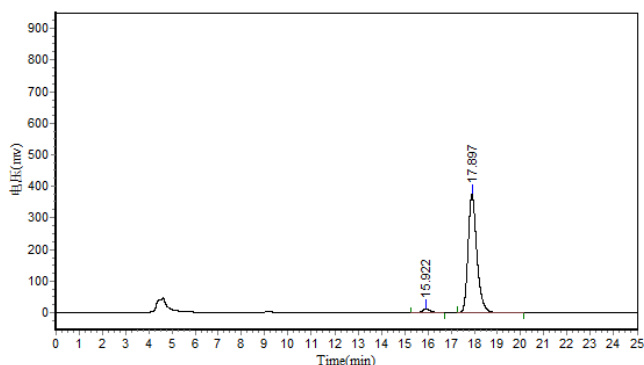

Results

| Peak No.     | Peak ID | Ret Time | Height     | Area         | Conc.    |
|--------------|---------|----------|------------|--------------|----------|
| 1            |         | 15.922   | 13112.486  | 308711.688   | 2.9974   |
| 2            |         | 17.897   | 375600.188 | 9990632.000  | 97.0026  |
| <b>Total</b> |         |          | 388712.674 | 10299343.688 | 100.0000 |

***tert*-butyl (*S*)-2-(1,3-dioxisoindolin-2-yl)-3-(*p*-tolyl)propanoate (**3d**)**

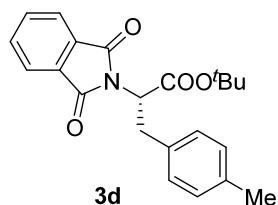

99% yield, colorless oil, 95% ee.

$^1\text{H}$  NMR (300 MHz,  $\text{CDCl}_3$ ):  $\delta$  7.78 (dt,  $J = 7.1, 2.7$  Hz, 2H), 7.68 (dt,  $J = 5.6, 3.5$  Hz, 2H), 7.04 (t,  $J = 8.2$  Hz, 2H), 6.99 (d,  $J = 8.0$  Hz, 2H), 5.06 (dd,  $J = 9.8, 6.8$  Hz, 1H),

3.51 (dd,  $J = 12.0, 5.4$  Hz, 2H), 2.22 (s, 3H), 1.46 (s, 9H).  $^{13}\text{C}$  NMR (150 MHz,  $\text{CDCl}_3$ ):  $\delta$  167.9, 167.7, 136.2, 134.0, 131.7, 129.2, 128.7, 123.4, 82.8, 54.3, 34.2, 27.9, 21.0.

HRMS (ESI) for  $\text{C}_{22}\text{H}_{23}\text{NNaO}_4$   $[\text{M}+\text{Na}]^+$ : calcd 388.1525, found 388.1517.

HPLC: Chiralpak AD-3 column (250 mm); detected at 224 nm; *n*-hexane/*i*-propanol = 95/5; flow = 0.7 mL/min; Retention time: 12.9 min (major), 18.6 min.

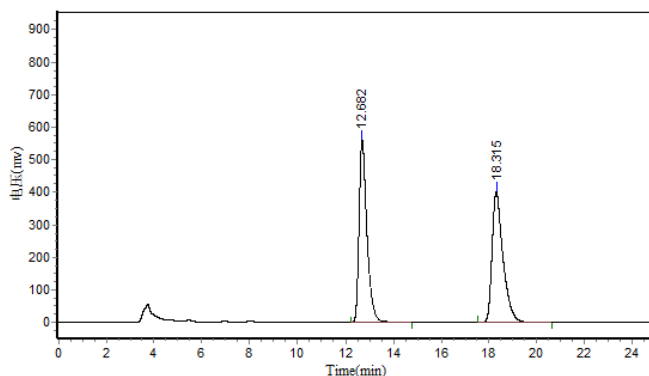

**Results**

| Peak No.     | Peak ID | Ret Time | Height     | Area         | Conc.    |
|--------------|---------|----------|------------|--------------|----------|
| 1            |         | 12.682   | 556372.875 | 12857949.000 | 50.1231  |
| 2            |         | 18.315   | 401100.781 | 12794789.000 | 49.8769  |
| <b>Total</b> |         |          | 957473.656 | 25652738.000 | 100.0000 |

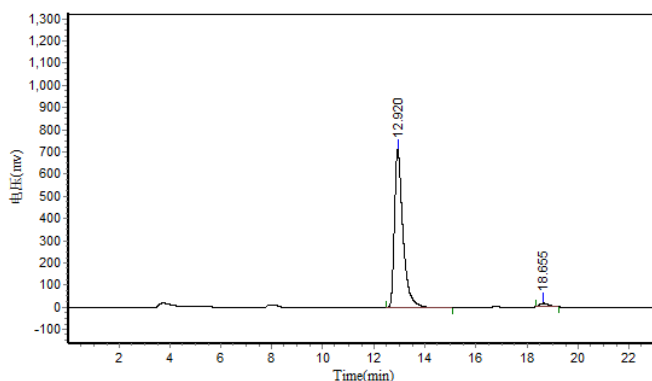

**Results**

| Peak No.     | Peak ID | Ret Time | Height     | Area         | Conc.    |
|--------------|---------|----------|------------|--------------|----------|
| 1            |         | 12.920   | 711555.188 | 16445455.000 | 97.4612  |
| 2            |         | 18.655   | 16265.929  | 428398.094   | 2.5388   |
| <b>Total</b> |         |          | 727821.116 | 16873853.094 | 100.0000 |

***tert*-butyl (*S*)-3-(4-(*tert*-butyl)phenyl)-2-(1,3-dioxisoindolin-2-yl)propanoate (**3e**)**

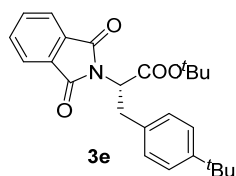

97% yield, colorless oil, 97% ee.

$^1\text{H}$  NMR (300 MHz,  $\text{CDCl}_3$ ):  $\delta$  7.78 (dt,  $J = 7.5, 3.8$  Hz, 2H), 7.74-7.59 (m, 2H), 7.21 (d,  $J = 8.2$  Hz, 2H), 7.10 (d,  $J = 8.2$  Hz, 2H), 5.09 (dd,  $J = 9.5, 6.8$  Hz, 1H), 3.51 (dd,  $J = 13.8,$

10.7 Hz, 2H), 1.45 (s, 9H), 1.20 (s, 9H).  $^{13}\text{C}$  NMR (150 MHz,  $\text{CDCl}_3$ ):  $\delta$  168.0, 167.8, 149.4, 134.0, 133.9, 131.8, 128.4, 125.4, 123.3, 82.7, 54.1, 34.4, 34.1, 31.3, 27.9.

HRMS (ESI) for  $\text{C}_{25}\text{H}_{29}\text{NNaO}_4$   $[\text{M}+\text{Na}]^+$ : calcd 430.1994, found 430.1990.

HPLC: Chiralpak AD-H column (250 mm); detected at 224 nm; *n*-hexane/*i*-propanol = 95/5; flow = 1.0 mL/min; Retention time: 10.4 min (major), 12.5 min.

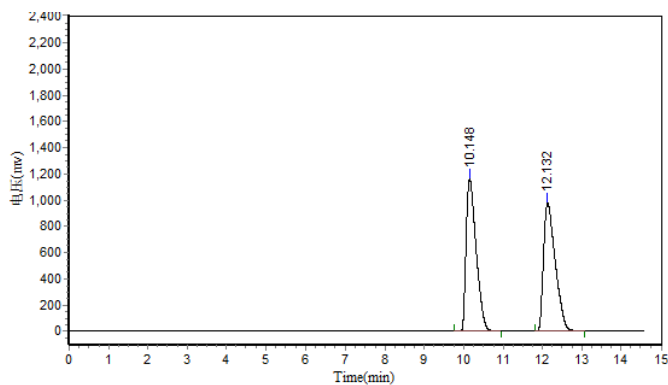

| Results      |         |          |             |              |          |
|--------------|---------|----------|-------------|--------------|----------|
| Peak No.     | Peak ID | Ret Time | Height      | Area         | Conc.    |
| 1            |         | 10.148   | 1161167.625 | 20597112.000 | 50.2671  |
| 2            |         | 12.132   | 977401.125  | 20378242.000 | 49.7329  |
| <b>Total</b> |         |          | 2138568.750 | 40975354.000 | 100.0000 |

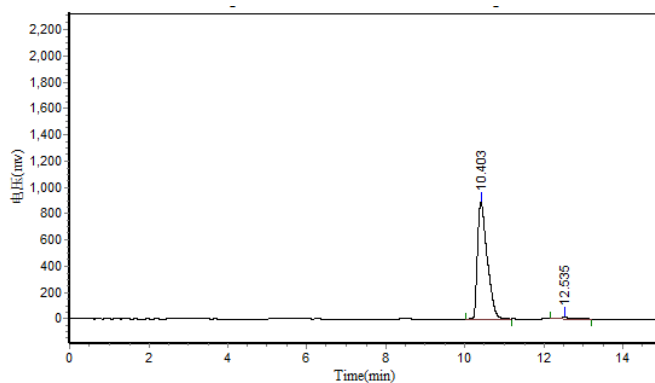

| Results      |         |          |            |              |          |
|--------------|---------|----------|------------|--------------|----------|
| Peak No.     | Peak ID | Ret Time | Height     | Area         | Conc.    |
| 1            |         | 10.403   | 890699.813 | 15209188.000 | 98.5707  |
| 2            |         | 12.535   | 10509.735  | 220530.109   | 1.4293   |
| <b>Total</b> |         |          | 901209.548 | 15429718.109 | 100.0000 |

***tert*-butyl (*S*)-2-(1,3-dioxisoindolin-2-yl)-3-(4-fluorophenyl)propanoate (**3f**)**

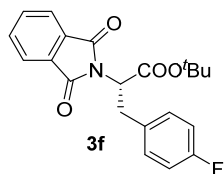

99% yield, colorless oil, 90% ee.

$^1\text{H}$  NMR (300 MHz,  $\text{CDCl}_3$ ):  $\delta$  7.89-7.73 (m, 2H), 7.69 (dd,  $J = 6.2, 2.2$  Hz, 2H), 7.18-6.99 (m, 2H), 6.86 (t,  $J = 8.1$  Hz, 2H), 5.03 (dd,  $J = 8.8, 6.7$  Hz, 1H), 3.48 (dd,  $J = 14.1, 10.6$  Hz, 2H), 1.43 (s, 9H).  $^{13}\text{C}$  NMR (150 MHz,  $\text{CDCl}_3$ ):  $\delta$  167.7, 167.6, 161.3 (d,  $J_{\text{CF}} = 291$  Hz), 134.1, 132.8, 131.6, 130.3 (d,  $J_{\text{CF}} = 11$  Hz), 123.5, 115.4 (d,  $J_{\text{CF}} = 24$  Hz), 82.9, 54.1, 33.9, 27.9. HRMS (ESI) for  $\text{C}_{21}\text{H}_{20}\text{FNNaO}_4$   $[\text{M}+\text{Na}]^+$ : calcd 392.1274, found 392.1268.

HPLC: Chiralpak AD-3 column (250 mm); detected at 224 nm; *n*-hexane/*i*-propanol = 95/5; flow = 0.7 mL/min; Retention time: 9.9 min (major), 15.5 min.

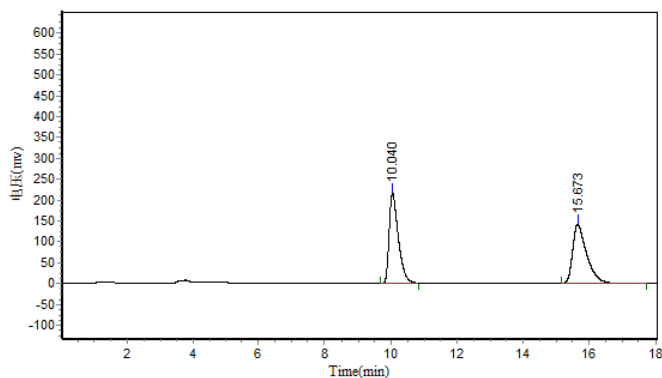

| Results      |         |          |            |             |          |
|--------------|---------|----------|------------|-------------|----------|
| Peak No.     | Peak ID | Ret Time | Height     | Area        | Conc.    |
| 1            |         | 10.040   | 215721.984 | 4212422.000 | 49.9140  |
| 2            |         | 15.673   | 141787.453 | 4226931.000 | 50.0860  |
| <b>Total</b> |         |          | 357509.438 | 8439353.000 | 100.0000 |

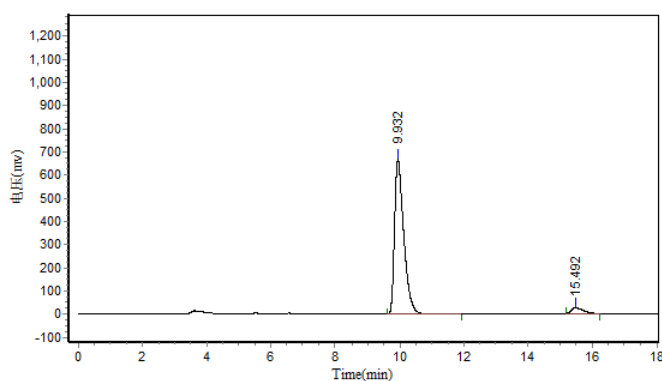

| Results      |         |          |            |              |          |
|--------------|---------|----------|------------|--------------|----------|
| Peak No.     | Peak ID | Ret Time | Height     | Area         | Conc.    |
| 1            |         | 9.932    | 667817.125 | 13328599.000 | 95.0847  |
| 2            |         | 15.492   | 25326.398  | 688999.875   | 4.9152   |
| <b>Total</b> |         |          | 693143.523 | 14017598.875 | 100.0000 |

***tert*-butyl (*S*)-3-(4-chlorophenyl)-2-(1,3-dioxisoindolin-2-yl)propanoate (**3g**)**

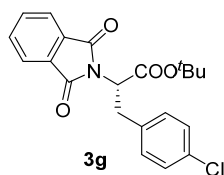

93% yield, colorless oil, 91% ee.

$^1\text{H}$  NMR (300 MHz,  $\text{CDCl}_3$ ):  $\delta$  7.75 (s, 2H), 7.68 (s, 2H), 7.10

(dd,  $J = 17.5, 8.3$  Hz, 4H), 5.08-4.92 (m, 1H), 3.48 (d,  $J = 8.1$

Hz, 2H), 1.42 (s, 9H).  $^{13}\text{C}$  NMR (150 MHz,  $\text{CDCl}_3$ ):  $\delta$  167.7, 167.6, 135.7, 134.2, 132.6, 131.6, 130.2, 128.7, 123.5, 83.0, 53.9, 34.1, 27.9. HRMS (ESI) for  $\text{C}_{21}\text{H}_{20}\text{ClNNaO}_4$   $[\text{M}+\text{Na}]^+$ : calcd 408.0979, found 408.0968.

HPLC: Chiralpak AD-3 column (250 mm); detected at 224 nm; *n*-hexane/*i*-propanol = 95/5; flow = 0.7 mL/min; Retention time: 11.0 min (major), 16.5 min.

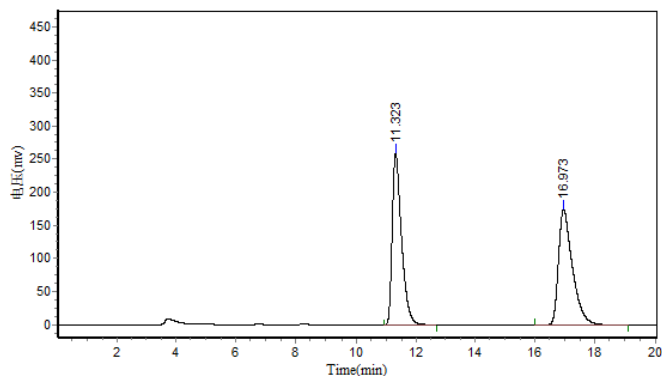

Results

| Peak No.     | Peak ID | Ret Time | Height     | Area         | Conc.    |
|--------------|---------|----------|------------|--------------|----------|
| 1            |         | 11.323   | 258438.391 | 5607319.500  | 49.7523  |
| 2            |         | 16.973   | 174505.219 | 5663161.500  | 50.2477  |
| <b>Total</b> |         |          | 432943.609 | 11270481.000 | 100.0000 |

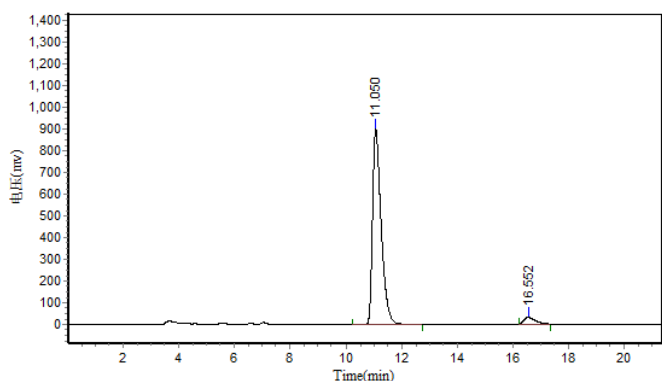

Results

| Peak No.     | Peak ID | Ret Time | Height     | Area         | Conc.    |
|--------------|---------|----------|------------|--------------|----------|
| 1            |         | 11.050   | 896427.438 | 19367386.000 | 95.6812  |
| 2            |         | 16.552   | 30098.697  | 874204.813   | 4.3189   |
| <b>Total</b> |         |          | 926526.135 | 20241590.813 | 100.0000 |

***tert*-butyl (S)-3-(4-bromophenyl)-2-(1,3-dioxisoindolin-2-yl)propanoate (3h)**

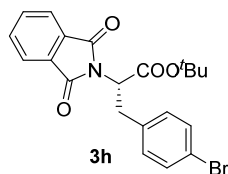

93% yield, colorless oil, 95% ee.

$^1\text{H}$  NMR (300 MHz,  $\text{CDCl}_3$ ):  $\delta$  7.79 (dd,  $J = 5.2, 3.2$  Hz, 2H), 7.70 (dd,  $J = 5.6, 3.0$  Hz, 2H), 7.31 (d,  $J = 7.4$  Hz, 2H), 7.05 (d,  $J = 8.2$  Hz, 2H), 5.04 (m, 1H), 3.50 (d,  $J = 8.1$  Hz, 2H),

1.45 (s, 9H).  $^{13}\text{C}$  NMR (150 MHz,  $\text{CDCl}_3$ ):  $\delta$  167.7, 167.6, 136.2, 134.2, 131.7, 131.6, 130.6, 123.5, 120.7, 83.0, 53.8, 34.2, 27.9. HRMS (ESI) for  $\text{C}_{21}\text{H}_{20}\text{BrNNaO}_4$   $[\text{M}+\text{Na}]^+$ : calcd 452.0473, found 452.0476.

HPLC: Chiralpak AD-3 column (250 mm); detected at 224 nm; *n*-hexane/*i*-propanol = 95/5; flow = 0.7 mL/min; Retention time: 17.0 min (major), 26.2 min.

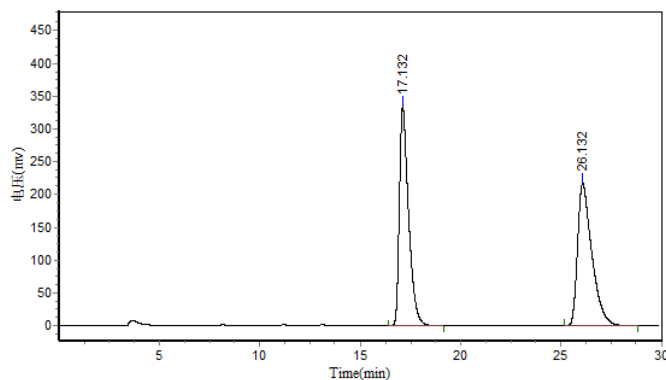

**Results**

| Peak No.     | Peak ID | Ret Time | Height     | Area         | Conc.    |
|--------------|---------|----------|------------|--------------|----------|
| 1            |         | 17.132   | 334852.688 | 10691557.000 | 49.7633  |
| 2            |         | 26.132   | 217304.188 | 10793266.000 | 50.2367  |
| <b>Total</b> |         |          | 552156.875 | 21484823.000 | 100.0000 |

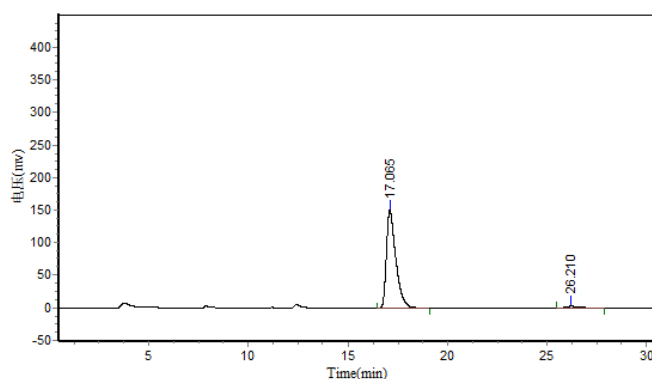

**Results**

| Peak No.     | Peak ID | Ret Time | Height     | Area        | Conc.    |
|--------------|---------|----------|------------|-------------|----------|
| 1            |         | 17.065   | 151024.797 | 4926689.500 | 97.4707  |
| 2            |         | 26.210   | 2631.797   | 127844.102  | 2.5293   |
| <b>Total</b> |         |          | 153656.594 | 5054533.602 | 100.0000 |



***tert*-butyl (*S*)-2-(1,3-dioxisoindolin-2-yl)-3-(4-(trifluoromethyl)phenyl)propanoate (**3i**)**

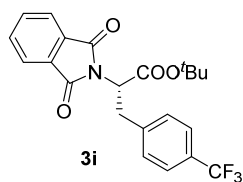

99% yield, colorless oil, 90% ee.

$^1\text{H NMR}$  (300 MHz,  $\text{CDCl}_3$ ):  $\delta$  7.79 (dt,  $J = 7.1, 3.5$  Hz, 2H), 7.74-7.68 (m, 2H), 7.44 (t,  $J = 8.0$  Hz, 2H), 7.30 (d,  $J = 8.1$  Hz, 2H), 5.10 (dd,  $J = 9.4, 7.2$  Hz, 1H), 3.65-3.49 (m, 2H), 1.45 (s, 9H).  $^{13}\text{C NMR}$  (125 MHz,  $\text{CDCl}_3$ ):  $\delta$  167.7, 167.5, 141.4, 134.2, 131.5, 129.2, 129.0 (q,  $J_{\text{CF}} = 32.5$  Hz), 125.5 (q,  $J_{\text{CF}} = 4.2$  Hz), 124.5 (q,  $J_{\text{CF}} = 270$  Hz), 123.5, 83.2, 53.7, 34.6, 27.9. HRMS (ESI) for  $\text{C}_{22}\text{H}_{20}\text{F}_3\text{NNaO}_4$   $[\text{M}+\text{Na}]^+$ : calcd 442.1242, found 442.1240.

HPLC: Chiralpak IC column (250 mm); detected at 224 nm; *n*-hexane/*i*-propanol = 95/5; flow = 0.7 mL/min; Retention time: 13.4 min, 15.6 min (major).

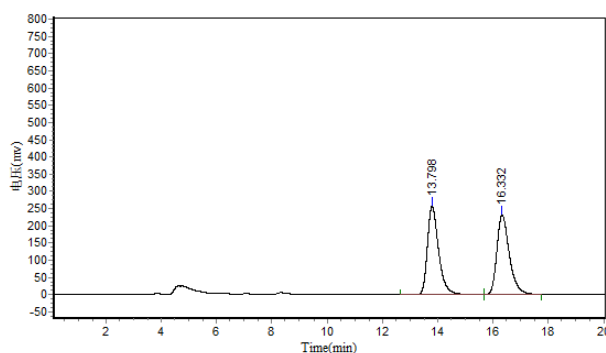

| Results      |         |          |            |              |          |
|--------------|---------|----------|------------|--------------|----------|
| Peak No.     | Peak ID | Ret Time | Height     | Area         | Conc.    |
| 1            |         | 13.798   | 257018.875 | 7253085.000  | 49.7479  |
| 2            |         | 16.332   | 230986.000 | 7326583.000  | 50.2521  |
| <b>Total</b> |         |          | 488004.875 | 14579668.000 | 100.0000 |

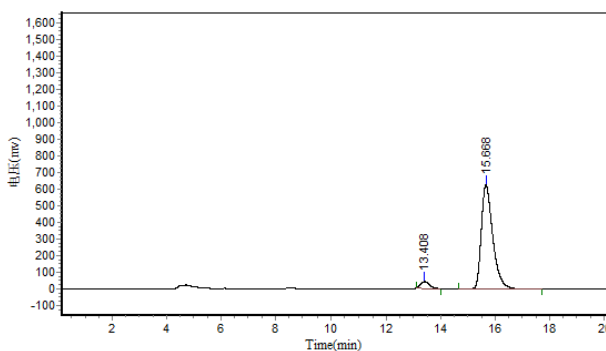

| Results      |         |          |            |              |          |
|--------------|---------|----------|------------|--------------|----------|
| Peak No.     | Peak ID | Ret Time | Height     | Area         | Conc.    |
| 1            |         | 13.408   | 40447.207  | 942301.438   | 4.8922   |
| 2            |         | 15.668   | 624965.438 | 18319196.000 | 95.1078  |
| <b>Total</b> |         |          | 665412.645 | 19261497.438 | 100.0000 |

***tert*-butyl (*S*)-3-([1,1'-biphenyl]-4-yl)-2-(1,3-dioxisoindolin-2-yl)propanoate (**3j**)**

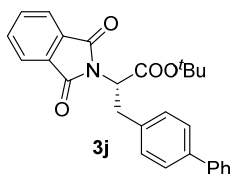

93% yield, colorless oil, 97% ee.

$^1\text{H}$  NMR (300 MHz,  $\text{CDCl}_3$ ):  $\delta$  7.79 (dt,  $J = 7.5, 3.7$  Hz, 2H), 7.68 (dd,  $J = 5.3, 2.1$  Hz, 2H), 7.58-7.35 (m, 6H), 7.27 (t,  $J = 7.6$  Hz, 3H), 5.15 (t,  $J = 8.3$  Hz, 1H), 3.61 (d,  $J = 8.8$  Hz, 2H), 1.48 (s, 9H).  $^{13}\text{C}$  NMR (125MHz,  $\text{CDCl}_3$ ):  $\delta$  167.9, 167.8, 140.7, 139.5, 136.2, 134.1, 131.7, 129.3, 128.7, 127.2, 126.9, 123.9, 123.4, 82.9, 54.1, 34.4, 27.9. HRMS (ESI) for  $\text{C}_{27}\text{H}_{25}\text{NNaO}_4$   $[\text{M}+\text{Na}]^+$ : calcd 450.1681, found 442.1674.

HPLC: Chiralpak AD-3 column (250 mm); detected at 224 nm; *n*-hexane/*i*-propanol = 95/5; flow = 0.7 mL/min; Retention time: 16.4 min (major), 28.8 min.

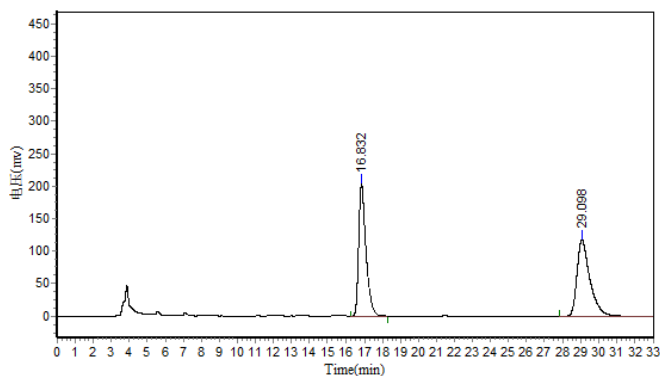

| Results      |         |          |            |              |          |
|--------------|---------|----------|------------|--------------|----------|
| Peak No.     | Peak ID | Ret Time | Height     | Area         | Conc.    |
| 1            |         | 16.832   | 202801.094 | 5771444.500  | 49.5610  |
| 2            |         | 29.098   | 117585.430 | 5873678.500  | 50.4390  |
| <b>Total</b> |         |          | 320386.523 | 11645123.000 | 100.0000 |

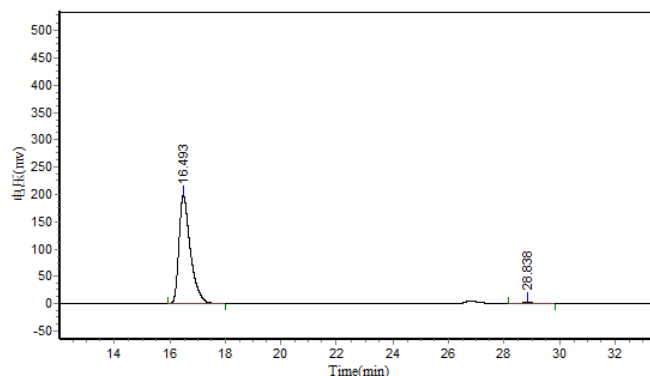

| Results      |         |          |            |             |          |
|--------------|---------|----------|------------|-------------|----------|
| Peak No.     | Peak ID | Ret Time | Height     | Area        | Conc.    |
| 1            |         | 16.493   | 198489.250 | 5685311.000 | 98.3933  |
| 2            |         | 28.838   | 2179.165   | 92835.102   | 1.6067   |
| <b>Total</b> |         |          | 200668.415 | 5778146.102 | 100.0000 |

***tert*-butyl (*S*)-2-(1,3-dioxisoindolin-2-yl)-3-(4-(methoxymethyl)phenyl)propanoate (**3k**)**

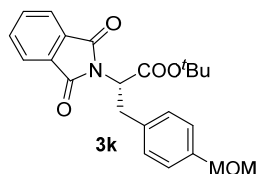

95% yield, colorless oil, 95% ee.

$^1\text{H NMR}$  (300 MHz,  $\text{CDCl}_3$ ):  $\delta$  7.78 (dt,  $J = 7.1, 3.5$  Hz, 2H), 7.72-7.66 (m, 2H), 7.08 (d,  $J = 8.6$  Hz, 2H), 6.85 (d,  $J = 8.6$  Hz, 2H), 5.09-4.98 (m, 3H), 3.49 (d,  $J = 6.7$  Hz, 2H), 3.41 (s, 3H), 1.45 (s, 9H).  $^{13}\text{C NMR}$  (150 MHz,  $\text{CDCl}_3$ ):  $\delta$  168.0, 167.8, 156.0, 134.1, 131.8, 130.6, 129.9, 123.5, 116.4, 94.6, 82.8, 56.0, 54.4, 33.9, 28.0. HRMS (ESI) for  $\text{C}_{23}\text{H}_{25}\text{NNaO}_5$   $[\text{M}+\text{Na}]^+$ : calcd 418.1630, found 418.1629.

HPLC: Chiralpak AD-H column (250 mm); detected at 224 nm; *n*-hexane/*i*-propanol = 90/10; flow = 0.7 mL/min; Retention time: 12.5 min (major), 15.2 min.

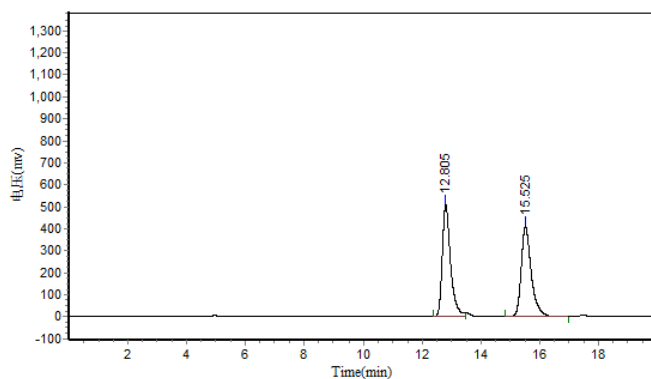

Results

| Peak No.     | Peak ID | Ret Time | Height     | Area         | Conc.    |
|--------------|---------|----------|------------|--------------|----------|
| 1            |         | 12.805   | 506825.906 | 9999668.000  | 49.7893  |
| 2            |         | 15.525   | 409489.219 | 9885955.000  | 49.2231  |
| <b>Total</b> |         |          | 923561.003 | 20083975.375 | 100.0000 |

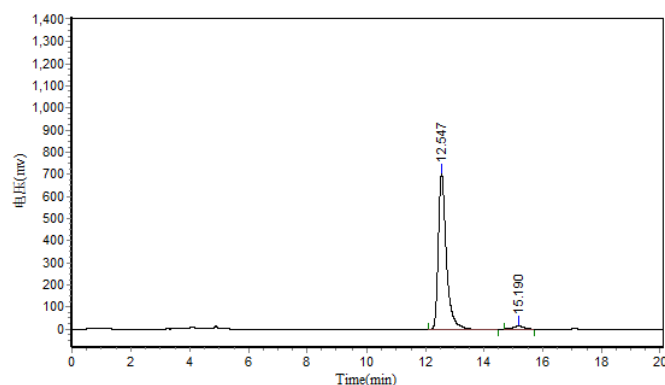

Results

| Peak No.     | Peak ID | Ret Time | Height     | Area         | Conc.    |
|--------------|---------|----------|------------|--------------|----------|
| 1            |         | 12.547   | 702695.813 | 13368232.000 | 97.5608  |
| 2            |         | 15.190   | 13034.164  | 334230.250   | 2.4392   |
| <b>Total</b> |         |          | 715729.977 | 13702462.250 | 100.0000 |

**tert-butyl (S)-2-(1,3-dioxisoindolin-2-yl)-3-phenylpropanoate (3I)**

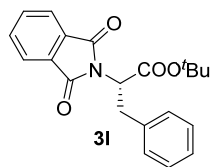

99% yield, colorless oil, 90% ee.

$^1\text{H}$  NMR (300 MHz,  $\text{CDCl}_3$ ):  $\delta$  7.77 (td,  $J = 5.3, 2.0$  Hz, 2H), 7.71-7.63 (m, 2H), 7.34-7.05 (m, 5H), 5.08 (dd,  $J = 10.5, 6.1$  Hz, 1H), 3.65-3.42 (m, 2H), 1.45 (s, 9H).  $^{13}\text{C}$  NMR (150 MHz,  $\text{CDCl}_3$ ):  $\delta$  167.9, 167.7, 137.2, 134.0, 131.7, 128.8, 128.5, 126.7, 123.4, 82.8, 54.2, 34.7, 27.9. HRMS (ESI) for  $\text{C}_{21}\text{H}_{21}\text{NNaO}_4$   $[\text{M}+\text{Na}]^+$ : calcd 374.1368, found 374.1363.

HPLC: Chiralpak AD-H column (250 mm); detected at 224 nm; *n*-hexane/*i*-propanol = 95/5; flow = 0.7 mL/min; Retention time: 9.3 min (major), 12.9 min.

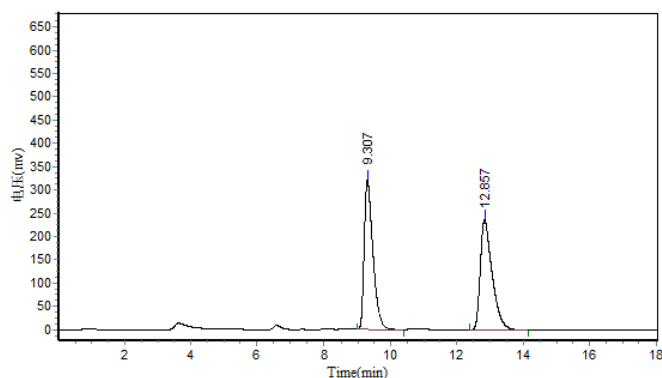

Results

| Peak No.     | Peak ID | Ret Time | Height     | Area         | Conc.    |
|--------------|---------|----------|------------|--------------|----------|
| 1            |         | 9.307    | 319899.688 | 5950452.000  | 50.1580  |
| 2            |         | 12.857   | 236853.063 | 5912961.000  | 49.8420  |
| <b>Total</b> |         |          | 556752.750 | 11863413.000 | 100.0000 |

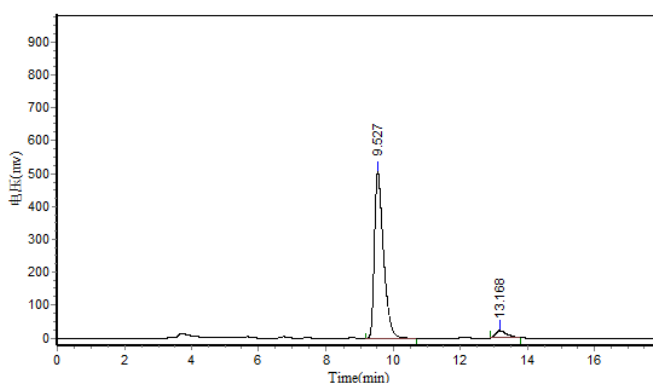

Results

| Peak No.     | Peak ID | Ret Time | Height     | Area         | Conc.    |
|--------------|---------|----------|------------|--------------|----------|
| 1            |         | 9.527    | 506074.031 | 9557676.000  | 94.9159  |
| 2            |         | 13.168   | 21810.477  | 511951.719   | 5.0841   |
| <b>Total</b> |         |          | 527884.508 | 10069627.719 | 100.0000 |

***tert*-butyl (*S*)-2-(1,3-dioxisoindolin-2-yl)-3-(3-methoxyphenyl)propanoate (**3m**)**

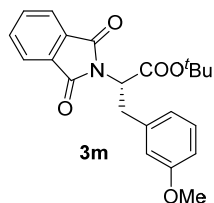

99% yield, colorless oil, 95% ee.

<sup>1</sup>H NMR (300 MHz, CDCl<sub>3</sub>): δ 7.82-7.75 (m, 2H), 7.74-7.64 (m, 2H), 7.10 (td, *J* = 8.2, 3.9 Hz, 1H), 6.76 (d, *J* = 7.7 Hz, 1H), 6.71-6.60 (m, 2H), 5.09 (dd, *J* = 10.1, 6.4 Hz, 1H), 3.68 (s, 3H),

3.53 (dd, *J* = 12.5, 6.6 Hz, 2H), 1.46 (s, 9H). <sup>13</sup>C NMR (125 MHz, CDCl<sub>3</sub>): δ 167.8, 167.7, 159.6, 138.7, 134.0, 131.7, 129.5, 123.4, 121.2, 114.1, 112.6, 82.8, 55.1, 54.1, 34.7, 27.9. HRMS (ESI) for C<sub>22</sub>H<sub>23</sub>NNaO<sub>5</sub> [M+Na]<sup>+</sup>: calcd 404.1474, found 404.1471.

HPLC: Chiralpak AD-3 column (250 mm); detected at 224 nm; *n*-hexane/*i*-propanol = 95/5; flow = 0.7 mL/min; Retention time: 16.4 min (major), 20.2 min.

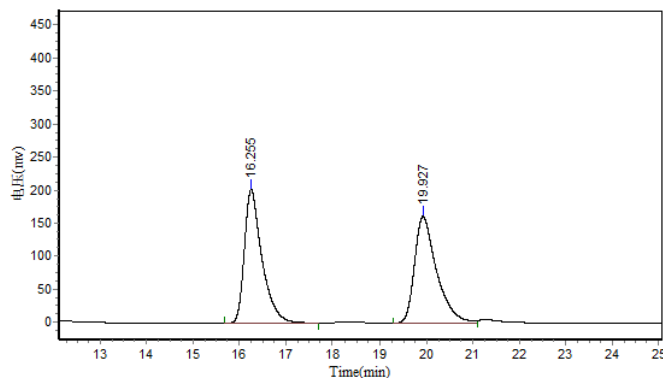

| Results      |         |          |            |              |          |
|--------------|---------|----------|------------|--------------|----------|
| Peak No.     | Peak ID | Ret Time | Height     | Area         | Conc.    |
| 1            |         | 16.255   | 201975.063 | 5270053.500  | 49.7797  |
| 2            |         | 19.927   | 161116.641 | 5316699.500  | 50.2203  |
| <b>Total</b> |         |          | 363091.703 | 10586753.000 | 100.0000 |

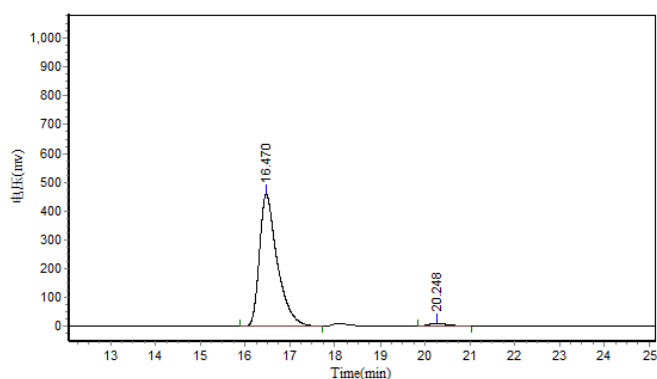

| Results      |         |          |            |              |          |
|--------------|---------|----------|------------|--------------|----------|
| Peak No.     | Peak ID | Ret Time | Height     | Area         | Conc.    |
| 1            |         | 16.470   | 459042.000 | 12752050.000 | 97.5364  |
| 2            |         | 20.248   | 10552.647  | 322097.688   | 2.4636   |
| <b>Total</b> |         |          | 469594.647 | 13074147.688 | 100.0000 |

***tert*-butyl (*S*)-3-(3,4-dimethoxyphenyl)-2-(1,3-dioxisoindolin-2-yl)propanoate (3n)**

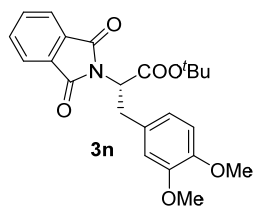

94% yield, colorless oil, 93% ee.

$^1\text{H}$  NMR (300 MHz,  $\text{CDCl}_3$ ):  $\delta$  7.77 (dd,  $J = 5.6, 3.0$  Hz, 2H), 7.69-7.65 (m, 2H), 6.70 (dd,  $J = 6.4, 4.7$  Hz, 2H), 6.64 (t,  $J = 2.1$  Hz, 1H), 5.06 (dd,  $J = 9.7, 7.1$  Hz, 1H), 3.77 (s, 3H),

3.70 (s, 3H), 3.50-3.42 (m, 2H), 1.46 (s, 9H).  $^{13}\text{C}$  NMR (150 MHz,  $\text{CDCl}_3$ ):  $\delta$  167.9, 167.7, 148.7, 147.6, 134.0, 131.7, 129.5, 123.4, 120.9, 111.7, 111.1, 82.8, 55.7, 55.7, 54.1, 34.2, 27.9. HRMS (ESI) for  $\text{C}_{23}\text{H}_{25}\text{NNaO}_6$   $[\text{M}+\text{Na}]^+$ : calcd 434.1580, found 434.1575.

HPLC: Chiralpak AD-H column (250 mm); detected at 224 nm; *n*-hexane/*i*-propanol = 80/20; flow = 0.7 mL/min; Retention time: 10.9 min (major), 12.6 min.

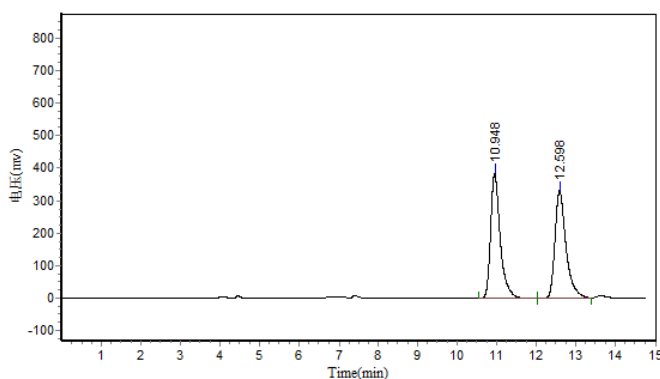

Results

| Peak No.     | Peak ID | Ret Time | Height     | Area         | Conc.    |
|--------------|---------|----------|------------|--------------|----------|
| 1            |         | 10.948   | 382261.438 | 6480073.500  | 50.0868  |
| 2            |         | 12.598   | 329213.688 | 6457619.500  | 49.9132  |
| <b>Total</b> |         |          | 711475.125 | 12937693.000 | 100.0000 |

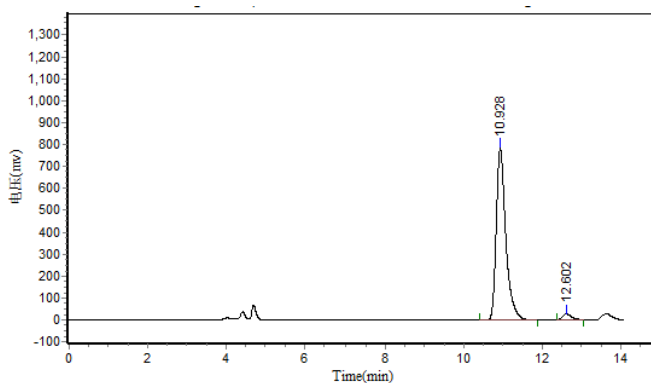

Results

| Peak No.     | Peak ID | Ret Time | Height     | Area         | Conc.    |
|--------------|---------|----------|------------|--------------|----------|
| 1            |         | 10.928   | 782781.250 | 13288629.000 | 96.7633  |
| 2            |         | 12.602   | 26060.676  | 444499.906   | 3.2367   |
| <b>Total</b> |         |          | 808841.926 | 13733128.906 | 100.0000 |

***tert*-butyl (*S*)-2-(1,3-dioxisoindolin-2-yl)-3-(naphthalen-2-yl)propanoate (**3o**)**

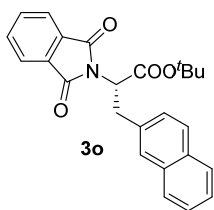

91% yield, colorless oil, 94% ee.

<sup>1</sup>H NMR (300 MHz, CDCl<sub>3</sub>): δ 7.78-7.66 (m, 6H), 7.61 (dt, *J* = 5.2, 3.0 Hz, 2H), 7.43-7.31 (m, 3H), 5.34-5.19 (m, 1H), 3.76 (d, *J* = 8.4 Hz, 2H), 1.49 (s, 9H). <sup>13</sup>C NMR (125 MHz, CDCl<sub>3</sub>): δ

167.9, 167.8, 134.7, 134.0, 133.5, 132.4, 131.7, 128.3, 127.7, 127.6, 127.5, 126.9, 126.0, 125.5, 123.4, 82.9, 54.1, 34.9, 28.0. HRMS (ESI) for C<sub>25</sub>H<sub>23</sub>NNaO<sub>4</sub> [M+Na]<sup>+</sup>: calcd 424.1525, found 424.1517.

HPLC: Chiralpak IC column (250 mm); detected at 224 nm; *n*-hexane/*i*-propanol = 95/5; flow = 0.7 mL/min; Retention time: 13.0 min, 14.4 min (major).

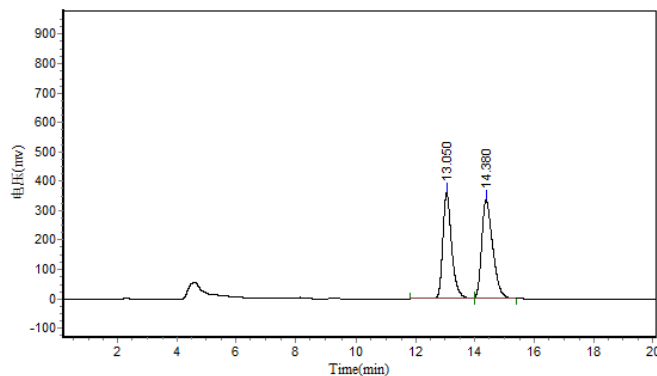

| Results      |         |          |            |              |          |
|--------------|---------|----------|------------|--------------|----------|
| Peak No.     | Peak ID | Ret Time | Height     | Area         | Conc.    |
| 1            |         | 13.050   | 358881.063 | 7499789.000  | 46.4397  |
| 2            |         | 14.380   | 336450.719 | 8649728.000  | 53.5603  |
| <b>Total</b> |         |          | 695331.781 | 16149517.000 | 100.0000 |

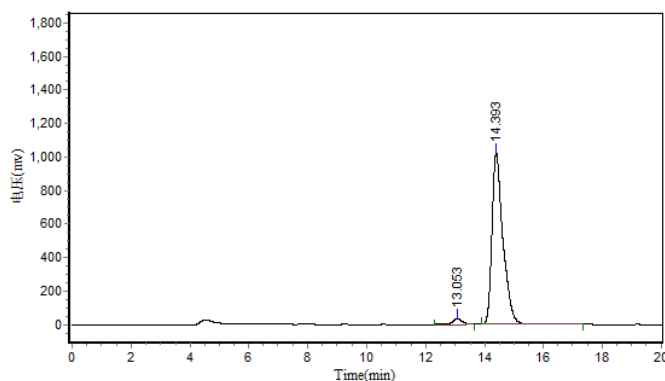

| Results      |         |          |             |              |          |
|--------------|---------|----------|-------------|--------------|----------|
| Peak No.     | Peak ID | Ret Time | Height      | Area         | Conc.    |
| 1            |         | 13.053   | 35270.023   | 786484.250   | 2.8950   |
| 2            |         | 14.393   | 1021479.000 | 26380060.000 | 97.1050  |
| <b>Total</b> |         |          | 1056749.023 | 27166544.250 | 100.0000 |

***tert*-butyl (*S*)-2-(1,3-dioxisoindolin-2-yl)-3-(naphthalen-1-yl)propanoate (**3p**)**

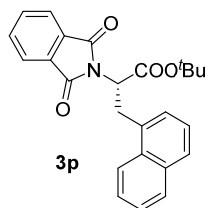

99% yield, colorless oil, 91% ee.

$^1\text{H}$  NMR (300 MHz,  $\text{CDCl}_3$ ):  $\delta$  8.11 (d,  $J = 8.8$  Hz, 1H), 7.81 (d,  $J = 8.4$  Hz, 1H), 7.75 (dd,  $J = 5.3, 3.3$  Hz, 2H), 7.70-7.62 (m, 3H), 7.50 (dt,  $J = 22.7, 7.4$  Hz, 2H), 7.30-7.19 (m, 2H), 5.25 (dd,  $J = 11.2, 4.4$  Hz, 1H), 4.19-4.05 (m, 1H), 3.97-3.80 (m, 1H), 1.49 (s, 9H).  $^{13}\text{C}$  NMR (125 MHz,  $\text{CDCl}_3$ ):  $\delta$  167.9, 167.6, 134.0, 133.8, 133.3, 131.8, 131.7, 128.9, 127.7, 127.1, 126.3, 125.7, 125.2, 123.3, 123.2, 82.9, 53.6, 31.8, 28.0. HRMS (ESI) for  $\text{C}_{25}\text{H}_{23}\text{NNaO}_4$   $[\text{M}+\text{Na}]^+$ : calcd 424.1525, found 424.1517.

HPLC: Chiralpak AD-3 column (250 mm); detected at 224 nm; *n*-hexane/*i*-propanol = 95/5; flow = 0.7 mL/min; Retention time: 13.8 min (major), 15.7 min.

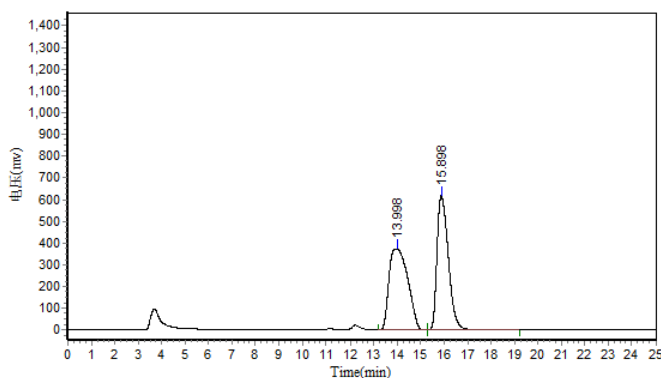

**Results**

| Peak No.     | Peak ID | Ret Time | Height     | Area         | Conc.    |
|--------------|---------|----------|------------|--------------|----------|
| 1            |         | 13.998   | 369473.781 | 20723822.000 | 50.0604  |
| 2            |         | 15.898   | 615535.188 | 20673784.000 | 49.9396  |
| <b>Total</b> |         |          | 985008.969 | 41397606.000 | 100.0000 |

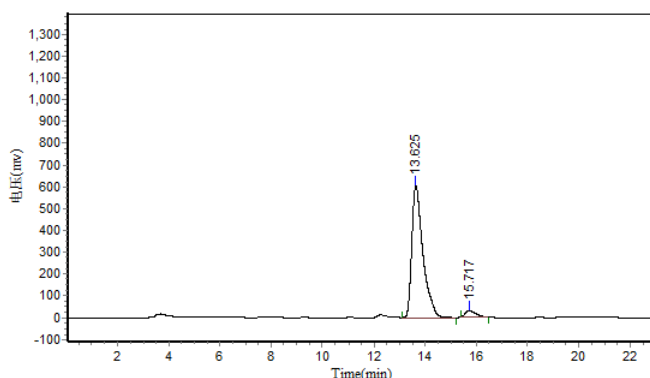

**Results**

| Peak No.     | Peak ID | Ret Time | Height     | Area         | Conc.    |
|--------------|---------|----------|------------|--------------|----------|
| 1            |         | 13.625   | 605989.250 | 18266516.000 | 95.5858  |
| 2            |         | 15.717   | 30078.732  | 843564.313   | 4.4142   |
| <b>Total</b> |         |          | 636067.982 | 19110080.313 | 100.0000 |



***tert*-butyl (*S*)-2-(1,3-dioxisoindolin-2-yl)-3-(*o*-tolyl)propanoate (3q)**

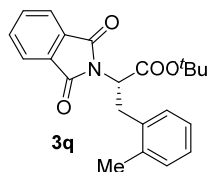

99% yield, colorless oil, 94% ee.

$^1\text{H NMR}$  (300 MHz,  $\text{CDCl}_3$ ):  $\delta$  7.88-7.75 (m, 2H), 7.69 (m, 2H),

7.19-6.84 (m, 4H), 5.09 (dd,  $J = 11.0, 5.1$  Hz, 1H), 3.68-3.34 (m,

2H), 2.39 (s, 3H), 1.47 (s, 9H).  $^{13}\text{C NMR}$  (150 MHz,  $\text{CDCl}_3$ ):  $\delta$  168.0, 167.7, 136.6,

135.2, 134.0, 131.7, 130.5, 129.6, 126.9, 125.9, 123.4, 82.8, 52.5, 32.3, 27.9, 19.3.

HRMS (ESI) for  $\text{C}_{22}\text{H}_{23}\text{NNaO}_4$   $[\text{M}+\text{Na}]^+$ : calcd 388.1525, found 388.1520.

HPLC: Chiralpak AD-H column (250 mm); detected at 224 nm; *n*-hexane/*i*-propanol = 95/5; flow = 0.7 mL/min; Retention time: 10.3 min (major), 11.9 min.

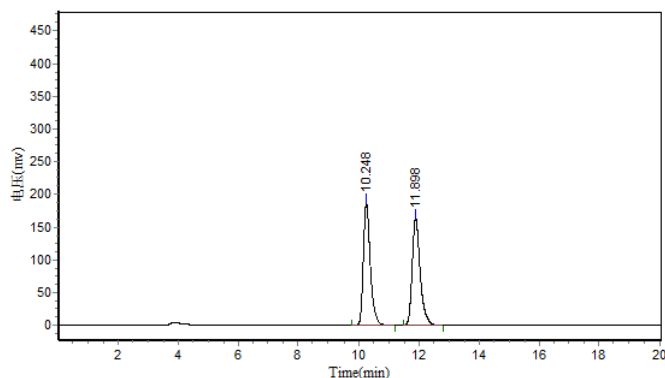

**Results**

| Peak No.     | Peak ID | Ret Time | Height     | Area        | Conc.    |
|--------------|---------|----------|------------|-------------|----------|
| 1            |         | 10.248   | 187121.766 | 3075198.750 | 50.1664  |
| 2            |         | 11.898   | 163839.594 | 3054798.500 | 49.8336  |
| <b>Total</b> |         |          | 350961.359 | 6129997.250 | 100.0000 |

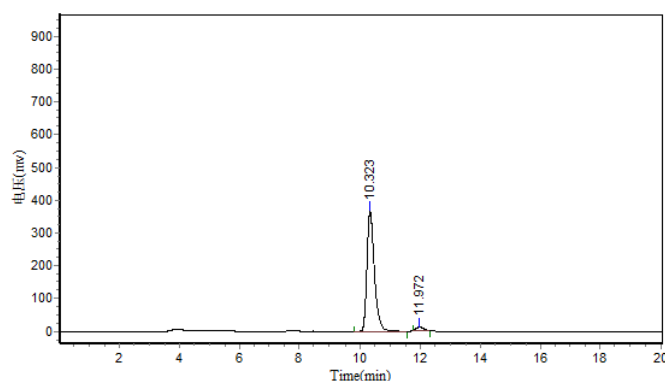

**Results**

| Peak No.     | Peak ID | Ret Time | Height     | Area        | Conc.    |
|--------------|---------|----------|------------|-------------|----------|
| 1            |         | 10.323   | 366041.750 | 6380191.500 | 96.9115  |
| 2            |         | 11.972   | 12642.690  | 203330.703  | 3.0885   |
| <b>Total</b> |         |          | 378684.440 | 6583522.203 | 100.0000 |

***tert*-butyl (*S*)-3-(2-chlorophenyl)-2-(1,3-dioxisoindolin-2-yl)propanoate (**3r**)**

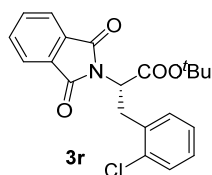

63% yield, colorless oil, 79% ee.

$^1\text{H}$  NMR (300 MHz,  $\text{CDCl}_3$ ):  $\delta$  7.78 (dt,  $J = 6.9, 3.5$  Hz, 2H), 7.73-7.55 (m, 2H), 7.29 (dd,  $J = 7.6, 6.2$  Hz, 1H), 7.05 (dt,  $J = 14.6, 7.6$  Hz, 3H), 5.23 (dd,  $J = 11.3, 4.7$  Hz, 1H), 3.75 (dd,  $J = 14.2, 4.7$  Hz, 1H), 3.55 (dd,  $J = 14.1, 11.4$  Hz, 1H), 1.46 (s, 9H).  $^{13}\text{C}$  NMR (125 MHz,  $\text{CDCl}_3$ ):  $\delta$  167.6, 167.5, 135.0, 134.4, 134.0, 131.7, 131.3, 129.6, 128.4, 126.8, 123.4, 82.9, 52.2, 33.0, 27.9. HRMS (ESI) for  $\text{C}_{21}\text{H}_{20}\text{ClNNaO}_4$   $[\text{M}+\text{Na}]^+$ : calcd 408.0979, found 408.0974.

HPLC: Chiralcel OD-3 column (250 mm); detected at 224 nm; *n*-hexane/*i*-propanol = 90/10; flow = 0.7 mL/min; Retention time: 7.8 min, 11.5 min (major).

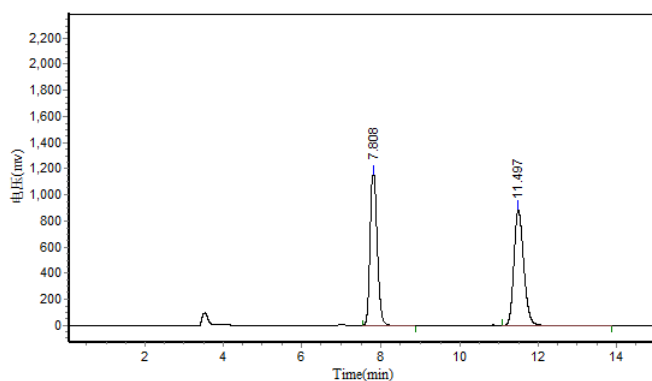

**Results**

| Peak No.     | Peak ID | Ret Time | Height      | Area         | Conc.    |
|--------------|---------|----------|-------------|--------------|----------|
| 1            |         | 7.808    | 1153082.875 | 14955612.000 | 49.1913  |
| 2            |         | 11.497   | 885966.125  | 15447328.000 | 50.8087  |
| <b>Total</b> |         |          | 2039049.000 | 30402940.000 | 100.0000 |

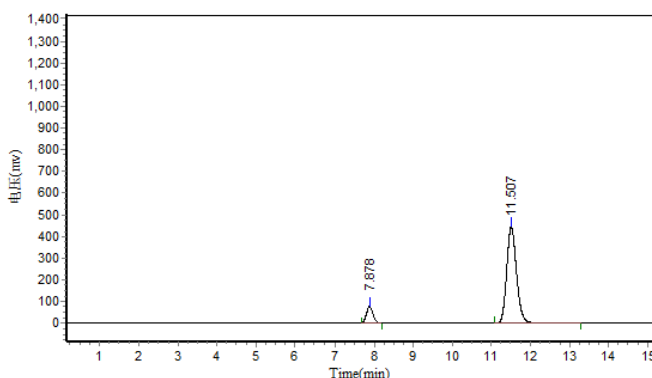

**Results**

| Peak No.     | Peak ID | Ret Time | Height     | Area        | Conc.    |
|--------------|---------|----------|------------|-------------|----------|
| 1            |         | 7.878    | 76719.398  | 910756.313  | 10.5258  |
| 2            |         | 11.507   | 443128.281 | 7741860.000 | 89.4742  |
| <b>Total</b> |         |          | 519847.680 | 8652616.313 | 100.0000 |

#### 4. Deuterium labeling experiment of phenylalanine product 3

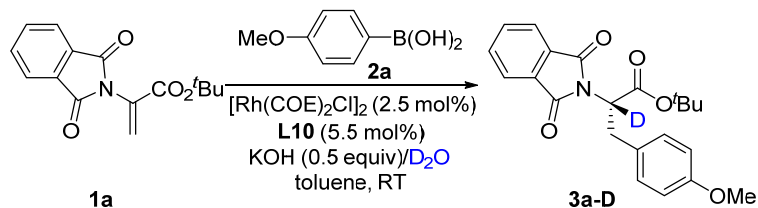

Under Ar atmosphere, a solution of  $\alpha$ -phthalylimide *tert*-butyl acrylate **1a** (0.1 mmol), 4-methoxy arylboronic acid **2a** (0.3 mmol),  $[\text{Rh}(\text{COE})_2\text{Cl}]_2$  (1.8 mg, 0.005 mmol of Rh), **L10** (2.2 mg, 0.0055 mmol) in 1.0 mL of anhydrous toluene was stirred at room temperature for 30 min. To this mixture was added aqueous KOH in  $\text{D}_2\text{O}$  (0.05 mL, 1.0 M, 0.05 mmol). After reaction for another 12 hours, a saturated aq.  $\text{NH}_4\text{Cl}$  was added and the mixture was extracted with EtOAc (10 mL $\times$ 3). The combined organic phase was dried over  $\text{Na}_2\text{SO}_4$ , filtered, and concentrated. The residue was purified by silica gel flash chromatography, eluting with petroleum ether/EtOAc (20%-30% EtOAc), to afford the corresponding products **3a-D**.

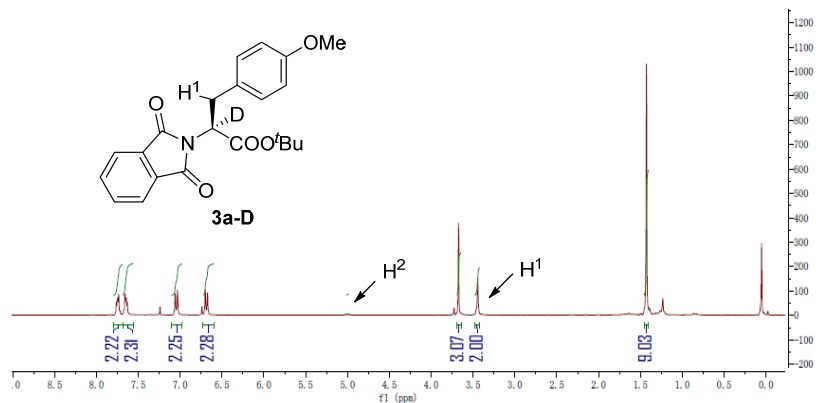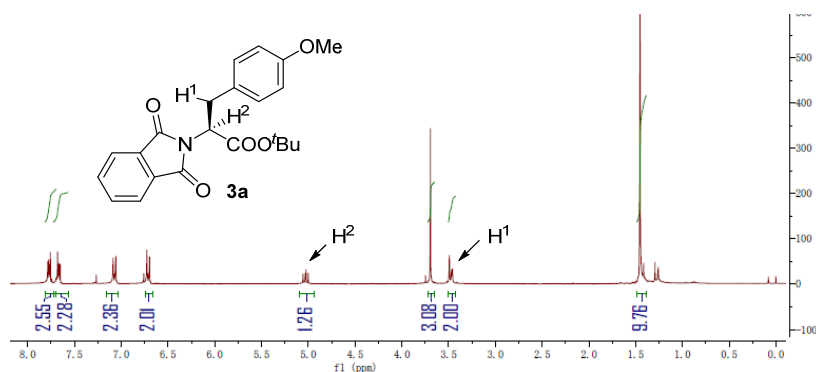

## 5. General procedure for Rh-catalyzed asymmetric 1,4-addition/asymmetric protonation of acrylate substrates **4**

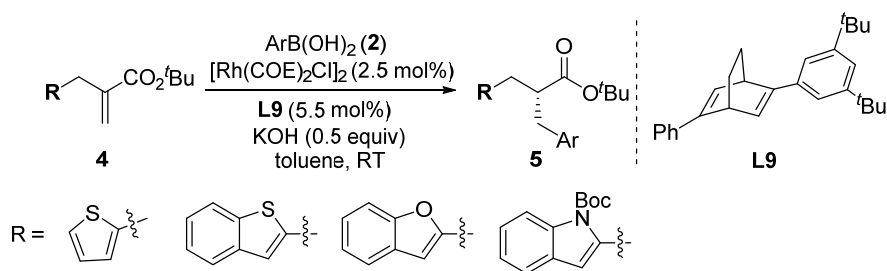

Under Ar atmosphere, a solution of acrylate **4** (0.1 mmol), arylboronic acid **2** (0.3 mmol),  $[\text{Rh}(\text{COE})_2\text{Cl}]_2$  (1.8 mg, 0.005 mmol of Rh), **L9** (2.2 mg, 0.0055 mmol) in 1.0 mL of anhydrous toluene was stirred at room temperature for 30 min. To this mixture was added KOH (0.05 mL, 1.0 M, 0.05 mmol). After reaction for another 12 hours, a saturated aq.  $\text{NH}_4\text{Cl}$  was added and the mixture was extracted with EtOAc (10 mL $\times$ 3). The combined organic phase was dried over  $\text{Na}_2\text{SO}_4$ , filtered, and concentrated. The residue was purified by silica gel flash chromatography, eluting with petroleum ether/EtOAc (1%-5% EtOAc), to afford the corresponding products **5**.

## 6. Characterization data and HPLC of products 5

### *tert*-butyl (*R*)-2-(4-methoxybenzyl)-3-(thiophen-2-yl)propanoate (**5a**)

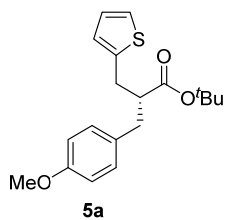

98% yield, light yellow oil, 98% ee.

$^1\text{H NMR}$  (300 MHz,  $\text{CDCl}_3$ ):  $\delta$  7.09 (t,  $J = 6.5$  Hz, 3H), 6.95-6.84 (m, 1H), 6.80 (d,  $J = 8.5$  Hz, 3H), 3.77 (s, 3H), 3.11 (dd,  $J = 14.7, 8.0$  Hz, 1H), 2.92 (dd,  $J = 20.1, 5.2$  Hz, 1H), 2.83 (t,  $J = 12.5$  Hz, 2H), 2.79-2.64 (m, 1H), 1.26 (s, 9H).  $^{13}\text{C NMR}$  (125 MHz,  $\text{CDCl}_3$ ):  $\delta$  173.4, 157.7, 141.3, 130.6, 129.6, 126.1, 125.1, 123.2, 113.3, 80.1, 54.8, 50.1, 37.0, 31.7, 27.5. HRMS (ESI) for  $\text{C}_{19}\text{H}_{24}\text{NaO}_3\text{S}$   $[\text{M}+\text{Na}]^+$ : calcd 355.1344, found 355.1337.

HPLC: Chiralcel OD-3 column (250 mm); detected at 224 nm; *n*-hexane/*i*-propanol = 99/1; flow = 1.0 mL/min; Retention time: 11.5 min (major), 12.7 min.

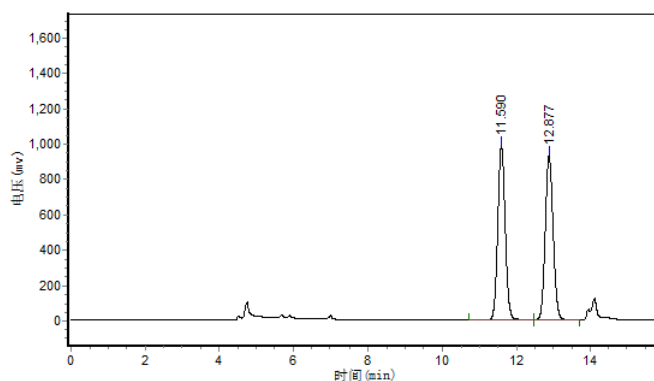

分析结果表

| 峰号 | 峰名 | 保留时间   | 峰高          | 峰面积          | 含量       |
|----|----|--------|-------------|--------------|----------|
| 1  |    | 11.590 | 982080.438  | 13716245.000 | 50.0199  |
| 2  |    | 12.877 | 924450.875  | 13705355.000 | 49.9801  |
| 总计 |    |        | 1906531.313 | 27421600.000 | 100.0000 |

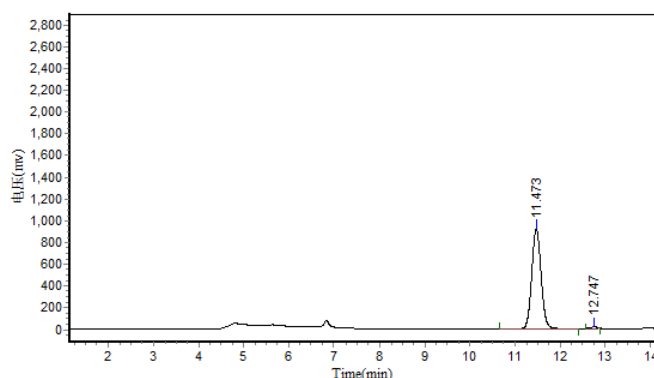

Results

| Peak No. | Peak ID | Ret Time | Height     | Area         | Conc.    |
|----------|---------|----------|------------|--------------|----------|
| 1        |         | 11.473   | 918679.250 | 13294426.000 | 99.0423  |
| 2        |         | 12.747   | 12062.463  | 128549.570   | 0.9577   |
| Total    |         |          | 930741.713 | 13422975.570 | 100.0000 |

***tert*-butyl (*R*)-3-([1,1'-biphenyl]-4-yl)-2-(thiophen-2-ylmethyl)propanoate (**5b**)**

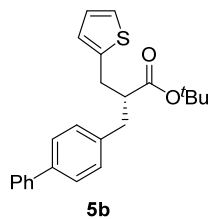

95% yield, light yellow oil, 97% ee.

$^1\text{H NMR}$  (300 MHz,  $\text{CDCl}_3$ ):  $\delta$  7.59 (d,  $J = 8.3$  Hz, 2H), 7.52 (d,  $J = 8.2$  Hz, 2H), 7.44 (t,  $J = 7.1$  Hz, 2H), 7.35 (d,  $J = 7.3$  Hz, 1H), 7.27 (d,  $J = 5.6$  Hz, 2H), 7.15 (d,  $J = 5.0$  Hz, 1H), 6.92 (m, 1H), 6.84 (m, 1H), 3.28-3.11 (m, 1H), 2.96 (m, 4H), 1.28 (s, 9H).  $^{13}\text{C NMR}$  (125 MHz,  $\text{CDCl}_3$ ):  $\delta$  173.3, 141.2, 140.5, 138.8, 137.6, 129.0, 128.3, 126.7, 126.6, 126.5, 126.2, 125.2, 123.3, 80.2, 49.8, 37.4, 31.8, 27.4. HRMS (ESI) for  $\text{C}_{24}\text{H}_{26}\text{NaO}_2\text{S}$   $[\text{M}+\text{Na}]^+$ : calcd 401.1551, found 401.1547.

HPLC: Chiralcel OD-3 column (250 mm); detected at 224 nm; *n*-hexane/*i*-propanol = 99/1; flow = 0.7 mL/min; Retention time: 13.1 min (major), 20.4 min.

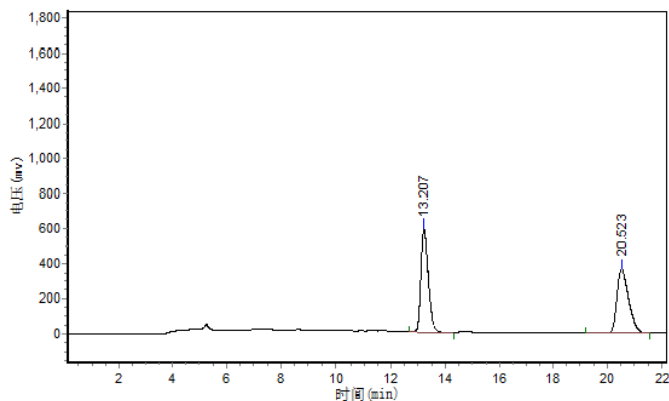

分析结果表

| 峰号 | 峰名 | 保留时间   | 峰高         | 峰面积          | 含量       |
|----|----|--------|------------|--------------|----------|
| 1  |    | 13.207 | 584342.875 | 11334915.000 | 60.0465  |
| 2  |    | 20.523 | 370854.719 | 11313871.000 | 49.9535  |
| 总计 |    |        | 955197.594 | 22848786.000 | 100.0000 |

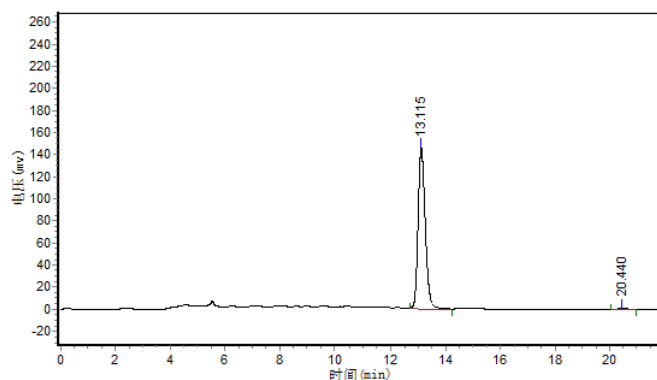

分析结果表

| 峰号 | 峰名 | 保留时间   | 峰高         | 峰面积         | 含量       |
|----|----|--------|------------|-------------|----------|
| 1  |    | 13.115 | 144669.875 | 2628346.750 | 98.4602  |
| 2  |    | 20.440 | 1585.299   | 41104.602   | 1.5398   |
| 总计 |    |        | 146255.174 | 2669451.352 | 100.0000 |

***tert*-butyl (*R*)-3-(naphthalen-2-yl)-2-(thiophen-2-ylmethyl)propanoate (**5c**)**

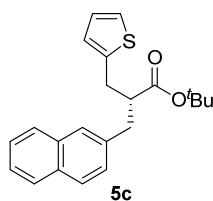

98% yield, light yellow oil, 98% ee.

$^1\text{H NMR}$  (300 MHz,  $\text{CDCl}_3$ ):  $\delta$  7.77 (t,  $J = 9.4$  Hz, 3H), 7.62 (s, 1H), 7.46-7.37 (m, 2H), 7.32 (d,  $J = 8.4$  Hz, 1H), 7.13 (d,  $J = 5.1$  Hz, 1H), 6.93-6.86 (m, 1H), 6.82 (s, 1H), 3.25-3.08 (m, 2H), 3.07-2.90 (m, 3H), 1.23 (s, 9H).  $^{13}\text{C NMR}$  (125 MHz,  $\text{CDCl}_3$ ):  $\delta$  173.3, 141.2, 136.1, 133.0, 131.8, 127.5, 127.2, 127.0, 126.2, 125.5, 125.2, 124.9, 123.3, 80.2, 49.8, 37.9, 31.8, 27.4. HRMS (ESI) for  $\text{C}_{22}\text{H}_{24}\text{NaO}_2\text{S}$   $[\text{M}+\text{Na}]^+$ : calcd 375.1395, found 375.1392.

HPLC: Chiralcel OD-3 column (250 mm); detected at 254 nm; *n*-hexane/*i*-propanol = 99/1; flow = 0.7 mL/min; Retention time: 11.2 min (major), 12.3 min.

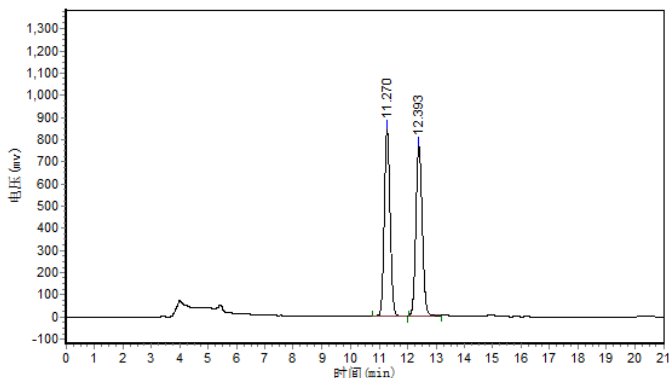

分析结果表

| 峰号 | 峰名 | 保留时间   | 峰高          | 峰面积          | 含量       |
|----|----|--------|-------------|--------------|----------|
| 1  |    | 11.270 | 840562.000  | 12010578.000 | 50.2155  |
| 2  |    | 12.393 | 763877.625  | 11907513.000 | 49.7845  |
| 总计 |    |        | 1604439.625 | 23918091.000 | 100.0000 |

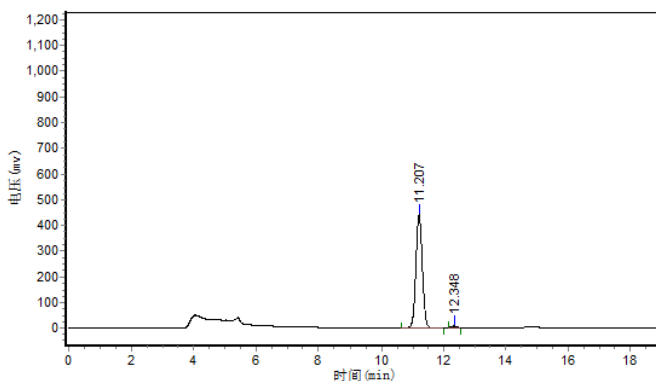

分析结果表

| 峰号 | 峰名 | 保留时间   | 峰高         | 峰面积         | 含量       |
|----|----|--------|------------|-------------|----------|
| 1  |    | 11.207 | 439217.188 | 6348518.500 | 98.8011  |
| 2  |    | 12.348 | 5977.667   | 77035.203   | 1.1989   |
| 总计 |    |        | 445194.854 | 6425553.703 | 100.0000 |

***tert*-butyl (*R*)-3-(naphthalen-1-yl)-2-(thiophen-2-ylmethyl)propanoate (5d)**

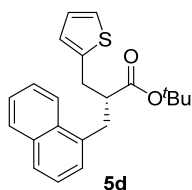

98% yield, light yellow oil, 97% ee.

$^1\text{H}$  NMR (300 MHz,  $\text{CDCl}_3$ ):  $\delta$  7.95 (d,  $J = 7.4$  Hz, 1H), 7.86 (d,  $J = 8.6$  Hz, 1H), 7.74 (d,  $J = 7.5$  Hz, 1H), 7.51 (dd,  $J = 9.1, 6.1$  Hz, 2H), 7.44-7.32 (m, 2H), 7.15 (d,  $J = 4.0$  Hz, 1H), 6.97-6.89 (m, 1H), 6.85 (s, 1H), 3.41 (dd,  $J = 13.9, 8.3$  Hz, 1H), 3.29 (dd,  $J = 14.1, 5.4$  Hz, 2H), 3.18-3.00 (m, 2H), 1.23 (s, 9H).  $^{13}\text{C}$  NMR (125 MHz,  $\text{CDCl}_3$ ):  $\delta$  173.4, 141.2, 134.6, 133.4, 131.4, 128.3, 126.8, 126.7, 126.2, 125.5, 125.3, 125.0, 124.8, 123.3, 123.2, 80.1, 49.0, 34.9, 32.1, 27.4. HRMS (ESI) for  $\text{C}_{22}\text{H}_{24}\text{NaO}_2\text{S}$   $[\text{M}+\text{Na}]^+$ : calcd 375.1395, found 375.1392.

HPLC: Chiralcel OD-3 column (250 mm); detected at 224 nm; *n*-hexane/*i*-propanol = 99/1; flow = 0.7 mL/min; Retention time: 13.1 min (major), 20.4 min.

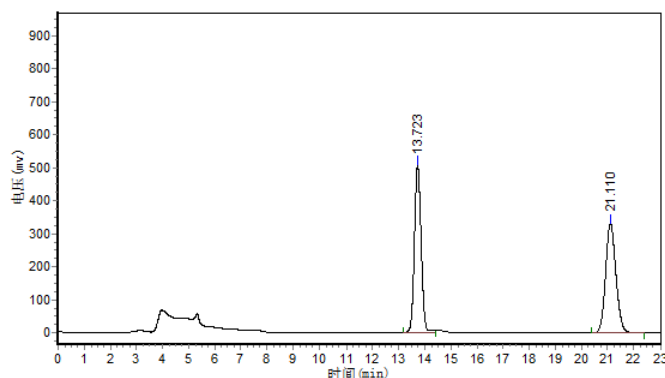

分析结果表

| 峰号 | 峰名 | 保留时间   | 峰高         | 峰面积          | 含量       |
|----|----|--------|------------|--------------|----------|
| 1  |    | 13.723 | 506419.750 | 9074102.000  | 49.7063  |
| 2  |    | 21.110 | 332515.563 | 9181336.000  | 50.2937  |
| 总计 |    |        | 838935.313 | 18255438.000 | 100.0000 |

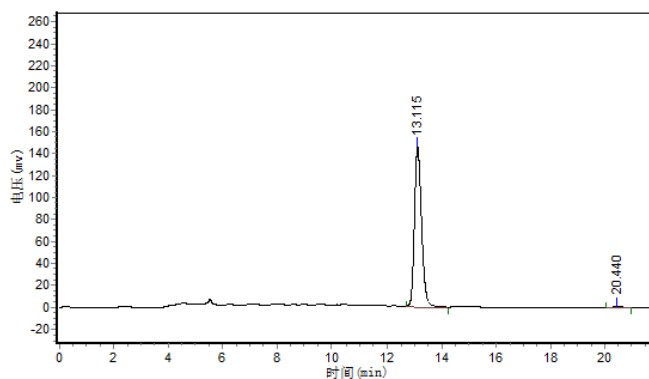

分析结果表

| 峰号 | 峰名 | 保留时间   | 峰高         | 峰面积         | 含量       |
|----|----|--------|------------|-------------|----------|
| 1  |    | 13.115 | 144669.875 | 2628346.750 | 98.4602  |
| 2  |    | 20.440 | 1585.299   | 41104.602   | 1.5398   |
| 总计 |    |        | 146255.174 | 2669451.352 | 100.0000 |



***tert*-butyl (*R*)-2-(4-(*tert*-butyl)benzyl)-3-(thiophen-2-yl)propanoate (**5e**)**

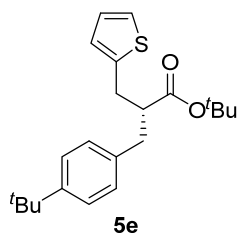

95% yield, light yellow oil, 96% ee.

$^1\text{H}$  NMR (300 MHz,  $\text{CDCl}_3$ ):  $\delta$  7.27 (t,  $J = 8.5$  Hz, 2H), 7.16-7.06 (m, 3H), 6.91-6.84 (m, 1H), 6.80 (d,  $J = 2.3$  Hz, 1H), 3.21-3.05 (m, 1H), 3.00-2.83 (m, 3H), 2.83-2.69 (m, 1H), 1.29 (s, 9H), 1.24 (s, 9H).  $^{13}\text{C}$  NMR (125 MHz,  $\text{CDCl}_3$ ):  $\delta$  173.4, 148.7,

141.4, 135.4, 128.3, 126.1, 125.1, 124.7, 123.1, 80.0, 49.8, 37.4, 33.9, 31.7, 30.9, 27.4.

HRMS (ESI) for  $\text{C}_{22}\text{H}_{30}\text{NaO}_2\text{S}$   $[\text{M}+\text{Na}]^+$ : calcd 381.1864, found 381.1857.

HPLC: Chiralcel OD-3 column (250 mm); detected at 224 nm; *n*-hexane/*i*-propanol = 99.5/0.5; flow = 0.5 mL/min; Retention time: 30.85 min (major), 35.24 min.

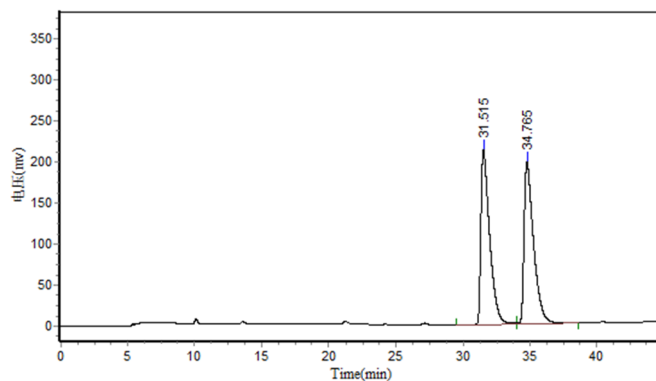

**Results**

| Peak No.     | Peak ID | Ret Time | Height     | Area         | Conc.    |
|--------------|---------|----------|------------|--------------|----------|
| 1            |         | 31.515   | 212916.344 | 9800965.000  | 49.7370  |
| 2            |         | 34.765   | 197463.734 | 9904624.000  | 50.2630  |
| <b>Total</b> |         |          | 410380.078 | 19705589.000 | 100.0000 |

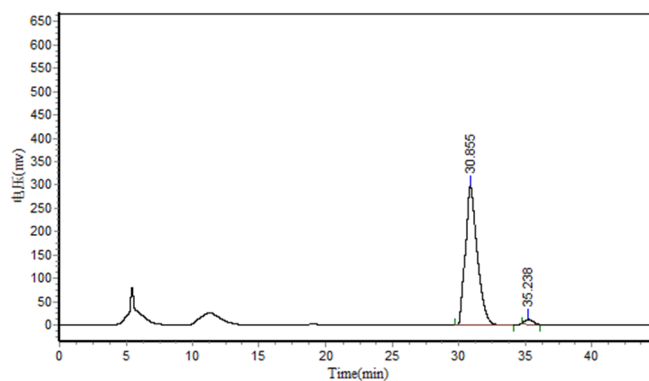

**Results**

| Peak No.     | Peak ID | Ret Time | Height     | Area         | Conc.    |
|--------------|---------|----------|------------|--------------|----------|
| 1            |         | 30.855   | 299362.094 | 18664564.000 | 97.7667  |
| 2            |         | 35.238   | 9566.298   | 426365.875   | 2.2333   |
| <b>Total</b> |         |          | 308928.392 | 19090929.875 | 100.0000 |

**tert-butyl (R)-2-(4-bromobenzyl)-3-(thiophen-2-yl)propanoate (5f)**

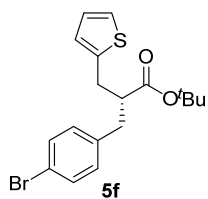

95% yield, light yellow oil, 96% ee.

$^1\text{H}$  NMR (300 MHz,  $\text{CDCl}_3$ ):  $\delta$  7.39 (t,  $J = 8.3$  Hz, 2H), 7.15 (d,  $J = 4.6$  Hz, 1H), 7.06 (d,  $J = 8.2$  Hz, 2H), 6.98-6.86 (m, 1H), 6.82 (s, 1H), 3.16 (dd,  $J = 14.5, 7.3$  Hz, 1H), 3.04-2.91 (m, 1H),

2.85 (dd,  $J = 15.6, 8.1$  Hz, 2H), 2.80-2.70 (m, 1H), 1.28 (s, 9H).  $^{13}\text{C}$  NMR (125 MHz,  $\text{CDCl}_3$ ):  $\delta$  173.0, 140.9, 137.6, 130.9, 130.3, 126.2, 125.3, 123.4, 119.7, 80.3, 49.7, 37.0, 31.9, 27.5. HRMS (ESI) for  $\text{C}_{18}\text{H}_{21}\text{BrNaO}_2\text{S}$   $[\text{M}+\text{Na}]^+$ : calcd 403.0343, found 403.0334.

HPLC: Chiralcel OD-3 column (250 mm); detected at 224 nm; *n*-hexane/*i*-propanol = 99.5/0.5; flow = 0.5 mL/min; Retention time: 14.49 min (major), 15.69 min.

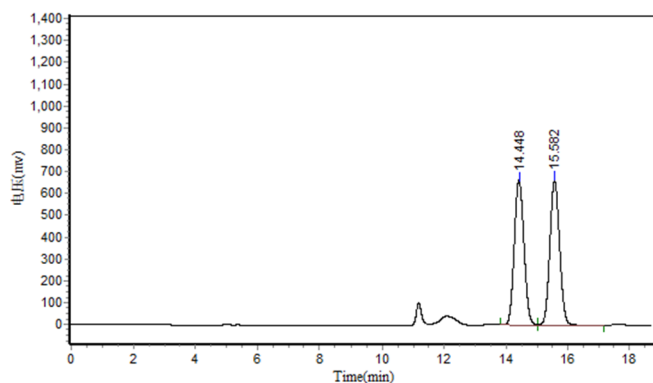

Results

| Peak No.     | Peak ID | Ret Time | Height      | Area         | Conc.    |
|--------------|---------|----------|-------------|--------------|----------|
| 1            |         | 14.448   | 662783.000  | 14553785.000 | 49.9536  |
| 2            |         | 15.582   | 661657.875  | 14580839.000 | 50.0464  |
| <b>Total</b> |         |          | 1324440.875 | 29134624.000 | 100.0000 |

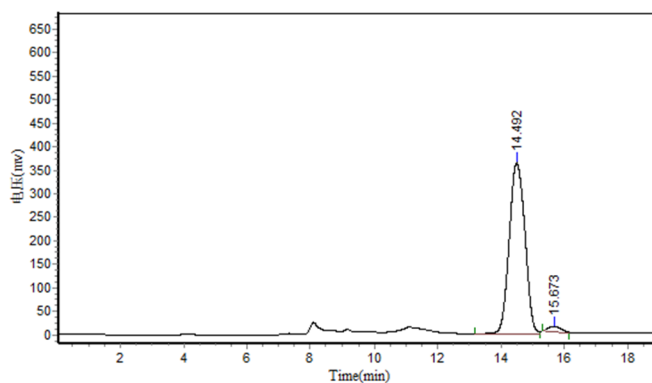

Results

| Peak No.     | Peak ID | Ret Time | Height     | Area         | Conc.    |
|--------------|---------|----------|------------|--------------|----------|
| 1            |         | 14.492   | 364179.188 | 12592760.000 | 97.8505  |
| 2            |         | 15.673   | 10377.890  | 276626.188   | 2.1495   |
| <b>Total</b> |         |          | 374557.077 | 12869386.188 | 100.0000 |

***tert*-butyl (*R*)-2-(2-methoxybenzyl)-3-(thiophen-2-yl)propanoate (**5g**)**

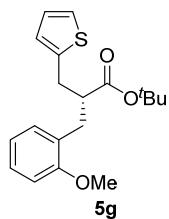

98% yield, light yellow oil, 96% ee.

<sup>1</sup>H NMR (300 MHz, CDCl<sub>3</sub>): δ 7.19 (t, *J* = 7.0 Hz, 1H), 7.15-7.09 (m, 2H), 6.94-6.76 (m, 4H), 3.82 (s, 3H), 3.17 (dd, *J* = 13.2, 8.1 Hz, 1H), 3.09-2.95 (m, 2H), 2.94-2.78 (m, 2H), 1.24 (s, 9H). <sup>13</sup>C NMR (125 MHz, CDCl<sub>3</sub>): δ 173.7, 157.2, 141.7, 130.4, 127.2, 126.9, 126.0, 124.9, 123.0, 119.6, 109.7, 79.7, 54.7, 47.7, 33.0, 32.0, 27.4. HRMS (ESI) for C<sub>19</sub>H<sub>24</sub>NaO<sub>3</sub>S [M+Na]<sup>+</sup>: calcd 355.1344, found 355.1337.

HPLC: Chiralcel OD-3 column (250 mm); detected at 224 nm; *n*-hexane/*i*-propanol = 93/7; flow = 0.6 mL/min; Retention time: 11.2 min (major), 14.8 min.

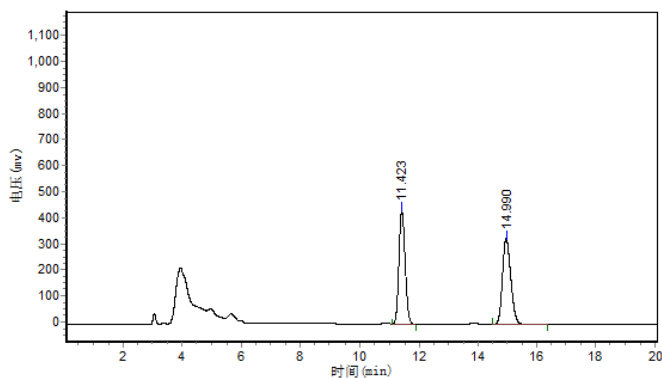

分析结果表

| 峰号 | 峰名 | 保留时间   | 峰高         | 峰面积          | 含量       |
|----|----|--------|------------|--------------|----------|
| 1  |    | 11.423 | 433707.813 | 6433252.500  | 49.5985  |
| 2  |    | 14.990 | 327818.969 | 6537402.500  | 50.4015  |
| 总计 |    |        | 761526.781 | 12970655.000 | 100.0000 |

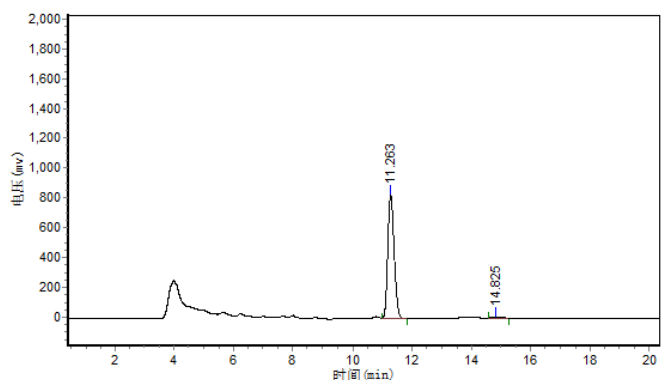

分析结果表

| 峰号 | 峰名 | 保留时间   | 峰高         | 峰面积          | 含量       |
|----|----|--------|------------|--------------|----------|
| 1  |    | 11.263 | 822617.500 | 12328463.000 | 98.3760  |
| 2  |    | 14.825 | 8711.854   | 203518.188   | 1.6240   |
| 总计 |    |        | 831329.354 | 12531981.188 | 100.0000 |

**tert-butyl (R)-3-(benzo[b]thiophen-2-yl)-2-(4-methoxybenzyl)propanoate (5h)**

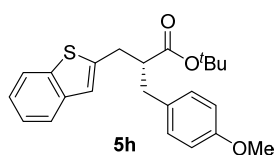

99% yield, light yellow oil, 98% ee.

<sup>1</sup>H NMR (300 MHz, CDCl<sub>3</sub>): δ 7.77 (d, *J* = 7.6 Hz, 1H), 7.67 (d, *J* = 7.6 Hz, 1H), 7.39-7.21 (m, 2H), 7.13 (d, *J* = 8.3 Hz, 2H), 7.04 (s, 1H), 6.84 (d, *J* = 8.4 Hz, 2H), 3.80 (s, 3H), 3.23 (dd, *J* = 14.4, 7.3 Hz, 1H), 3.10-2.87 (m, 3H), 2.82 (t, *J* = 8.7 Hz, 1H), 1.29 (s, 9H). <sup>13</sup>C NMR (125 MHz, CDCl<sub>3</sub>): δ 173.3, 157.8, 142.6, 139.6, 139.2, 130.5, 129.7, 123.7, 123.2, 122.4, 121.8, 121.7, 113.3, 80.3, 54.8, 49.5, 37.0, 32.5, 27.5. HRMS (ESI) for C<sub>23</sub>H<sub>26</sub>NaO<sub>3</sub>S [M+Na]<sup>+</sup>: calcd 405.1500, found 405.1506.

HPLC: Chiralcel OD-3 column (250 mm); detected at 254 nm; *n*-hexane/*i*-propanol = 99/1; flow = 0.7 mL/min; Retention time: 11.9 min (major), 13.0 min.

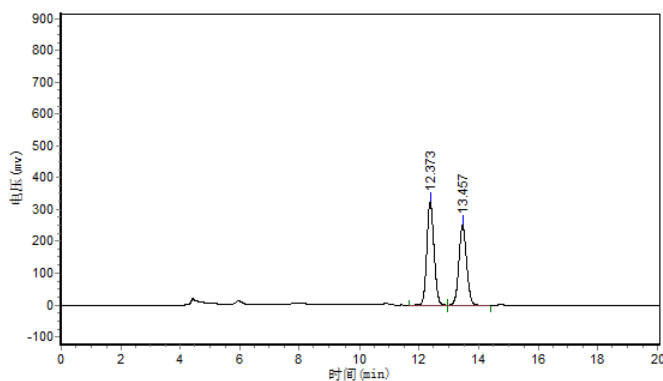

分析结果表

| 峰号 | 峰名 | 保留时间   | 峰高         | 峰面积          | 含量       |
|----|----|--------|------------|--------------|----------|
| 1  |    | 12.373 | 324833.250 | 5475811.500  | 54.4085  |
| 2  |    | 13.457 | 250194.719 | 4588441.500  | 45.5915  |
| 总计 |    |        | 575027.969 | 10064253.000 | 100.0000 |

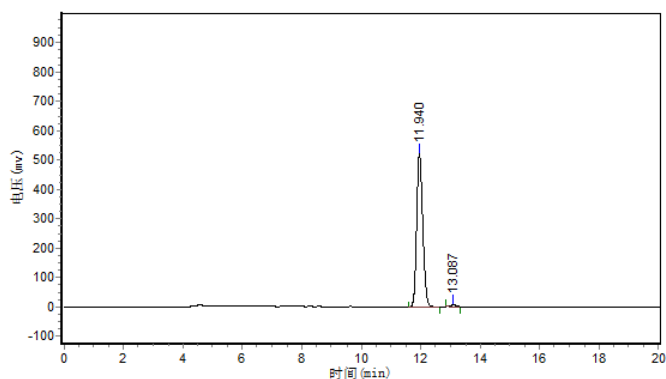

分析结果表

| 峰号 | 峰名 | 保留时间   | 峰高         | 峰面积         | 含量       |
|----|----|--------|------------|-------------|----------|
| 1  |    | 11.940 | 520447.563 | 7442627.000 | 99.0260  |
| 2  |    | 13.087 | 5289.159   | 73201.000   | 0.9740   |
| 总计 |    |        | 525736.721 | 7515828.000 | 100.0000 |

***tert*-butyl (*R*)-3-(benzo[*b*]thiophen-2-yl)-2-(4-methylbenzyl)propanoate (**5i**)**

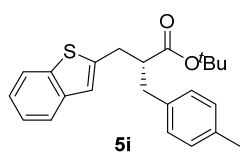

98% yield, light yellow oil, 97% ee.

$^1\text{H}$  NMR (300 MHz,  $\text{CDCl}_3$ ):  $\delta$  7.77 (d,  $J = 7.9$  Hz, 1H), 7.71-7.60 (m, 1H), 7.37-7.27 (m, 2H), 7.10 (m, 4H), 7.04 (s, 1H), 3.22 (dd,  $J = 14.2, 6.9$  Hz, 1H), 3.07-2.87 (m, 3H), 2.83 (t,  $J = 8.2$  Hz, 1H), 2.33 (s, 3H), 1.29 (s, 9H).  $^{13}\text{C}$  NMR (125 MHz,  $\text{CDCl}_3$ ):  $\delta$  173.7, 143.0, 139.9, 139.5, 135.9, 135.6, 129.0, 128.9, 124.0, 123.6, 122.8, 122.1, 122.0, 80.7, 49.7, 37.8, 32.8, 27.9, 21.0. HRMS (ESI) for  $\text{C}_{23}\text{H}_{26}\text{NaO}_2\text{S}$   $[\text{M}+\text{Na}]^+$ : calcd 389.1551, found 389.1549.

HPLC: Chiralcel OJ-H column (250 mm); detected at 224 nm; *n*-hexane/*i*-propanol = 99/1; flow = 0.7 mL/min; Retention time: 13.8 min (major), 17.7 min.

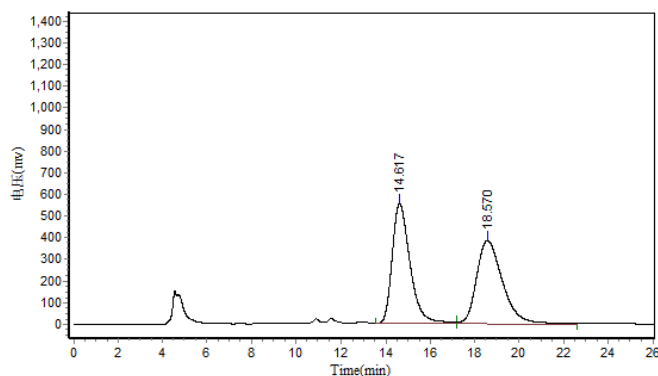

Results

| Peak No.     | Peak ID | Ret Time | Height     | Area         | Conc.    |
|--------------|---------|----------|------------|--------------|----------|
| 1            |         | 14.617   | 555852.313 | 31276084.000 | 50.0357  |
| 2            |         | 18.570   | 385747.781 | 31231466.000 | 49.9643  |
| <b>Total</b> |         |          | 941600.094 | 62507550.000 | 100.0000 |

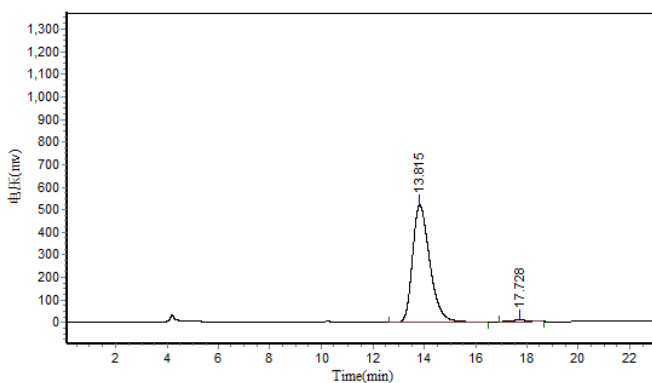

Results

| Peak No.     | Peak ID | Ret Time | Height     | Area         | Conc.    |
|--------------|---------|----------|------------|--------------|----------|
| 1            |         | 13.815   | 520208.563 | 24421908.000 | 98.5015  |
| 2            |         | 17.728   | 6697.141   | 371524.000   | 1.4985   |
| <b>Total</b> |         |          | 526905.704 | 24793432.000 | 100.0000 |

***tert*-butyl (*R*)-3-(benzo[*b*]thiophen-2-yl)-2-(4-(trifluoromethyl)benzyl)propanoate (5j)**

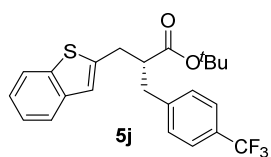

96% yield, light yellow oil, 90% ee.

<sup>1</sup>H NMR (300 MHz, CDCl<sub>3</sub>): δ 7.79 (d, *J* = 7.2 Hz, 1H), 7.71-7.63 (m, 1H), 7.55 (d, *J* = 8.3 Hz, 2H), 7.41-7.24 (m, 4H), 7.06 (s, 1H), 3.34-3.17 (m, 1H), 3.12-2.88 (m, 4H), 1.26 (s, 9H). <sup>13</sup>C NMR (125 MHz, CDCl<sub>3</sub>): δ 173.1, 143.0, 142.3, 139.9, 139.5, 129.4, 128.9 (q, *J*<sub>CF</sub> = 32.5 Hz), 125.2 (q, *J*<sub>CF</sub> = 3.8 Hz), 124.2, 123.8, 123.2 (q, *J*<sub>CF</sub> = 292 Hz), 122.9, 122.5, 122.2, 81.1, 49.4, 37.8, 33.2, 27.8. HRMS (ESI) for C<sub>23</sub>H<sub>23</sub>F<sub>3</sub>NaO<sub>2</sub>S [M+Na]<sup>+</sup>: calcd 443.1269, found 443.1265.

HPLC: Chiralpak AD-H column (250 mm); detected at 224 nm; *n*-hexane/*i*-propanol = 95/5; flow = 1.0 mL/min; Retention time: 12.6 min (major), 14.3 min.

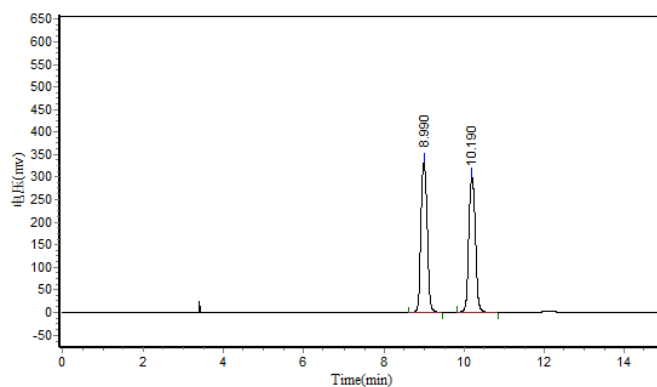

Results

| Peak No.     | Peak ID | Ret Time | Height     | Area        | Conc.    |
|--------------|---------|----------|------------|-------------|----------|
| 1            |         | 8.990    | 331297.438 | 3609549.500 | 51.2075  |
| 2            |         | 10.190   | 298622.219 | 3439316.250 | 48.7925  |
| <b>Total</b> |         |          | 629919.656 | 7048865.750 | 100.0000 |

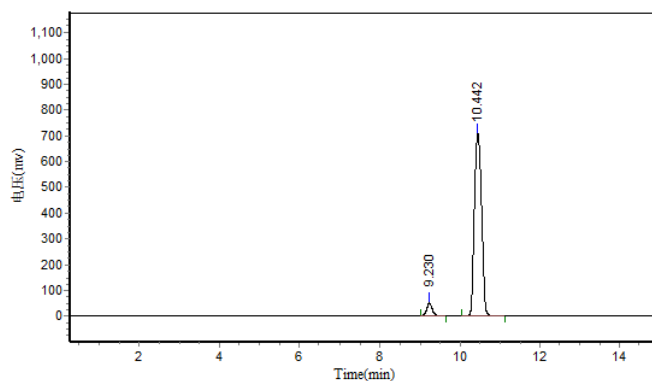

Results

| Peak No.     | Peak ID | Ret Time | Height     | Area        | Conc.    |
|--------------|---------|----------|------------|-------------|----------|
| 1            |         | 9.230    | 50512.469  | 510753.188  | 5.4094   |
| 2            |         | 10.442   | 707657.625 | 8931227.000 | 94.5906  |
| <b>Total</b> |         |          | 758170.094 | 9441980.188 | 100.0000 |

***tert*-butyl (*R*)-3-(benzo[*b*]thiophen-2-yl)-2-(4-bromobenzyl)propanoate (**5k**)**

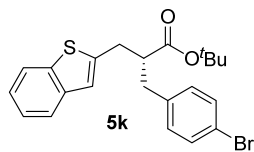

93% yield, light yellow oil, 95% ee.

$^1\text{H}$  NMR (300 MHz,  $\text{CDCl}_3$ ):  $\delta$  7.77 (d,  $J = 7.2$  Hz, 1H), 7.67 (d,  $J = 7.1$  Hz, 1H), 7.41 (d,  $J = 8.1$  Hz, 2H), 7.31 (dd,  $J = 14.6, 7.8$  Hz, 2H), 7.17-6.97 (m, 3H), 3.31-3.16 (m, 1H), 3.09-2.70 (m, 4H), 1.28 (s, 9H).  $^{13}\text{C}$  NMR (125 MHz,  $\text{CDCl}_3$ ):  $\delta$  172.9, 142.1, 139.5, 139.1, 137.5, 131.0, 130.4, 123.8, 123.3, 122.5, 121.9, 121.7, 119.9, 80.6, 49.1, 37.04 32.6, 27.5. HRMS (ESI) for  $\text{C}_{22}\text{H}_{23}\text{BrNaO}_2\text{S}$   $[\text{M}+\text{Na}]^+$ : calcd 453.0500, found 453.0496.

HPLC: Chiralpak AD-3 column (250 mm); detected at 254 nm; *n*-hexane/*i*-propanol = 99/1; flow = 1.0 mL/min; Retention time: 14.5 min, 15.8 min (major).

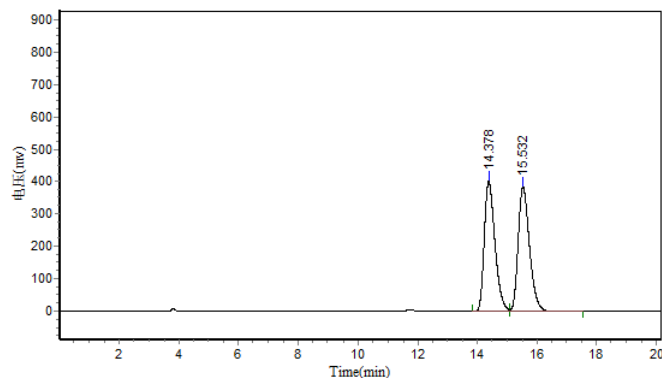

**Results**

| Peak No.     | Peak ID | Ret Time | Height     | Area         | Conc.    |
|--------------|---------|----------|------------|--------------|----------|
| 1            |         | 14.378   | 401877.719 | 10052480.000 | 49.6082  |
| 2            |         | 15.532   | 385048.063 | 10211261.000 | 50.3918  |
| <b>Total</b> |         |          | 786925.781 | 20263741.000 | 100.0000 |

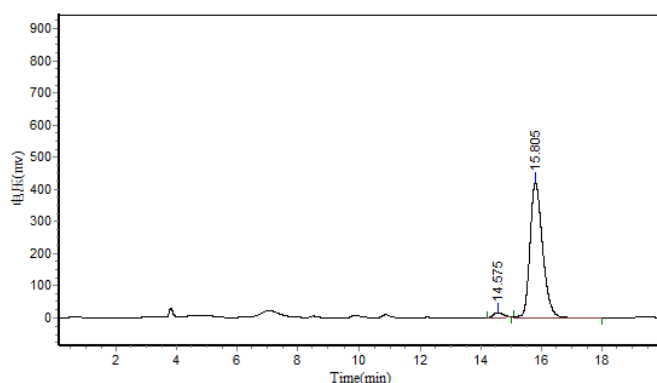

**Results**

| Peak No.     | Peak ID | Ret Time | Height     | Area         | Conc.    |
|--------------|---------|----------|------------|--------------|----------|
| 1            |         | 14.575   | 14770.711  | 331948.250   | 2.6441   |
| 2            |         | 15.805   | 422202.625 | 12222138.000 | 97.3559  |
| <b>Total</b> |         |          | 436973.336 | 12554086.250 | 100.0000 |

***tert*-butyl (*R*)-3-(benzo[*b*]thiophen-2-yl)-2-(naphthalen-1-ylmethyl)propanoate (5I)**

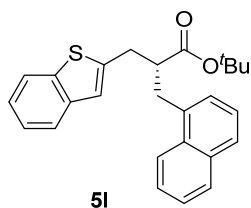

91% yield, light yellow oil, 96% ee.

$^1\text{H NMR}$  (300 MHz,  $\text{CDCl}_3$ ):  $\delta$  7.99 (d,  $J = 5.8$  Hz, 1H), 7.86 (d,  $J = 8.0$  Hz, 1H), 7.77 (d,  $J = 7.3$  Hz, 2H), 7.67 (d,  $J = 7.2$  Hz, 1H), 7.57-7.43 (m, 2H), 7.39 (d,  $J = 6.8$  Hz, 2H), 7.30

(dd,  $J = 14.6, 7.2$  Hz, 2H), 7.06 (s, 1H), 3.44 (dt,  $J = 17.0, 8.6$  Hz, 1H), 3.38-3.25 (m, 2H), 3.25-3.01 (m, 2H), 1.23 (s, 9H).  $^{13}\text{C NMR}$  (125 MHz,  $\text{CDCl}_3$ ):  $\delta$  173.4, 142.4, 139.5, 139.2, 134.5, 133.5, 131.5, 128.4, 127.0, 126.9, 125.6, 125.1, 124.9, 123.7, 123.3, 123.2, 122.5, 121.9, 121.7, 80.4, 48.5, 35.1, 33.0, 27.4. HRMS (ESI) for  $\text{C}_{26}\text{H}_{26}\text{NaO}_2\text{S}$   $[\text{M}+\text{Na}]^+$ : calcd 425.1551, found 425.1546.

HPLC: Chiralcel OD-H column (250 mm); detected at 254 nm; *n*-hexane/*i*-propanol = 99/1; flow = 0.6 mL/min; Retention time: 16.0 min (major), 19.7 min.

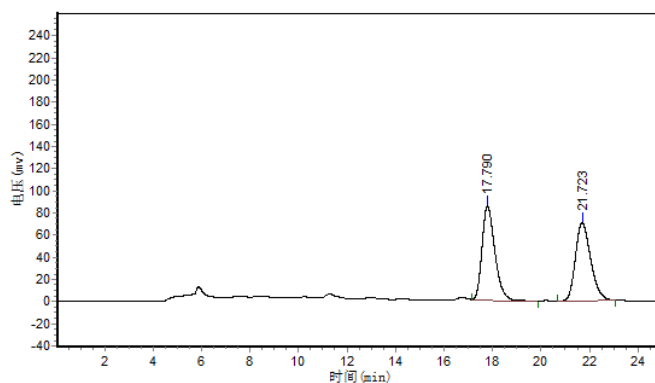

分析结果表

| 峰号 | 峰名 | 保留时间   | 峰高         | 峰面积         | 含量       |
|----|----|--------|------------|-------------|----------|
| 1  |    | 17.790 | 85311.906  | 3170736.750 | 50.0871  |
| 2  |    | 21.723 | 70653.586  | 3159713.750 | 49.9129  |
| 总计 |    |        | 155965.492 | 6330450.500 | 100.0000 |

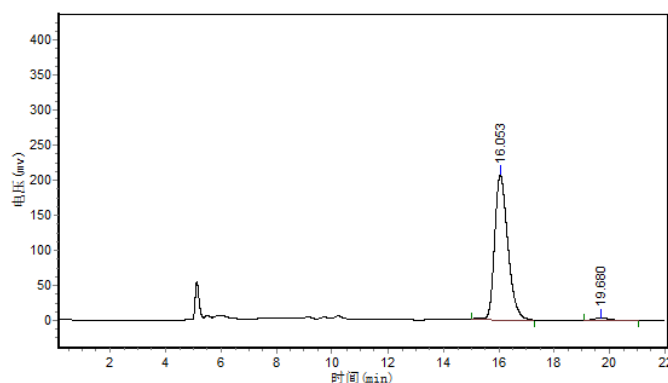

分析结果表

| 峰号 | 峰名 | 保留时间   | 峰高         | 峰面积         | 含量       |
|----|----|--------|------------|-------------|----------|
| 1  |    | 16.053 | 205568.563 | 6829581.000 | 98.0486  |
| 2  |    | 19.680 | 3326.109   | 135923.453  | 1.9514   |
| 总计 |    |        | 208894.672 | 6965504.453 | 100.0000 |



**tert-butyl (R)-3-(benzo[b]thiophen-2-yl)-2-(2-chlorobenzyl)propanoate (5m)**

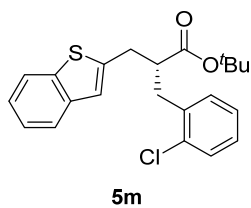

92% yield, light yellow oil, 90% ee.

$^1\text{H}$  NMR (300 MHz,  $\text{CDCl}_3$ ):  $\delta$  7.77 (d,  $J = 7.6$  Hz, 1H), 7.67 (d,  $J = 7.6$  Hz, 1H), 7.41-7.35 (m, 1H), 7.29 (dd,  $J = 8.5, 6.8$  Hz, 3H), 7.21-7.15 (m, 2H), 7.07 (s, 1H), 3.31 (dd,  $J = 14.0, 8.2$  Hz, 1H), 3.25-3.12 (m, 1H), 3.08 (dd,  $J = 13.0, 6.3$  Hz, 3H), 1.26 (s, 9H).  $^{13}\text{C}$  NMR (125 MHz,  $\text{CDCl}_3$ ):  $\delta$  173.4, 142.6, 139.9, 139.6, 136.5, 134.3, 131.4, 129.5, 128.0, 126.6, 124.1, 123.6, 122.8, 122.2, 122.1, 80.8, 47.6, 36.2, 33.3, 27.8. HRMS (ESI) for  $\text{C}_{22}\text{H}_{23}\text{ClNaO}_2\text{S}$   $[\text{M}+\text{Na}]^+$ : calcd 409.1005, found 409.1006.

HPLC: Chiralcel OD-3 column (250 mm); detected at 254 nm; *n*-hexane/*i*-propanol = 99/1; flow = 0.7 mL/min; Retention time: 8.8 min, 9.4 min (major).

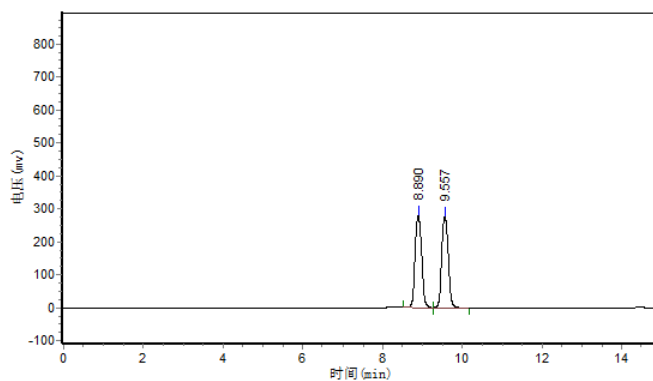

分析结果表

| 峰号 | 峰名 | 保留时间  | 峰高         | 峰面积         | 含量       |
|----|----|-------|------------|-------------|----------|
| 1  |    | 8.890 | 277439.625 | 3218330.500 | 50.2171  |
| 2  |    | 9.557 | 276824.563 | 3190508.000 | 49.7829  |
| 总计 |    |       | 554264.188 | 6408838.500 | 100.0000 |

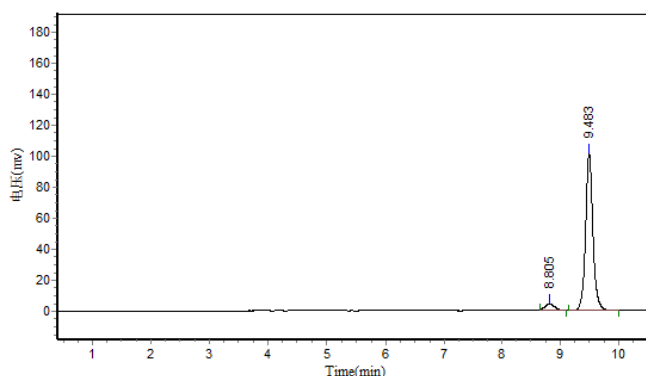

Results

| Peak No. | Peak ID | Ret Time | Height     | Area       | Conc.    |
|----------|---------|----------|------------|------------|----------|
| 1        |         | 8.805    | 3799.218   | 43714.500  | 4.6697   |
| 2        |         | 9.483    | 101726.898 | 892422.375 | 95.3303  |
| Total    |         |          | 105526.116 | 936136.875 | 100.0000 |

**tert-butyl (R)-3-(benzo[b]thiophen-2-yl)-2-(2-methoxybenzyl)propanoate (5n)**

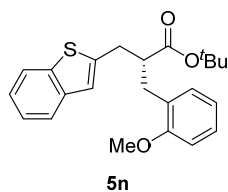

98% yield, light yellow oil, 99% ee.

<sup>1</sup>H NMR (300 MHz, CDCl<sub>3</sub>): δ 7.76 (d, *J* = 7.4 Hz, 1H), 7.66 (d, *J* = 7.7 Hz, 1H), 7.35-7.19 (m, 2H), 7.19-7.10 (m, 2H), 7.05 (s, 1H), 6.87 (t, *J* = 9.1 Hz, 2H), 3.83 (s, 3H), 3.26 (dd, *J* =

14.3, 8.9 Hz, 1H), 3.20-3.08 (m, 1H), 3.02 (dd, *J* = 14.2, 4.8 Hz, 1H), 2.97-2.81 (m, 2H), 1.25 (s, 9H). <sup>13</sup>C NMR (125 MHz, CDCl<sub>3</sub>): δ 173.7, 157.3, 143.0, 139.6, 139.2, 130.5, 127.4, 126.8, 123.6, 123.1, 122.4, 121.6, 121.5, 119.8, 109.8, 80.0, 54.8, 47.2, 45.2, 33.3, 32.8, 27.5. HRMS (ESI) for C<sub>23</sub>H<sub>26</sub>NaO<sub>3</sub>S [M+Na]<sup>+</sup>: calcd 405.1500, found 405.1496.

HPLC: Chiralpak AD-H column (250 mm); detected at 254 nm; *n*-hexane/*i*-propanol = 99/1; flow = 0.6 mL/min; Retention time: 20.6 min (major), 26.8 min.

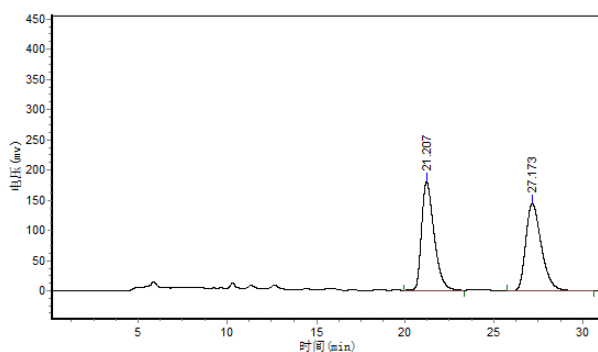

分析结果表

| 峰号 | 峰名 | 保留时间   | 峰高         | 峰面积          | 含量       |
|----|----|--------|------------|--------------|----------|
| 1  |    | 21.207 | 179384.891 | 8858161.000  | 50.3787  |
| 2  |    | 27.173 | 143776.578 | 8724971.000  | 49.6213  |
| 总计 |    |        | 323161.469 | 17583132.000 | 100.0000 |

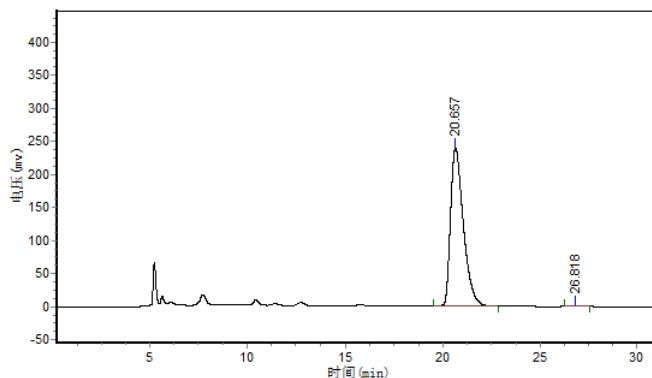

分析结果表

| 峰号 | 峰名 | 保留时间   | 峰高         | 峰面积          | 含量       |
|----|----|--------|------------|--------------|----------|
| 1  |    | 20.657 | 239357.656 | 10986769.000 | 99.4639  |
| 2  |    | 26.818 | 1428.370   | 59215.703    | 0.5361   |
| 总计 |    |        | 240786.026 | 11045984.703 | 100.0000 |

***tert*-butyl (*R*)-3-(benzo[*b*]thiophen-2-yl)-2-(2-methylbenzyl)propanoate (**5o**)**

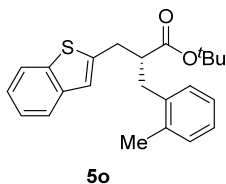

91% yield, light yellow oil, 97% ee.

<sup>1</sup>H NMR (300 MHz, CDCl<sub>3</sub>): δ 7.77 (d, *J* = 7.5 Hz, 1H), 7.67 (d, *J* = 7.6 Hz, 1H), 7.37-7.23 (m, 3H), 7.21-7.14 (m, 3H), 7.05 (s, 1H), 3.36-3.22 (m, 1H), 3.11-2.93 (m, 3H), 2.92-2.80 (m,

1H), 2.52(s, 3H), 1.28 (s, 9H). <sup>13</sup>C NMR (125 MHz, CDCl<sub>3</sub>): δ 173.8, 142.9, 139.9, 139.5, 137.0, 136.3, 130.3, 129.7, 126.5, 125.8, 124.1, 123.6, 122.8, 122.2, 122.1, 80.7, 48.3, 35.8, 33.2, 27.8, 19.5. HRMS (ESI) for C<sub>23</sub>H<sub>26</sub>NaO<sub>2</sub>S [M+Na]<sup>+</sup>: calcd 389.1551, found 389.1550.

HPLC: Chiralcel OD-3 column (250 mm); detected at 224 nm; *n*-hexane/*i*-propanol = 99/1; flow = 0.7 mL/min; Retention time: 9.3 min, 10.2 min (major).

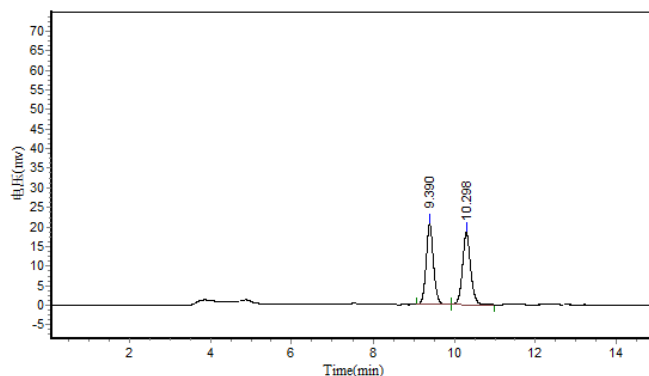

Results

| Peak No.     | Peak ID | Ret Time | Height    | Area       | Conc.    |
|--------------|---------|----------|-----------|------------|----------|
| 1            |         | 9.390    | 20706.047 | 260903.656 | 50.3254  |
| 2            |         | 10.298   | 18426.400 | 257529.953 | 49.6746  |
| <b>Total</b> |         |          | 39132.447 | 518433.609 | 100.0000 |

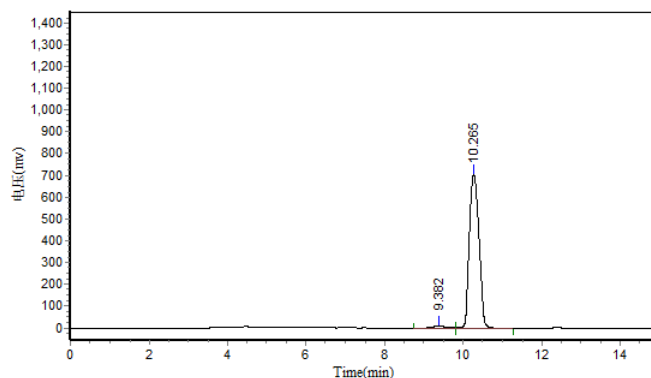

Results

| Peak No.     | Peak ID | Ret Time | Height     | Area         | Conc.    |
|--------------|---------|----------|------------|--------------|----------|
| 1            |         | 9.382    | 9923.603   | 188384.203   | 1.5364   |
| 2            |         | 10.265   | 701285.563 | 12072746.000 | 98.4636  |
| <b>Total</b> |         |          | 711209.165 | 12261130.203 | 100.0000 |

***tert*-butyl (*R*)-3-([1,1'-biphenyl]-4-yl)-2-(benzo[*b*]thiophen-2-ylmethyl)propanoate (5p)**

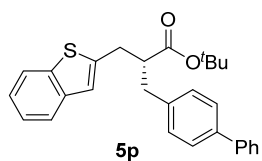

99% yield, light yellow oil, 96% ee.

$^1\text{H}$  NMR (300 MHz,  $\text{CDCl}_3$ ):  $\delta$  7.79 (d,  $J = 7.5$  Hz, 1H), 7.68 (d,  $J = 7.2$  Hz, 1H), 7.60 (d,  $J = 7.5$  Hz, 2H), 7.54 (d,  $J = 6.7$  Hz, 2H), 7.45 (t,  $J = 7.4$  Hz, 2H), 7.40-7.23 (m, 5H), 7.07 (s, 1H), 3.37-3.17 (m, 1H), 3.04 (dd,  $J = 22.0, 10.5$  Hz, 3H), 2.92 (dd,  $J = 17.0, 10.4$  Hz, 1H), 1.30 (s, 9H).  $^{13}\text{C}$  NMR (125 MHz,  $\text{CDCl}_3$ ):  $\delta$  173.2, 142.5, 140.6, 139.6, 139.2, 138.9, 137.5, 129.1, 128.3, 126.7, 126.6, 126.5, 123.7, 123.3, 122.5, 121.8, 121.7, 80.4, 49.3, 37.5, 32.6, 27.5. HRMS (ESI) for  $\text{C}_{28}\text{H}_{28}\text{NaO}_2\text{S}$   $[\text{M}+\text{Na}]^+$ : calcd 451.1708, found 451.1706. HPLC: Chiralpak AD-3 column (250 mm); detected at 224 nm; *n*-hexane/*i*-propanol = 90/10; flow = 0.5 mL/min; Retention time: 17.2 min (major), 18.5 min.

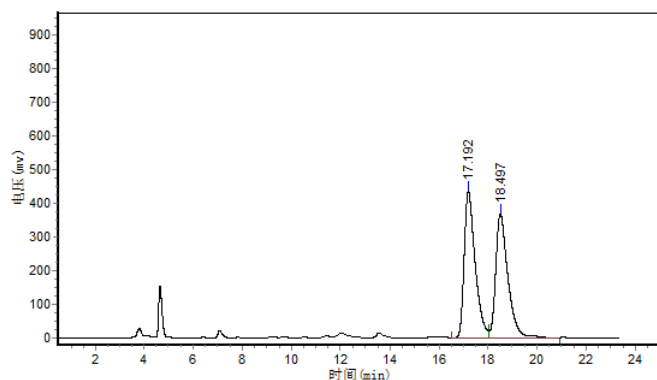

分析结果表

| 峰号 | 峰名 | 保留时间   | 峰高         | 峰面积          | 含量       |
|----|----|--------|------------|--------------|----------|
| 1  |    | 17.192 | 434398.469 | 13437980.000 | 51.5285  |
| 2  |    | 18.497 | 368400.063 | 12640748.000 | 48.4715  |
| 总计 |    |        | 802798.531 | 26078728.000 | 100.0000 |

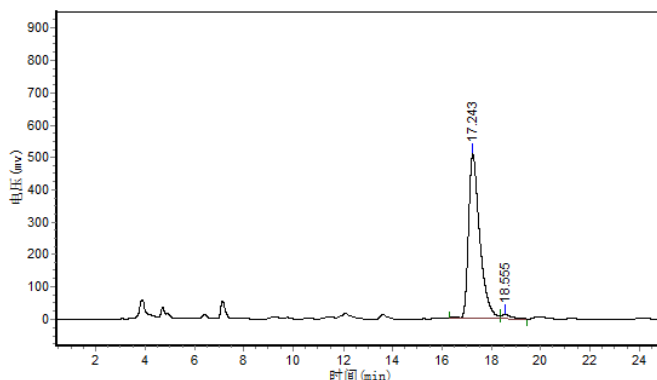

分析结果表

| 峰号 | 峰名 | 保留时间   | 峰高         | 峰面积          | 含量       |
|----|----|--------|------------|--------------|----------|
| 1  |    | 17.243 | 508001.000 | 16061972.000 | 97.7840  |
| 2  |    | 18.555 | 11757.348  | 363994.094   | 2.2160   |
| 总计 |    |        | 519758.348 | 16425966.094 | 100.0000 |

***tert*-butyl (*R*)-3-(benzofuran-2-yl)-2-(4-methoxybenzyl)propanoate (5q)**

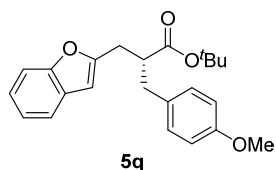

93% yield, light yellow oil, 90% ee.

$^1\text{H}$  NMR (300 MHz,  $\text{CDCl}_3$ ):  $\delta$  7.46 (d,  $J = 7.3$  Hz, 1H), 7.38 (d,  $J = 7.5$  Hz, 1H), 7.21-7.13 (m, 2H), 7.10 (d,  $J = 8.5$  Hz, 2H), 6.80 (d,  $J = 8.6$  Hz, 2H), 6.41 (s, 1H), 3.76 (s, 3H), 2.97 (dt,  $J = 25.6, 12.5$  Hz, 4H), 2.82-2.69 (m, 1H), 1.27 (s, 9H).  $^{13}\text{C}$  NMR (125 MHz,  $\text{CDCl}_3$ ):  $\delta$  173.3, 157.8, 156.1, 154.3, 130.4, 129.7, 128.3, 122.9, 122.0, 119.9, 113.3, 110.3, 103.0, 80.2, 54.8, 46.7, 36.9, 30.3, 27.5. HRMS (ESI) for  $\text{C}_{23}\text{H}_{26}\text{NaO}_4$   $[\text{M}+\text{Na}]^+$ : calcd 389.1729, found 389.1724.

HPLC: Chiralpak IC column (250 mm); detected at 254 nm; *n*-hexane/*i*-propanol = 99/1; flow = 0.7 mL/min; Retention time: 25.0 min (major), 30.6 min.

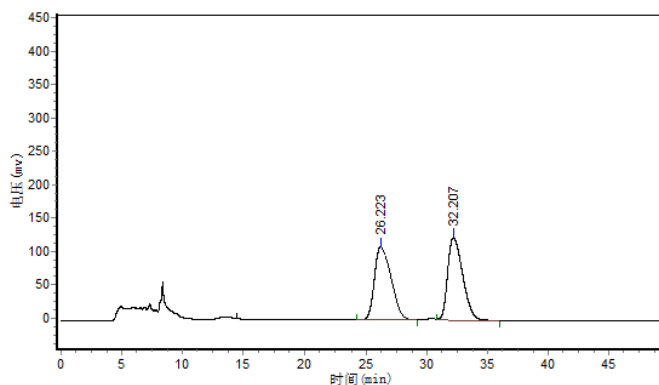

分析结果表

| 峰号 | 峰名 | 保留时间   | 峰高         | 峰面积          | 含量       |
|----|----|--------|------------|--------------|----------|
| 1  |    | 26.223 | 109645.859 | 10523389.000 | 50.2935  |
| 2  |    | 32.207 | 122211.547 | 10400568.000 | 49.7065  |
| 总计 |    |        | 231857.406 | 20923957.000 | 100.0000 |

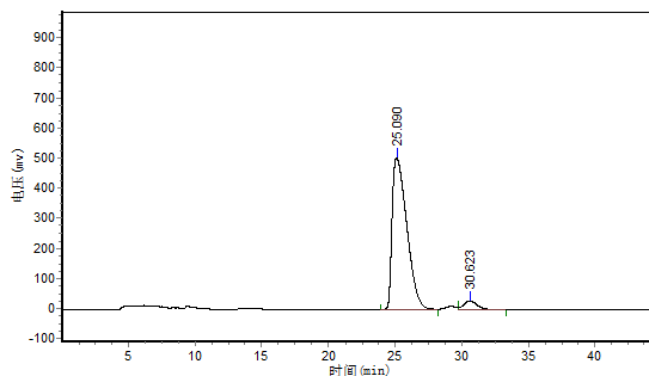

分析结果表

| 峰号 | 峰名 | 保留时间   | 峰高         | 峰面积          | 含量       |
|----|----|--------|------------|--------------|----------|
| 1  |    | 25.090 | 504321.938 | 38741300.000 | 95.0576  |
| 2  |    | 30.623 | 28637.494  | 2014292.625  | 4.9424   |
| 总计 |    |        | 532959.432 | 40755592.625 | 100.0000 |

***tert*-butyl (*R*)-2-(3-(*tert*-butoxy)-2-(4-methoxybenzyl)-3-oxopropyl)-1*H*-indole-1-carboxylate (**5r**)**

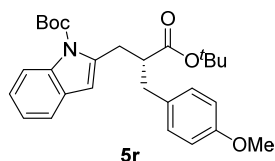

92% yield, light yellow oil, 97% ee.

$^1\text{H}$  NMR (300 MHz,  $\text{CDCl}_3$ ):  $\delta$  8.08 (d,  $J = 8.2$  Hz, 1H), 7.44 (d,  $J = 7.2$  Hz, 1H), 7.25-7.16 (m, 2H), 7.12 (d,  $J = 8.4$  Hz, 2H), 6.81 (d,  $J = 8.6$  Hz, 2H), 6.41 (s, 1H), 3.78 (s, 3H), 3.29 (dd,  $J = 20.3, 10.7$  Hz, 2H), 3.05 (m, 1H), 2.87 (dt,  $J = 13.7, 10.7$  Hz, 2H), 1.70 (s, 9H), 1.19 (s, 9H).  $^{13}\text{C}$  NMR (126 MHz,  $\text{CDCl}_3$ ):  $\delta$  174.3, 158.2, 150.5, 139.0, 136.7, 131.2, 130.0, 129.1, 123.5, 122.6, 119.8, 115.5, 113.6, 108.6, 83.8, 80.4, 55.3, 47.7, 38.2, 33.0, 28.3, 27.8. HRMS (ESI) for  $\text{C}_{28}\text{H}_{35}\text{NNaO}_5$   $[\text{M}+\text{Na}]^+$ : calcd 488.2413, found 488.2409.

HPLC: Chiralcel OD-H column (250 mm); detected at 224 nm; *n*-hexane/*i*-propanol = 99/1; flow = 0.7 mL/min; Retention time: 8.3 min (major), 14.5 min.

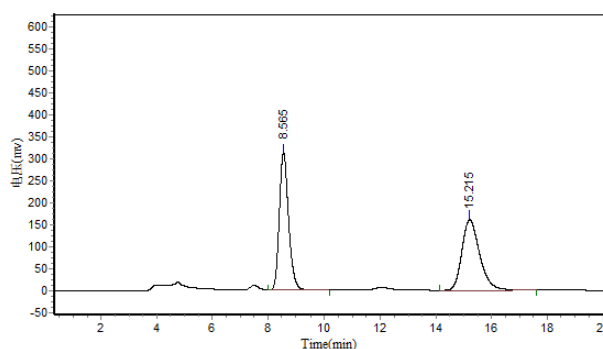

| Results      |         |          |            |              |          |
|--------------|---------|----------|------------|--------------|----------|
| Peak No.     | Peak ID | Ret Time | Height     | Area         | Conc.    |
| 1            |         | 8.565    | 311206.375 | 7229826.500  | 50.1628  |
| 2            |         | 15.215   | 160345.781 | 7182886.500  | 49.8372  |
| <b>Total</b> |         |          | 471552.156 | 14412713.000 | 100.0000 |

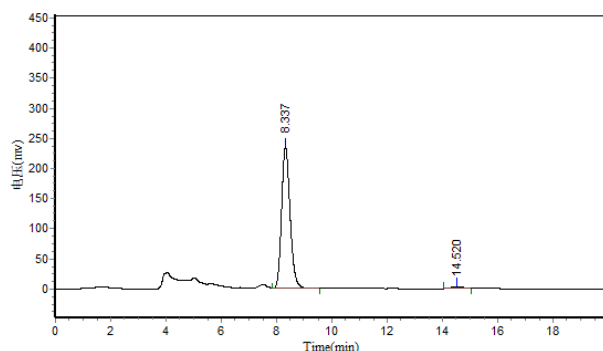

| Results      |         |          |            |             |          |
|--------------|---------|----------|------------|-------------|----------|
| Peak No.     | Peak ID | Ret Time | Height     | Area        | Conc.    |
| 1            |         | 8.337    | 233647.516 | 5038195.500 | 98.5283  |
| 2            |         | 14.520   | 2420.783   | 75256.453   | 1.4717   |
| <b>Total</b> |         |          | 236068.299 | 5113451.953 | 100.0000 |

## 7. Construction of compound 7

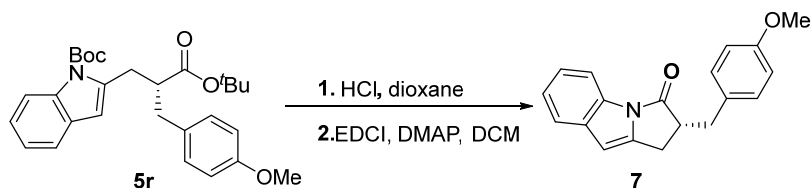

A 10 mL vessel was charged with the product **5r** (46.5 mg, 0.10 mmol, 97% ee) in 4 mL HCl/dioxane and the mixture was stirred at room temperature for 3 hours. After the reaction was completed, saturated Na<sub>2</sub>CO<sub>3</sub> was added to the system and was extracted with EtOAc (2x10 mL). The combined organic layers were dried on anhydrous Na<sub>2</sub>SO<sub>4</sub>, filtered, and removed under vacuum and the residue was used for next step directly. To the above residue was added dichloromethane (5 mL), EDCI (29 mg, 0.15 mmol), 4-dimethylaminopyridine (25 mg, 0.20 mmol) and the solution was stirred for 12 h at room temperature. After solvent evaporation, the crude compound was purified by column chromatography over silica gel to furnish the desired cyclic product (**R**)-2-(4-methoxybenzyl)-1,2-dihydro-3H-pyrrolo[1,2-a]indol-3-one (**7**): 88% yield, light yellow oil, 97% ee. <sup>1</sup>H NMR (300 MHz, CDCl<sub>3</sub>) δ 8.10 (d, *J* = 8.8 Hz, 1H), 7.49 (d, *J* = 8.6 Hz, 1H), 7.31-7.26 (m, 2H), 7.18 (d, *J* = 8.6 Hz, 2H), 6.85 (d, *J* = 8.6 Hz, 2H), 6.22 (s, 1H), 3.79 (s, 3H), 3.47 (dd, *J* = 9.0, 4.6 Hz, 1H), 3.34 (dd, *J* = 14.1, 4.3 Hz, 1H), 3.17 (dd, *J* = 17.7, 9.1 Hz, 1H), 2.90 (dd, *J* = 14.2, 9.1 Hz, 2H). <sup>13</sup>C NMR (125 MHz, CDCl<sub>3</sub>) δ 172.9, 158.0, 141.6, 134.8, 130.0, 129.7, 129.5, 123.6, 122.8, 120.0, 113.7, 113.3, 100.0, 54.8, 48.0, 35.8, 24.9. HRMS (ESI) for C<sub>19</sub>H<sub>17</sub>NNaO<sub>2</sub> [M+Na]<sup>+</sup>: calcd 314.1157, found 314.1154.

HPLC: Chiralcel AD-H column (250 mm); detected at 254 nm; *n*-hexane/*i*-propanol = 90/10; flow = 0.7 mL/min; Retention time: 10.9 min (major), 11.3 min.

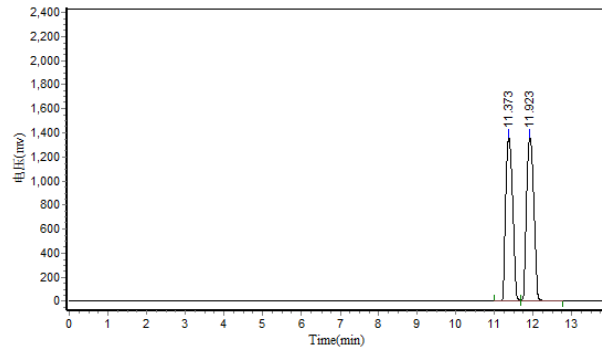

**Results**

| Peak No.     | Peak ID | Ret Time | Height      | Area         | Conc.    |
|--------------|---------|----------|-------------|--------------|----------|
| 1            |         | 11.373   | 1356207.125 | 17177762.000 | 48.8248  |
| 2            |         | 11.923   | 1359109.500 | 18004666.000 | 51.1752  |
| <b>Total</b> |         |          | 2715316.625 | 35182428.000 | 100.0000 |

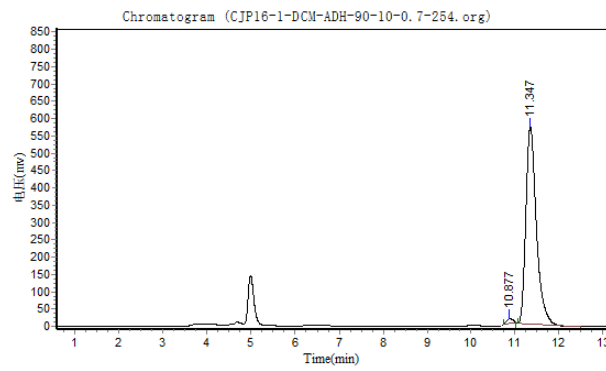

**Results**

| Peak No.     | Peak ID | Ret Time | Height     | Area        | Conc.    |
|--------------|---------|----------|------------|-------------|----------|
| 1            |         | 10.877   | 13934.208  | 136140.484  | 1.4324   |
| 2            |         | 11.347   | 567769.625 | 9368122.000 | 98.5676  |
| <b>Total</b> |         |          | 581703.833 | 9504262.484 | 100.0000 |



## 8. Copies of $^1\text{H}$ NMR and $^{13}\text{C}$ NMR spectra of products 3-7

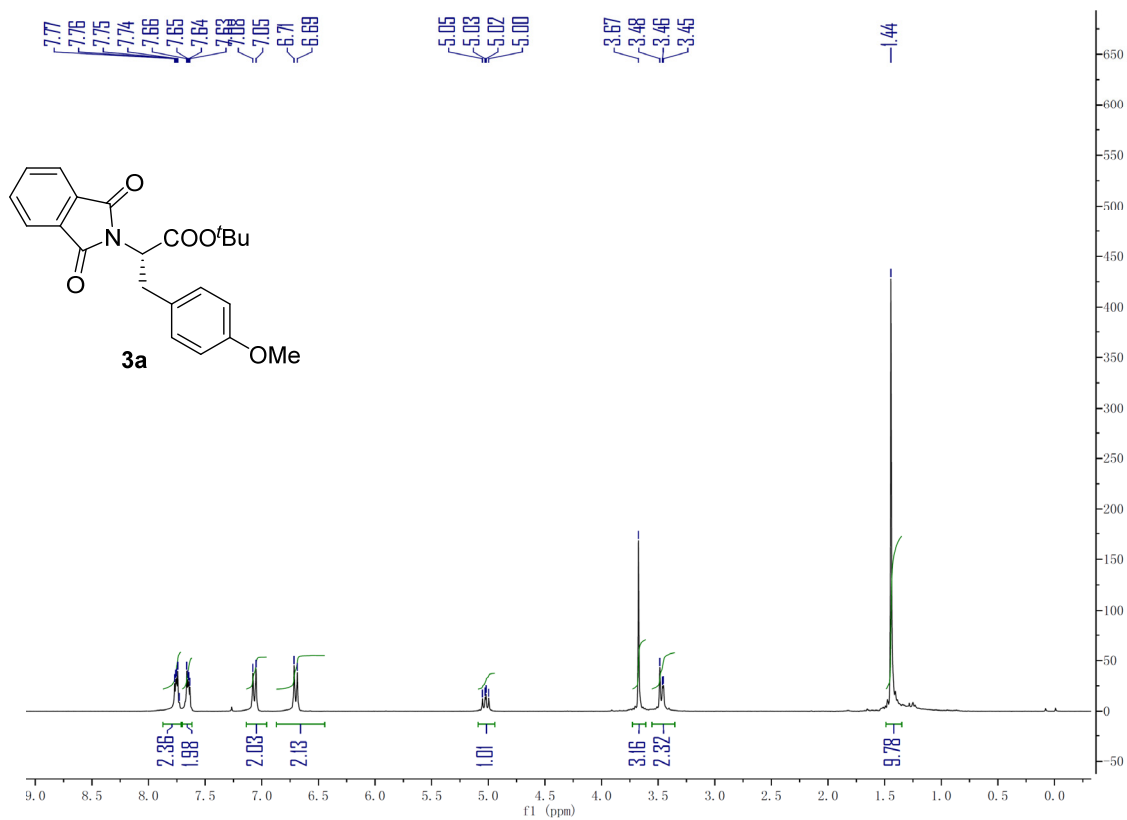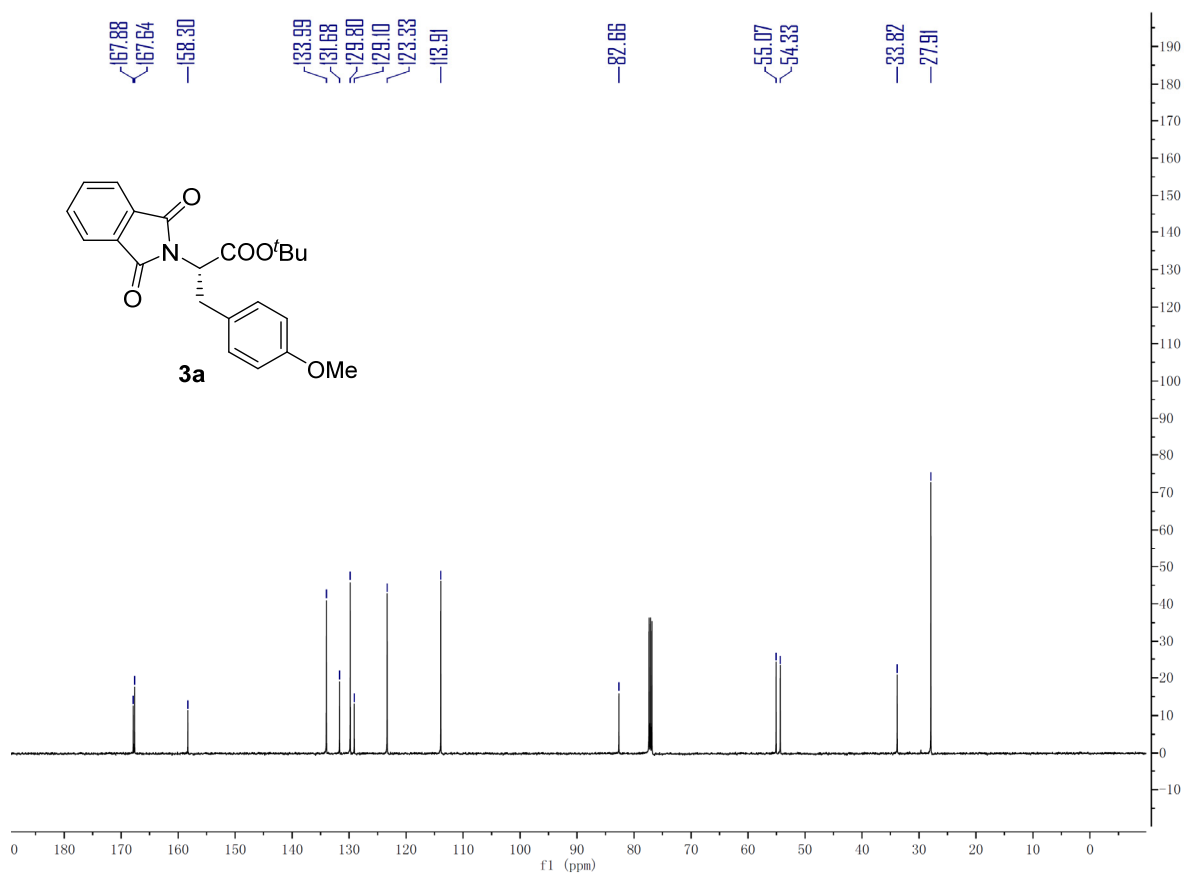

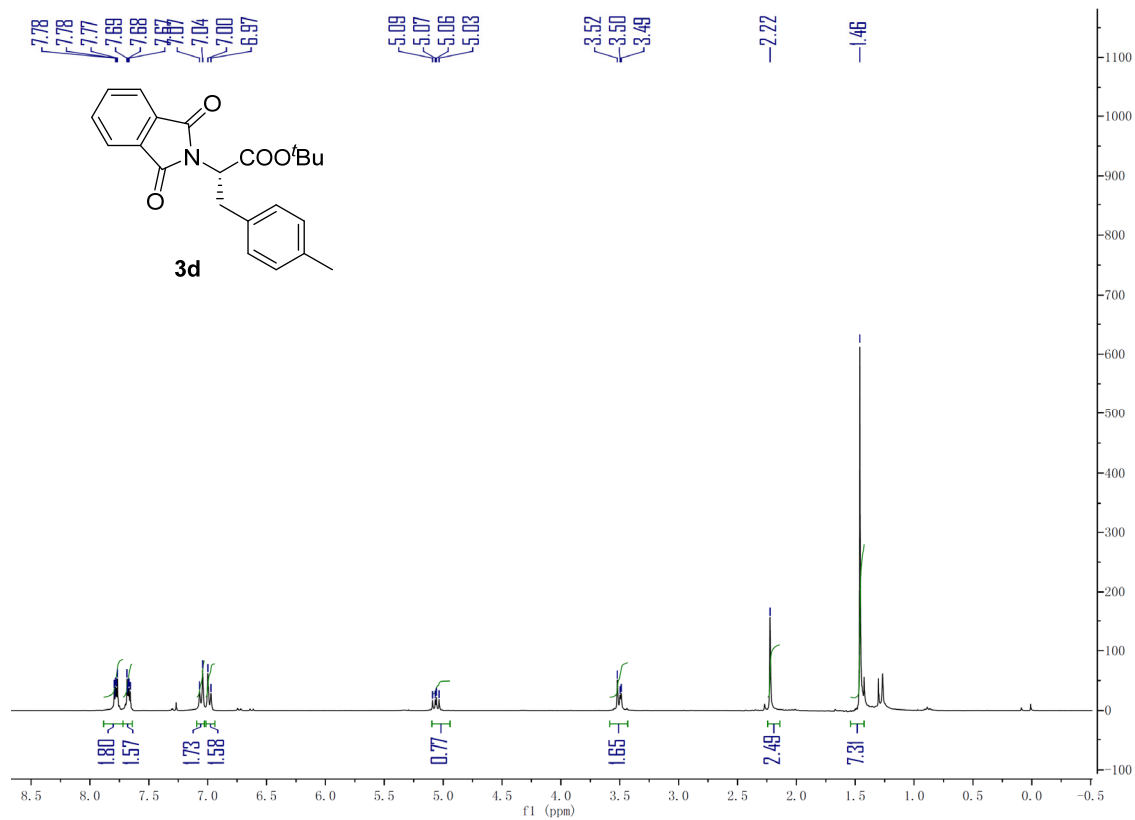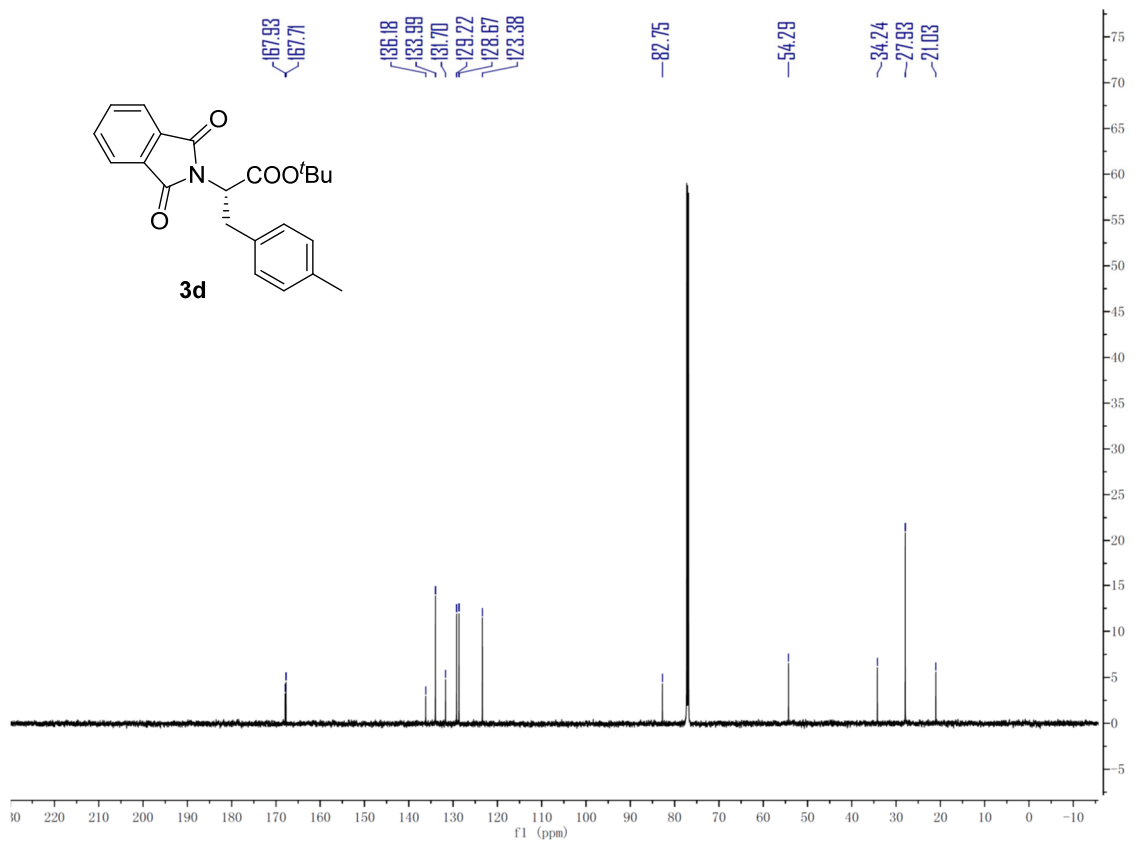

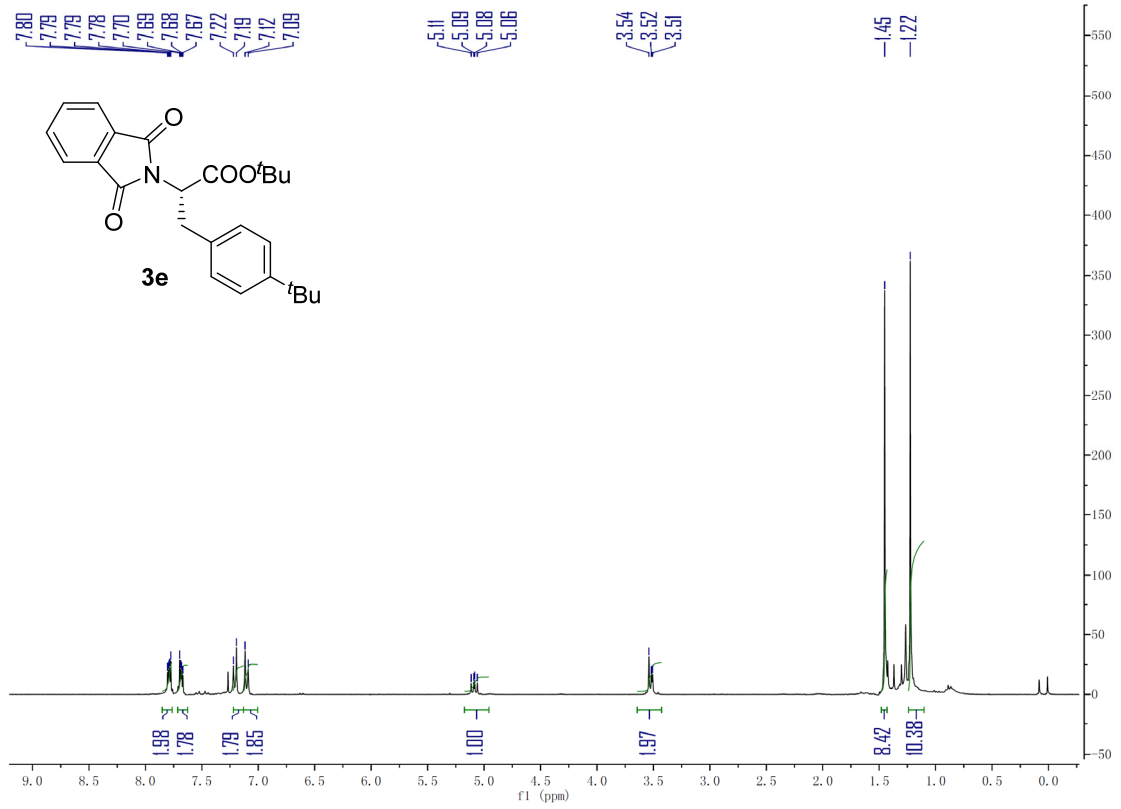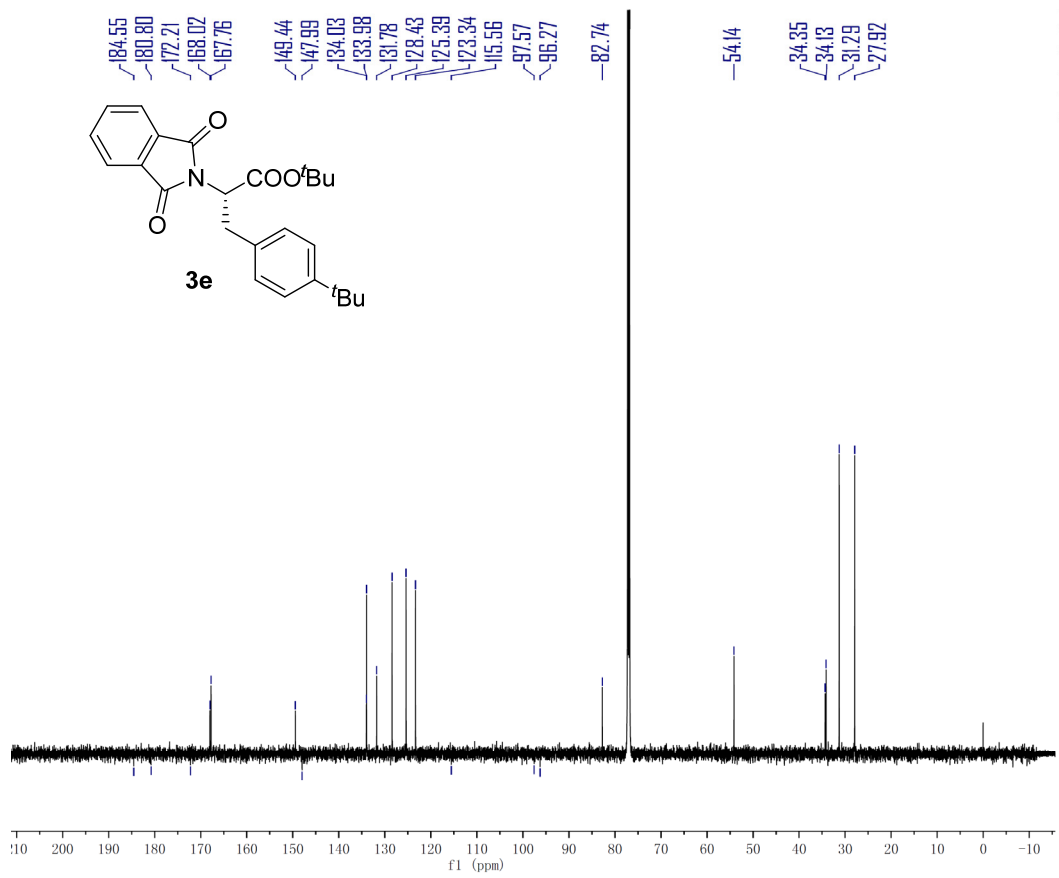

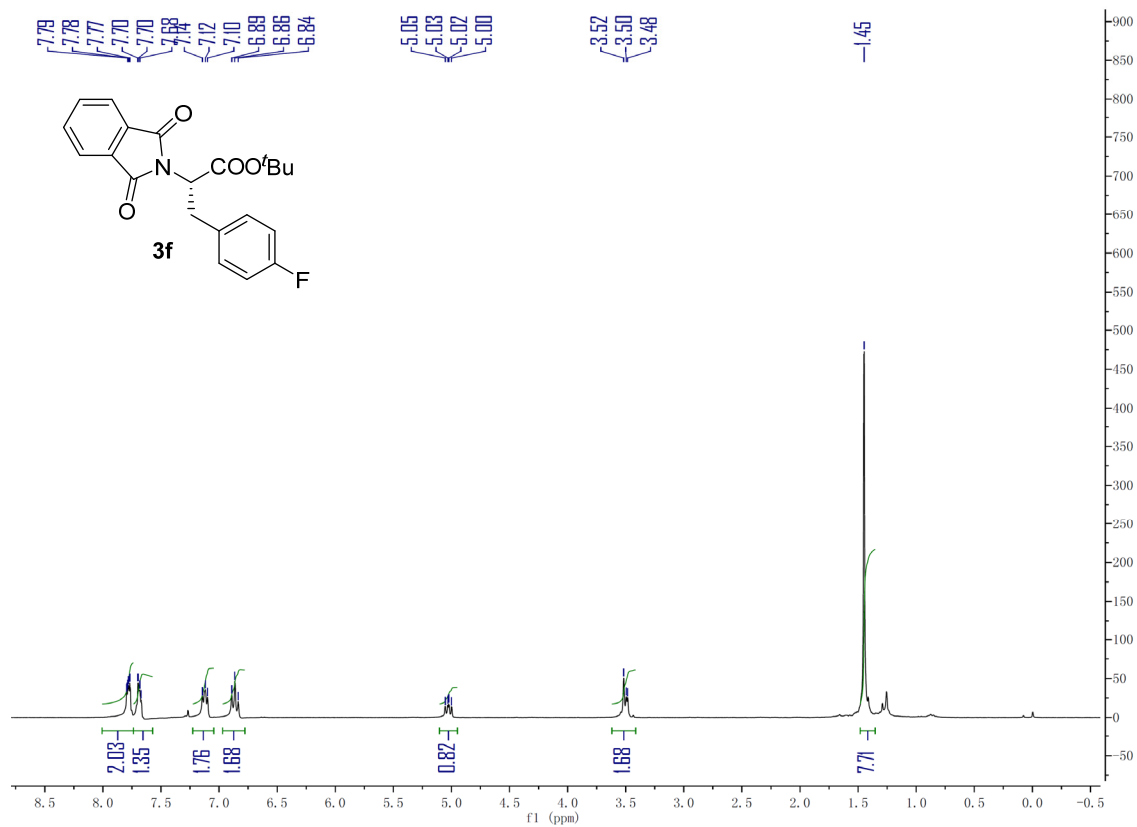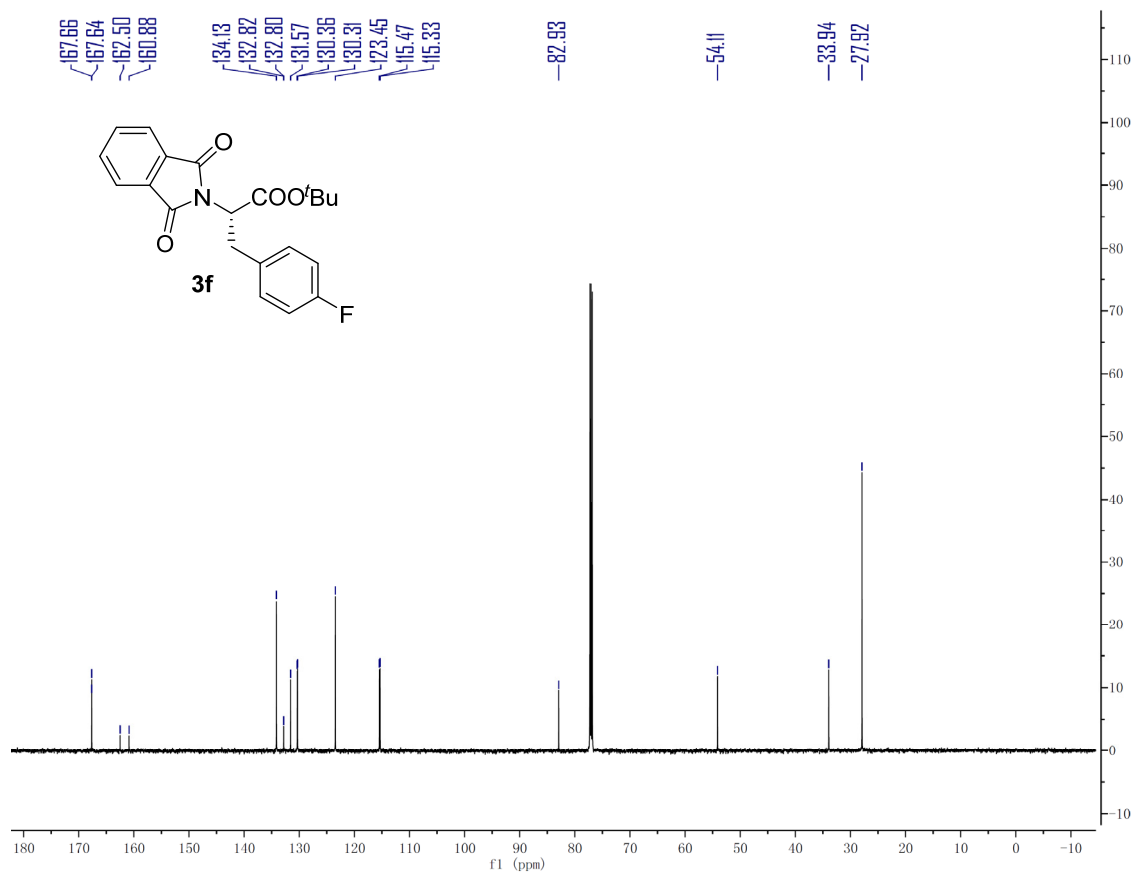

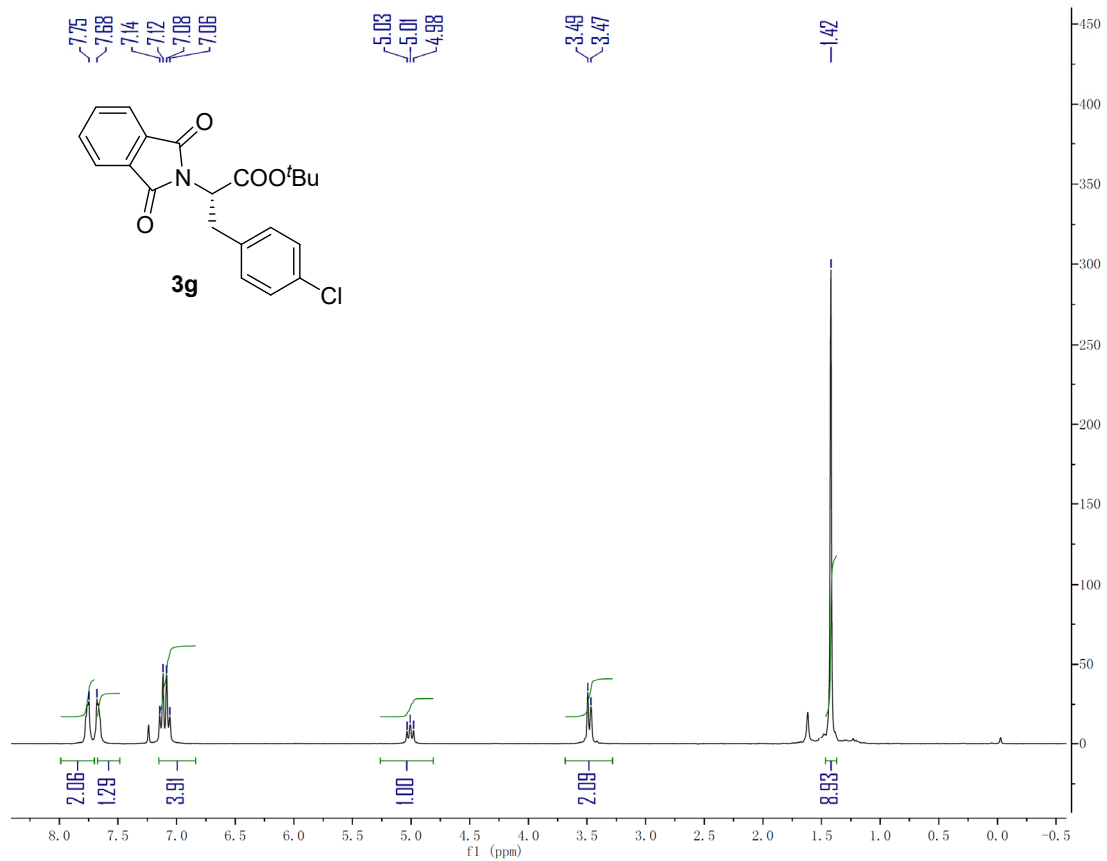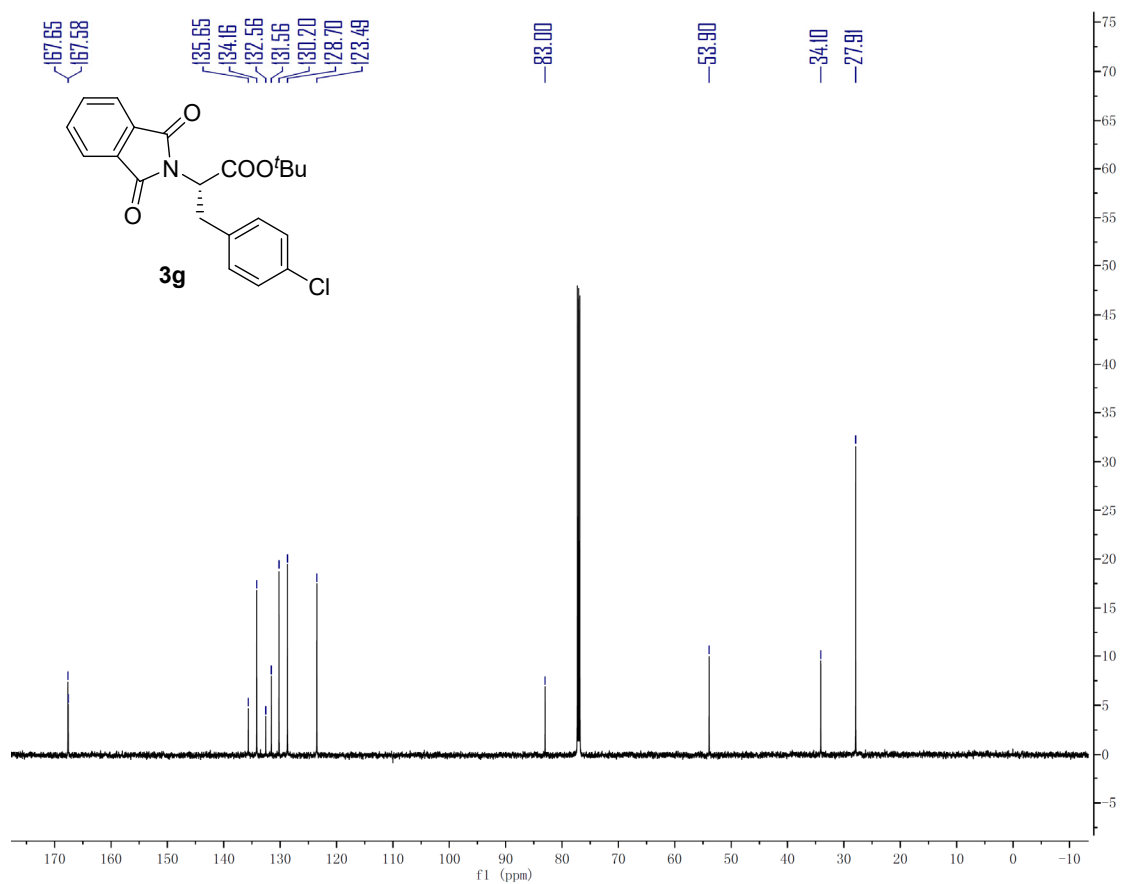

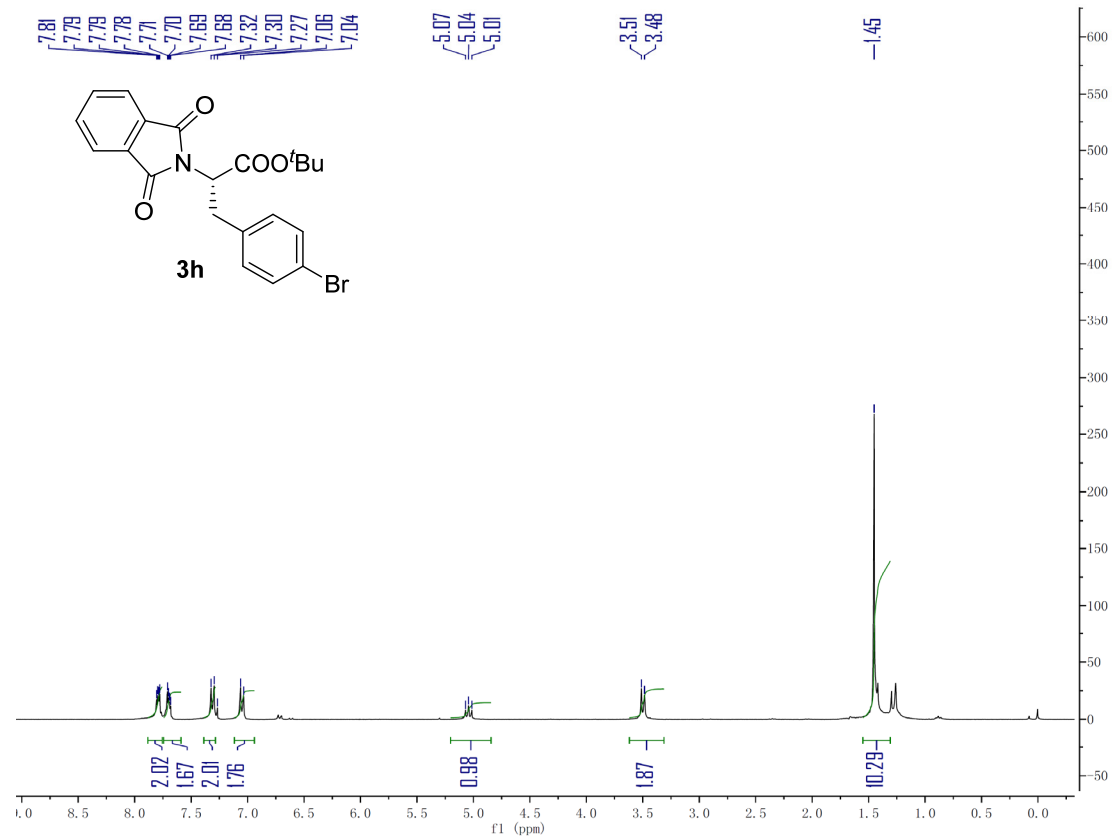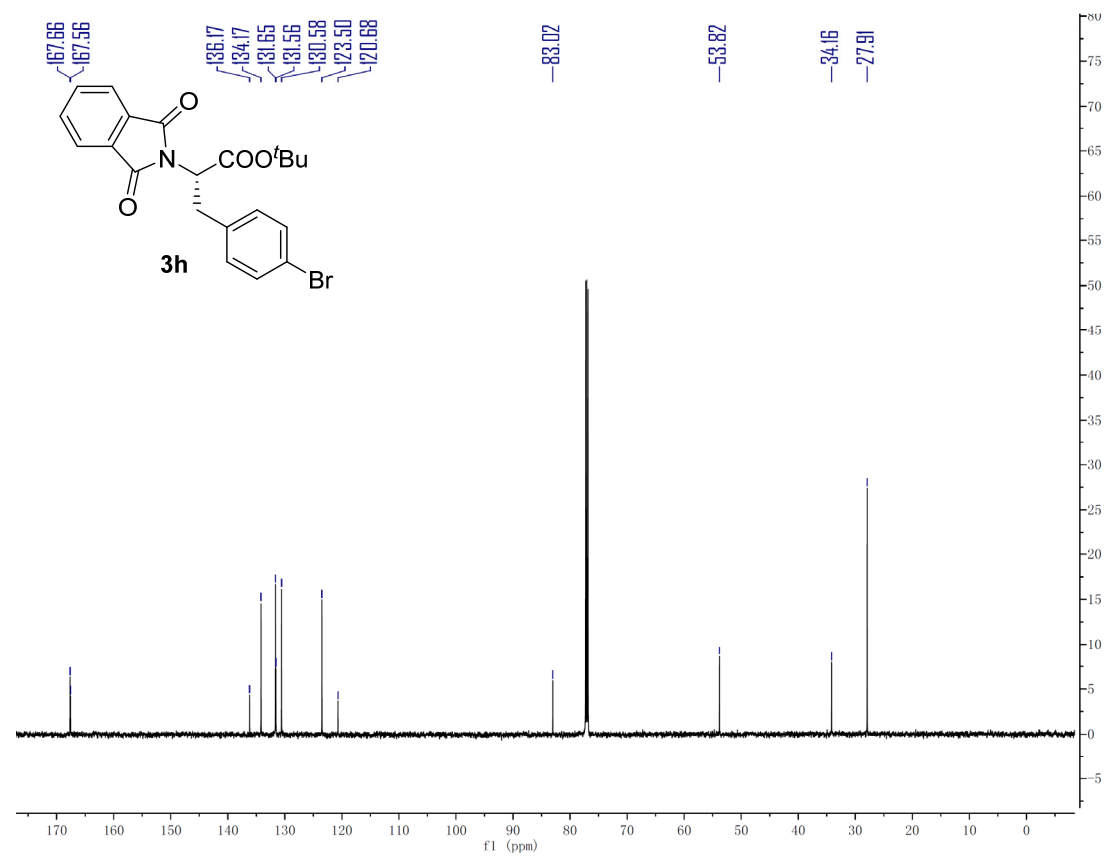

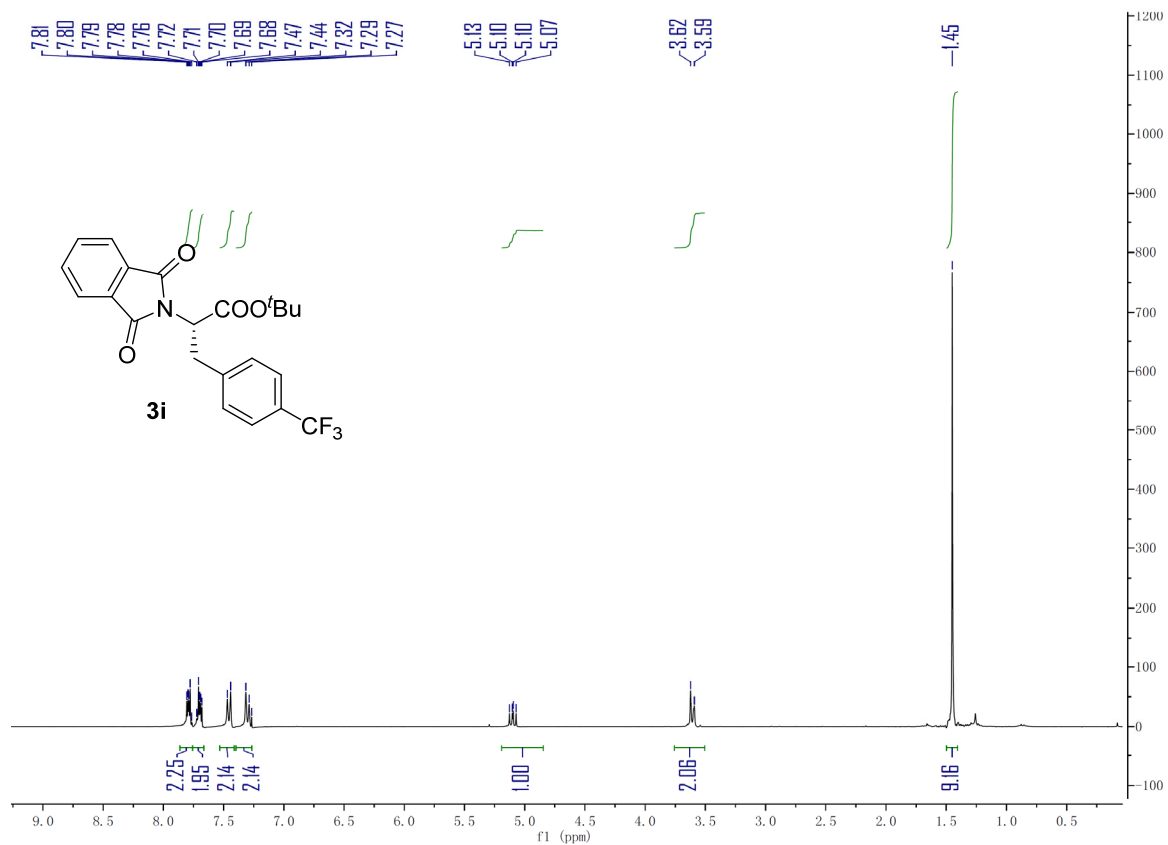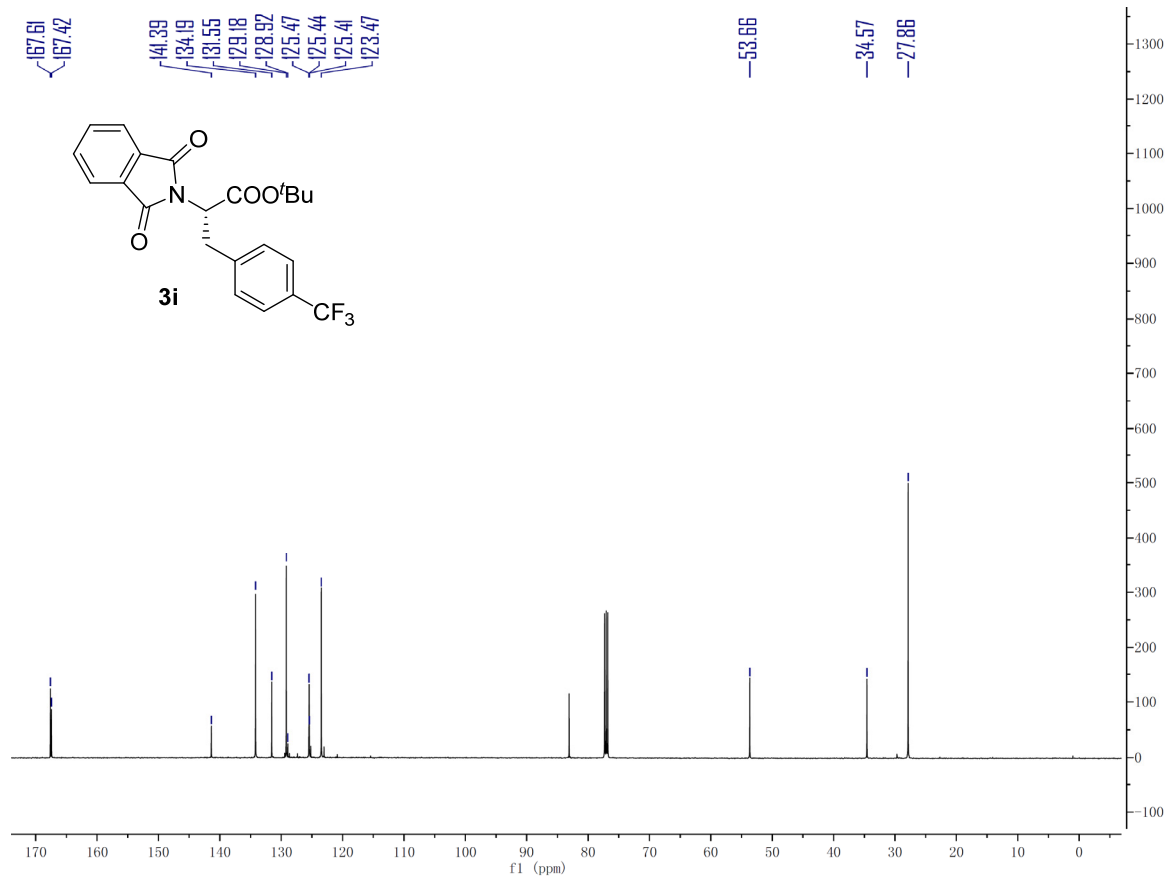

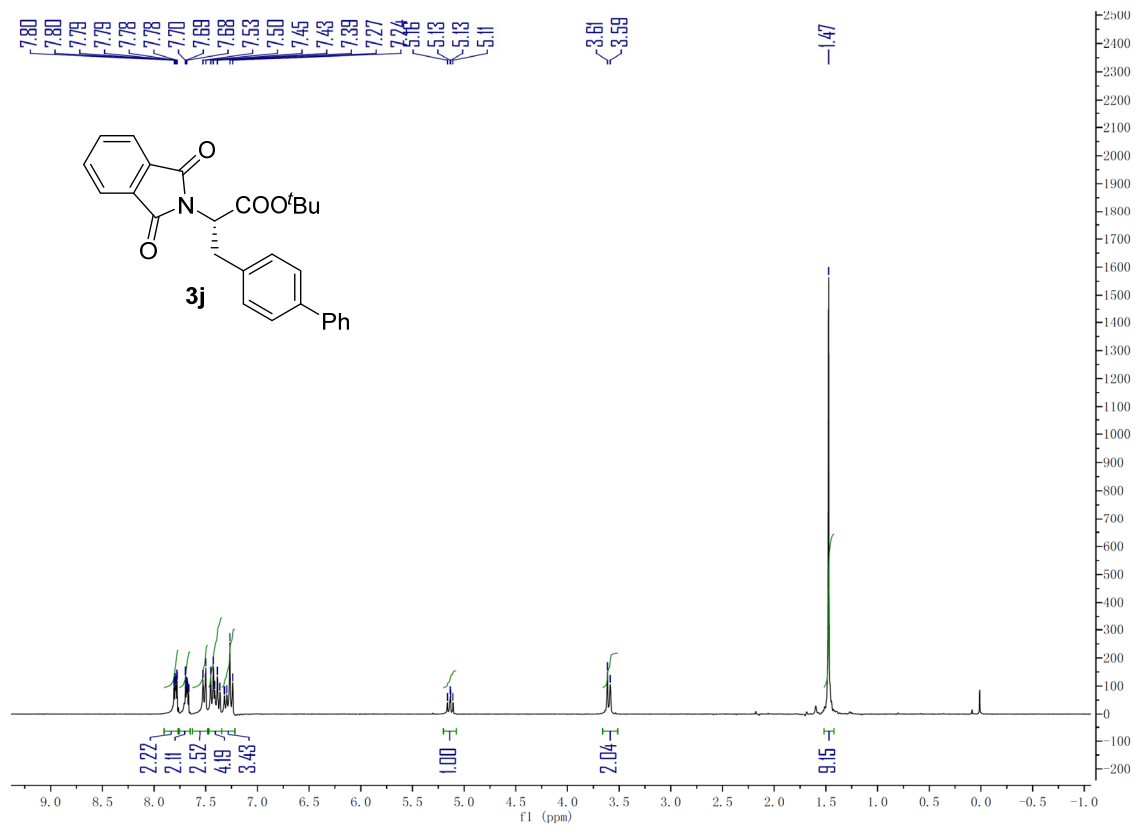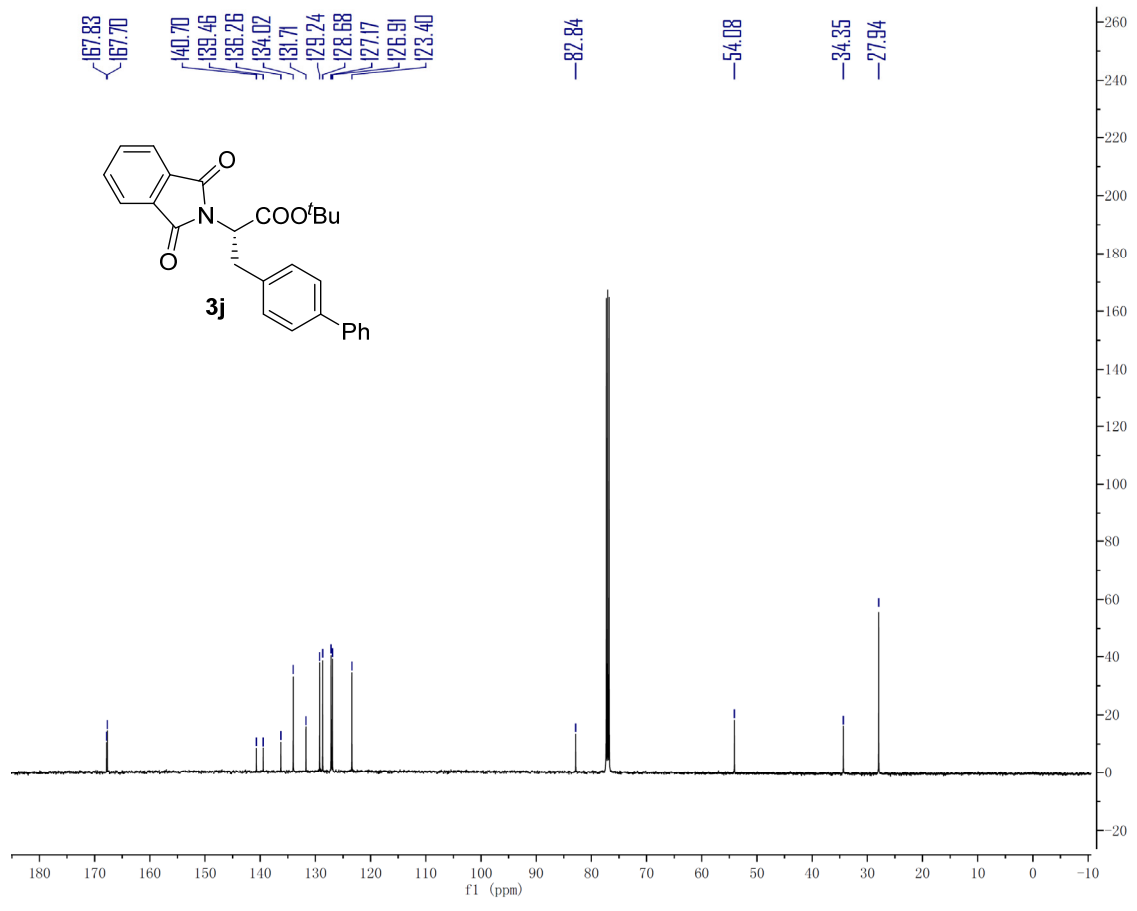



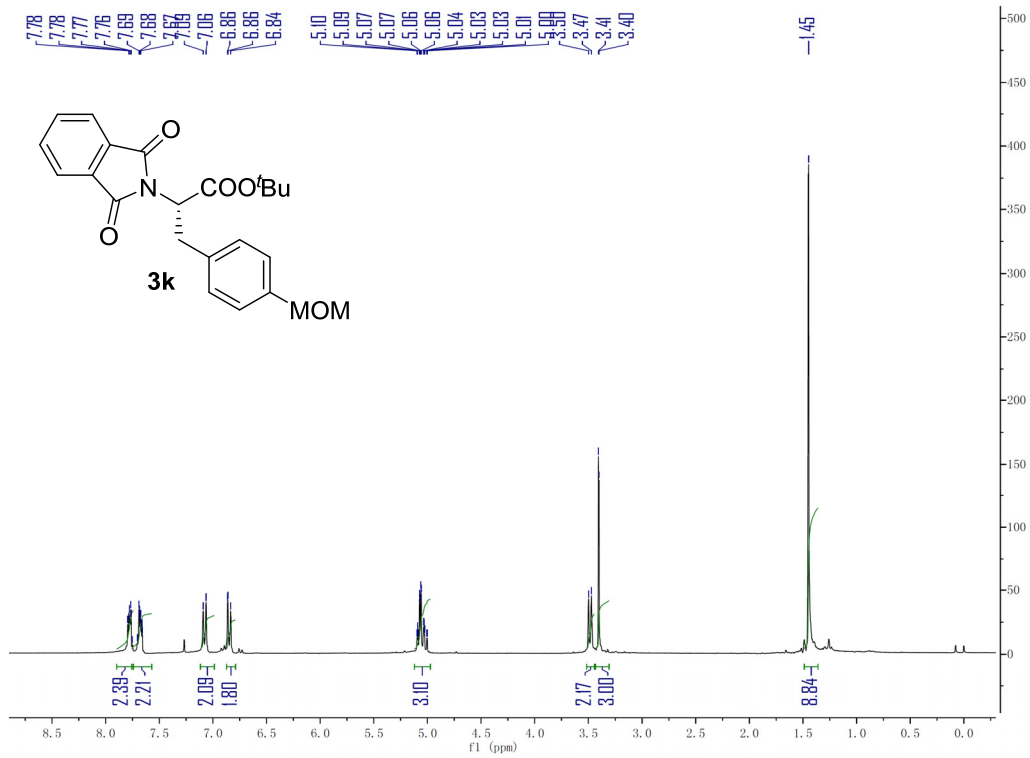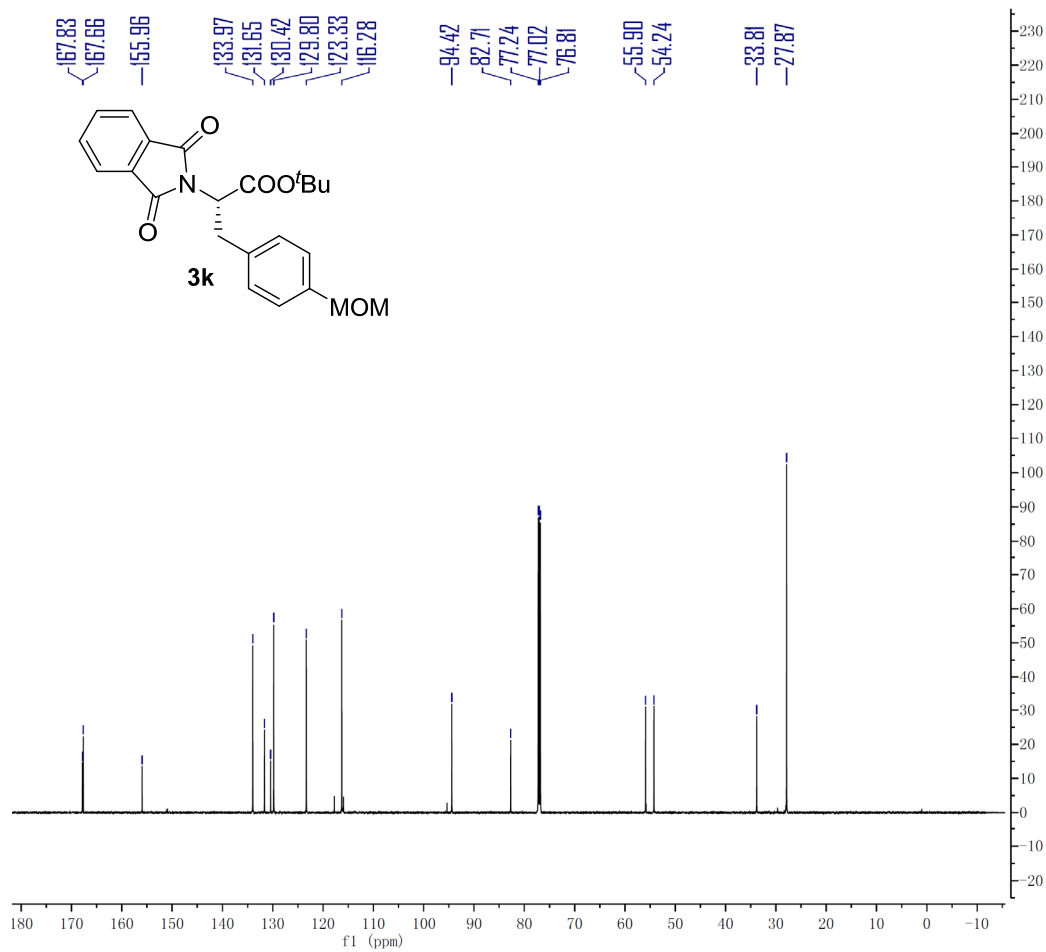

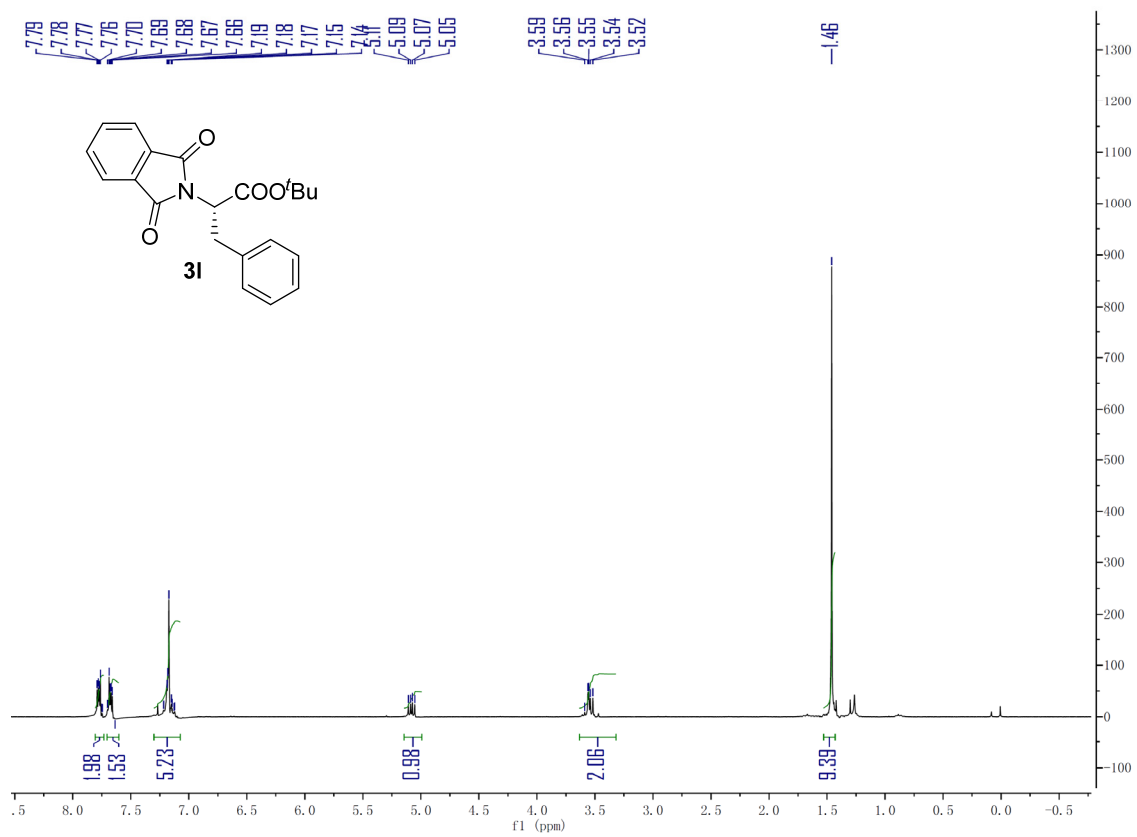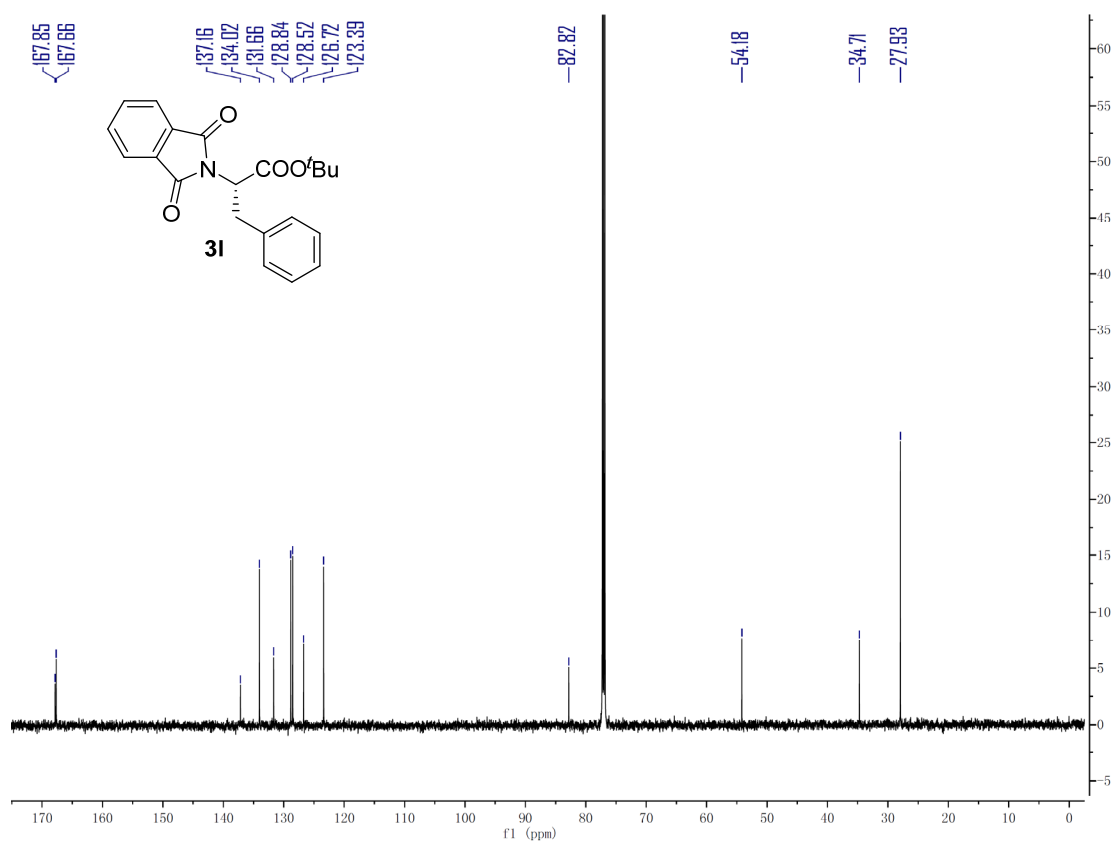

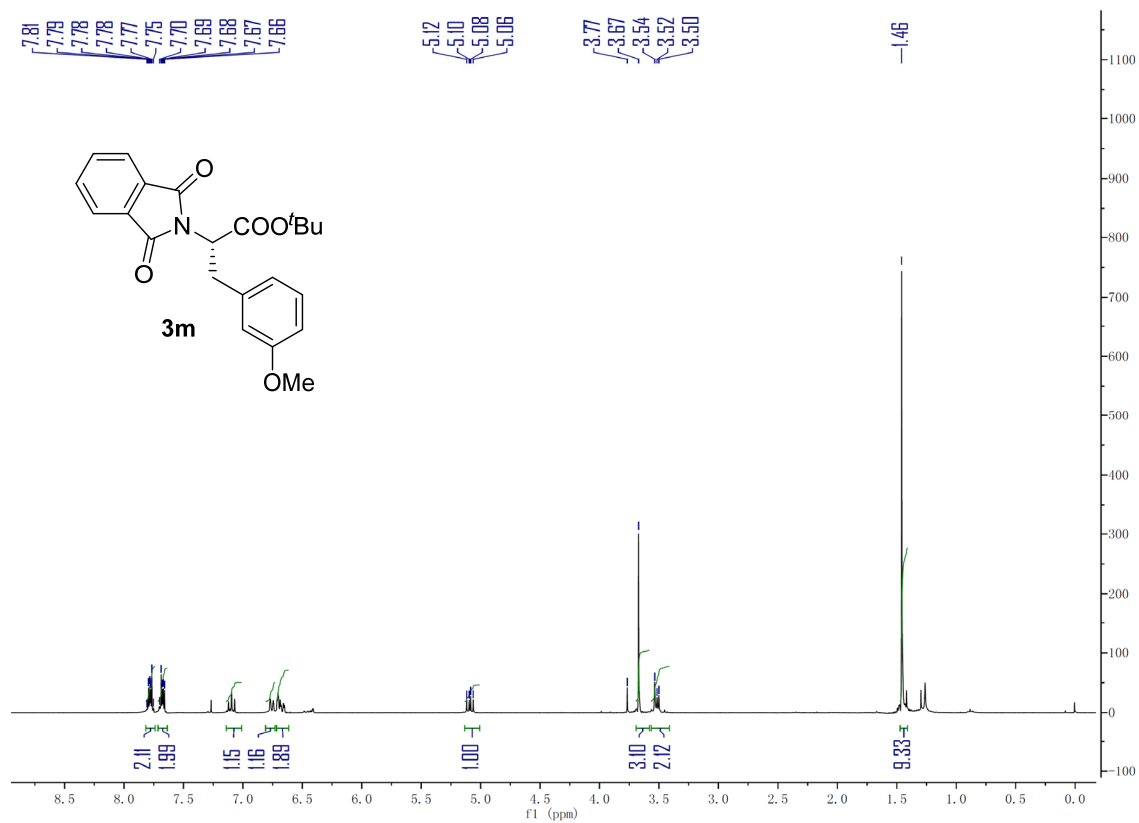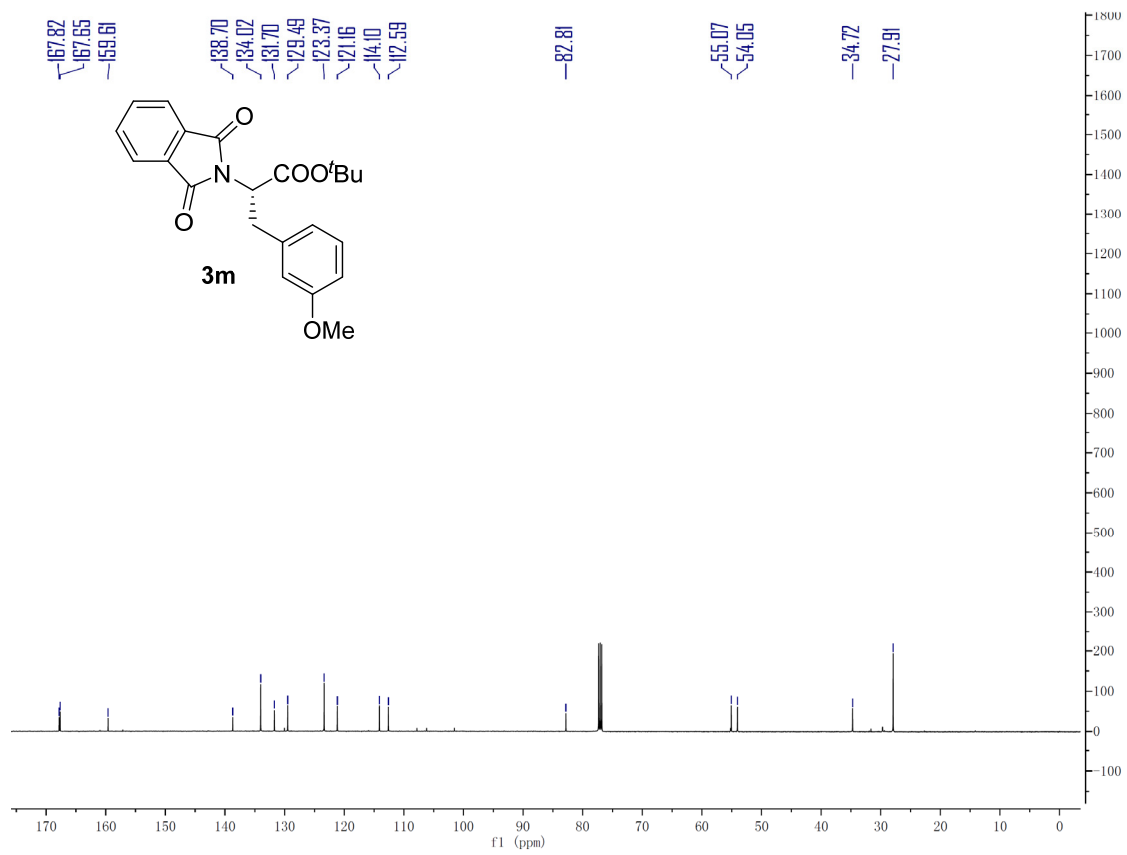

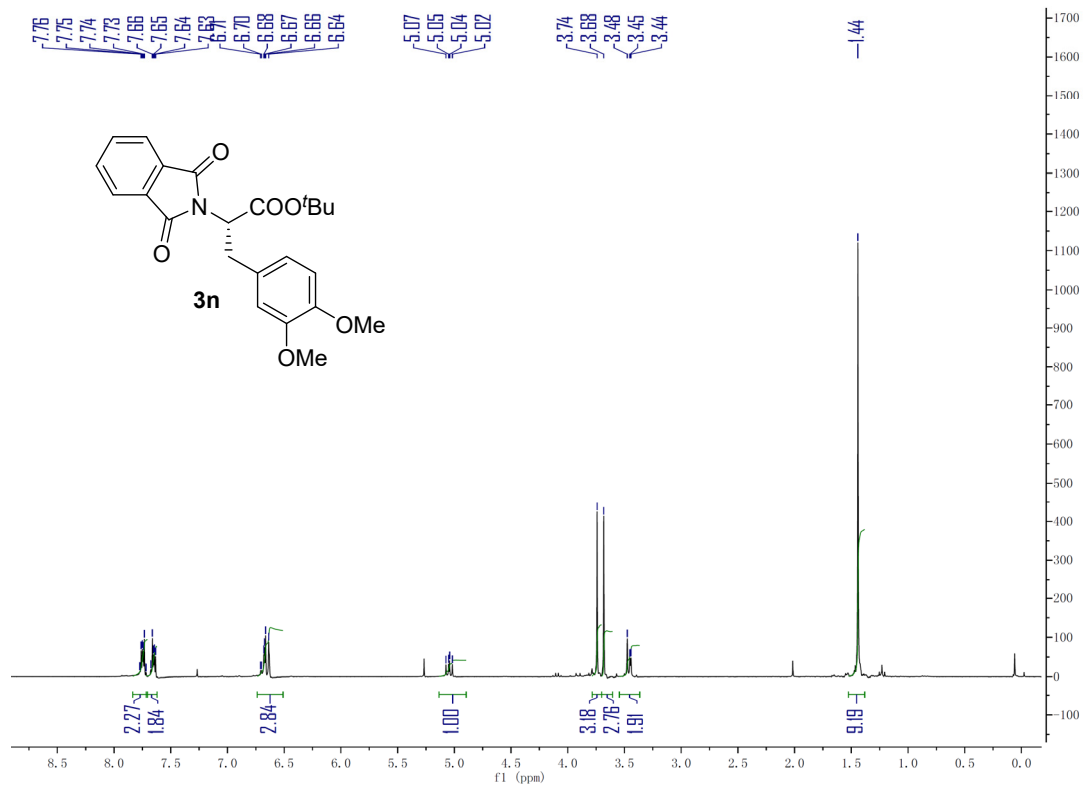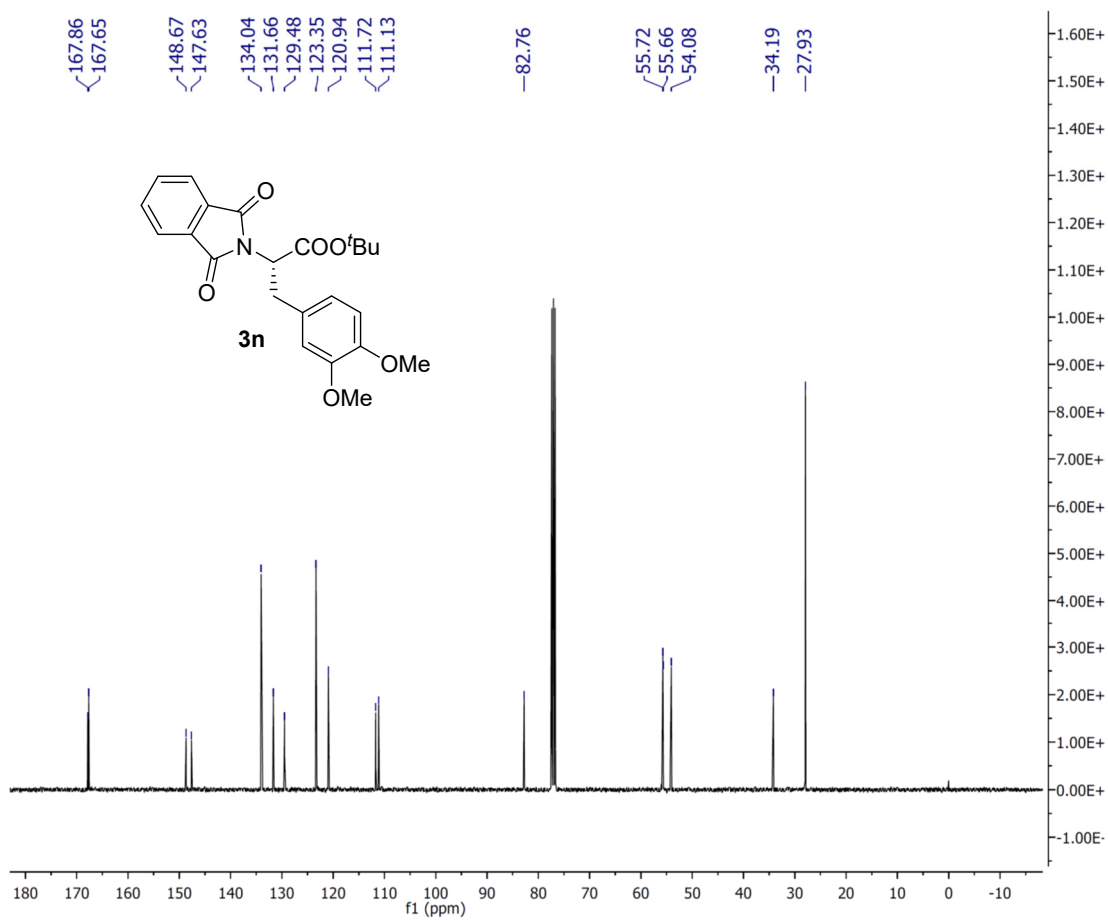

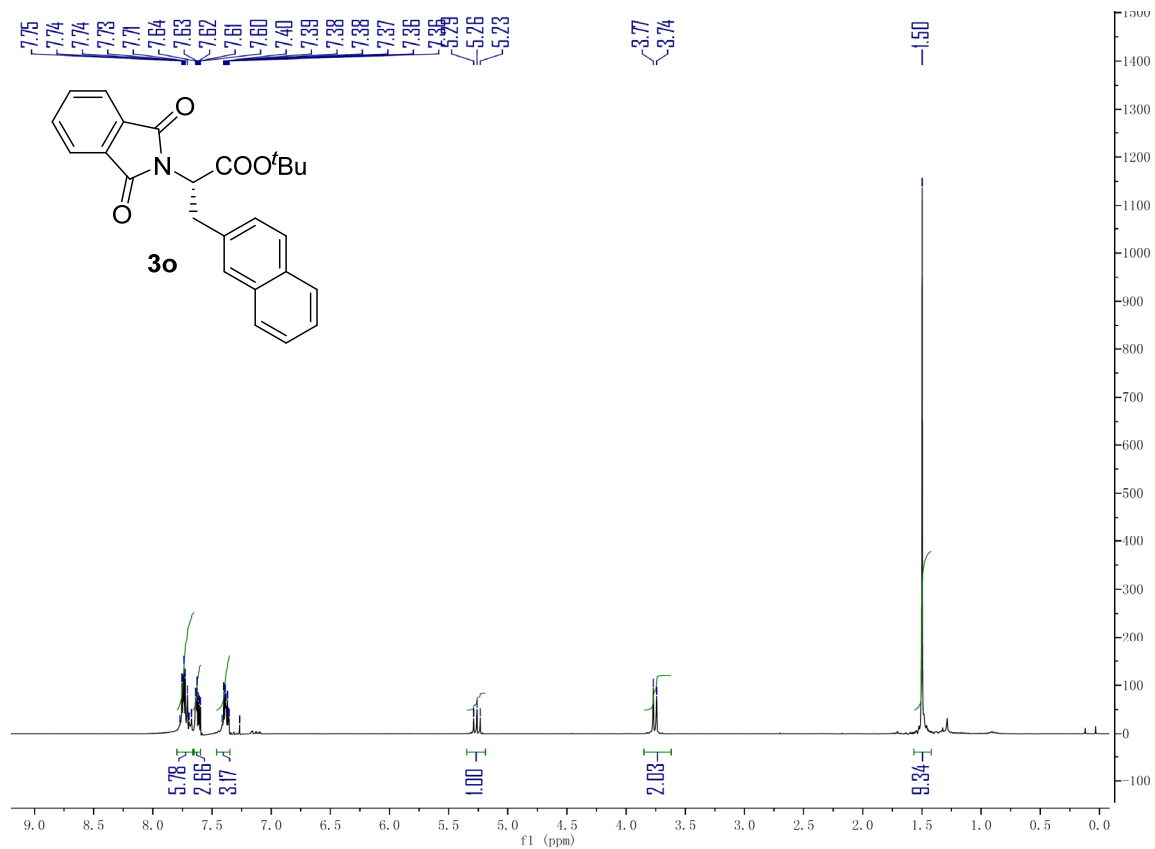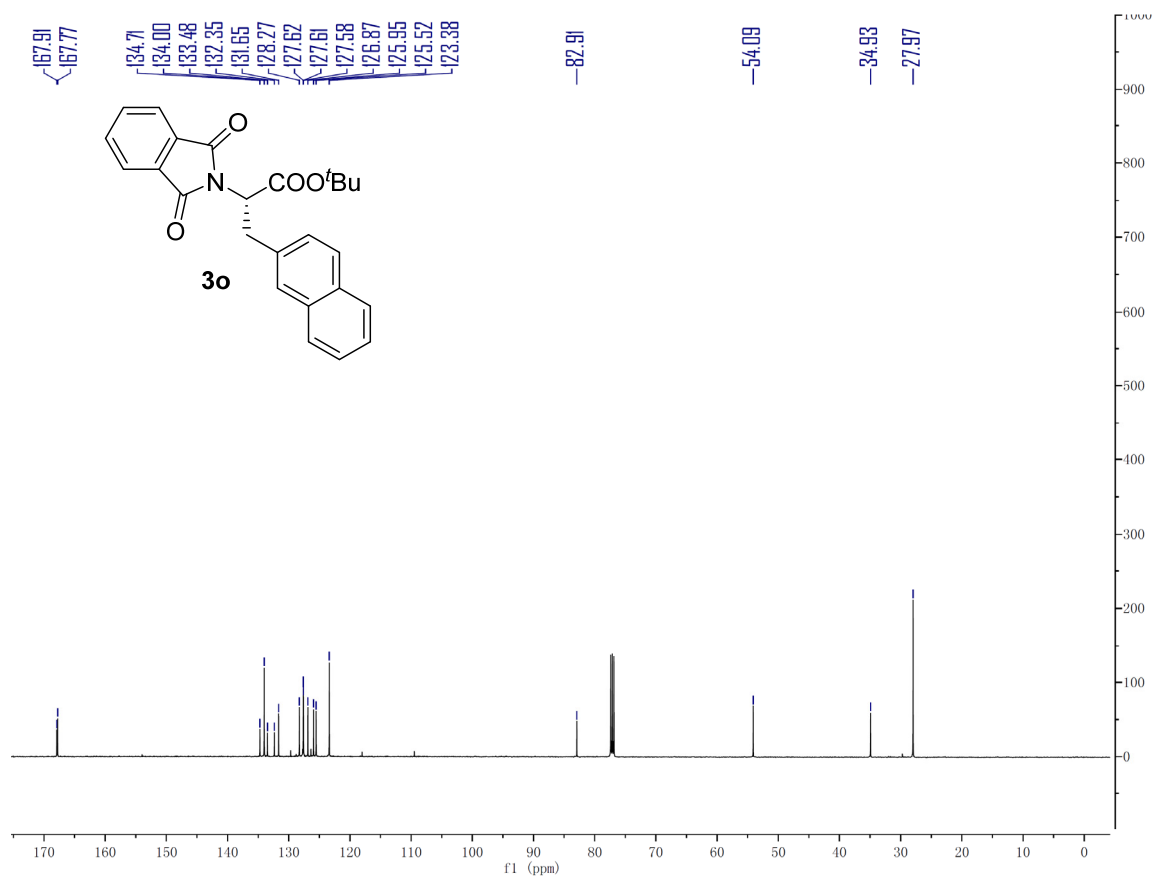

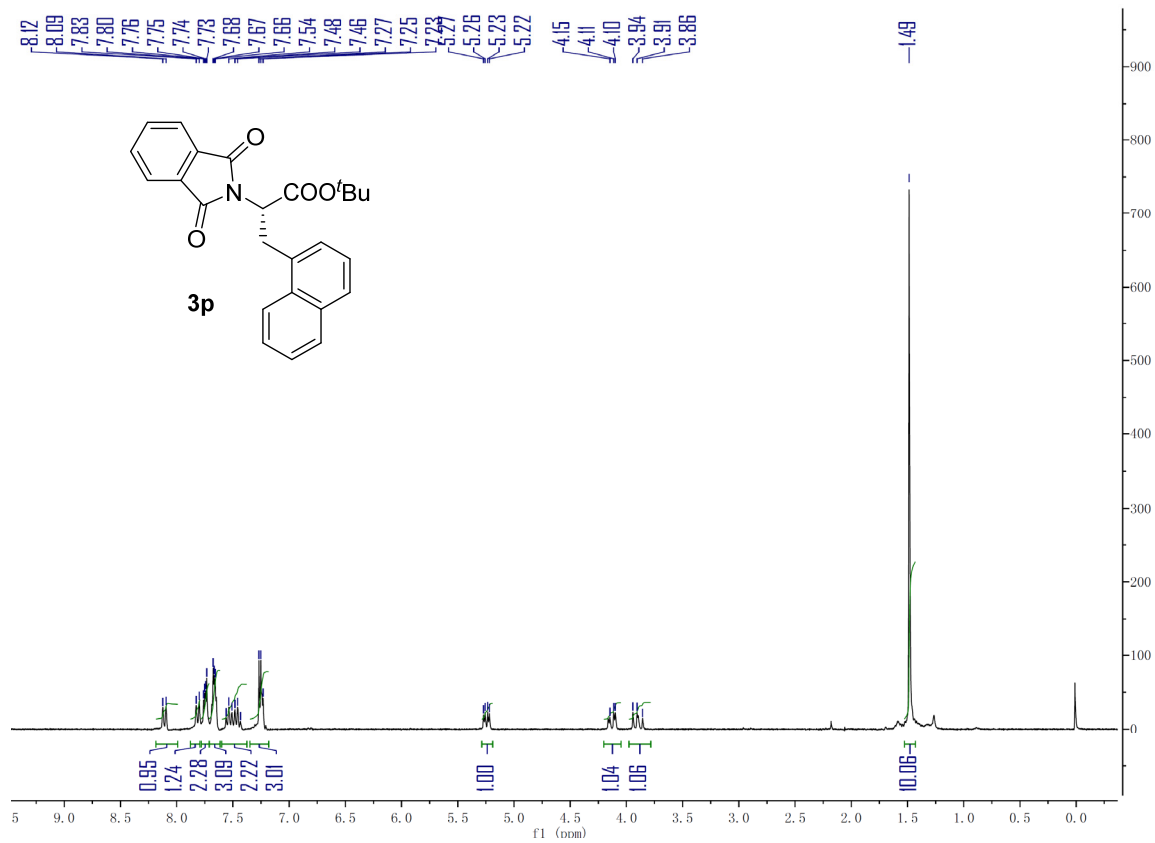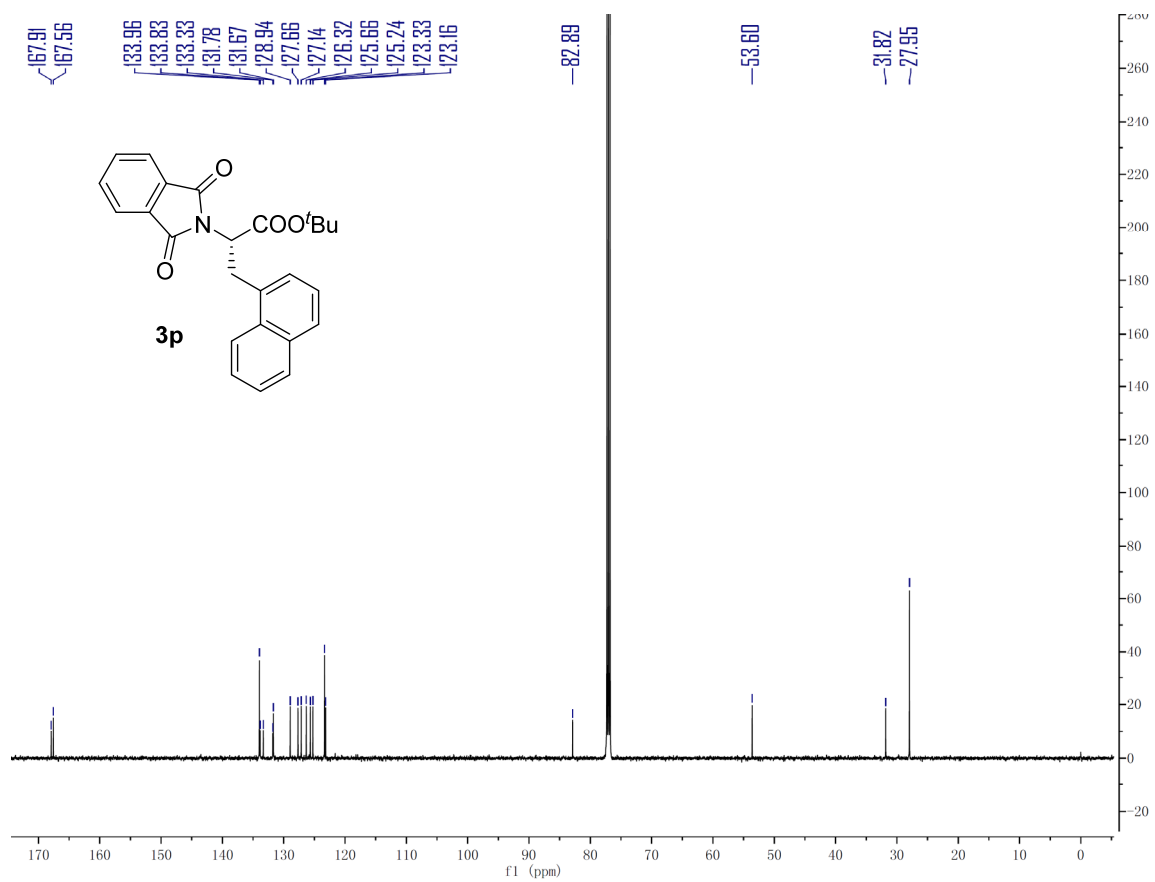

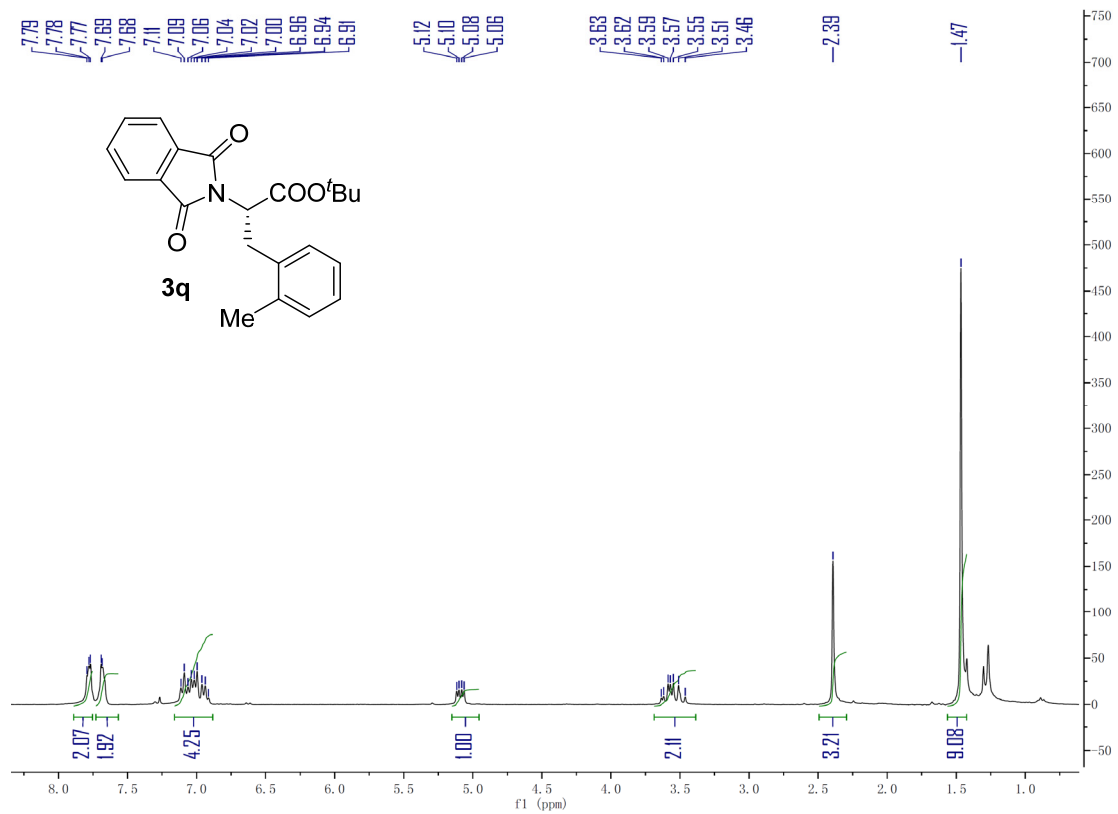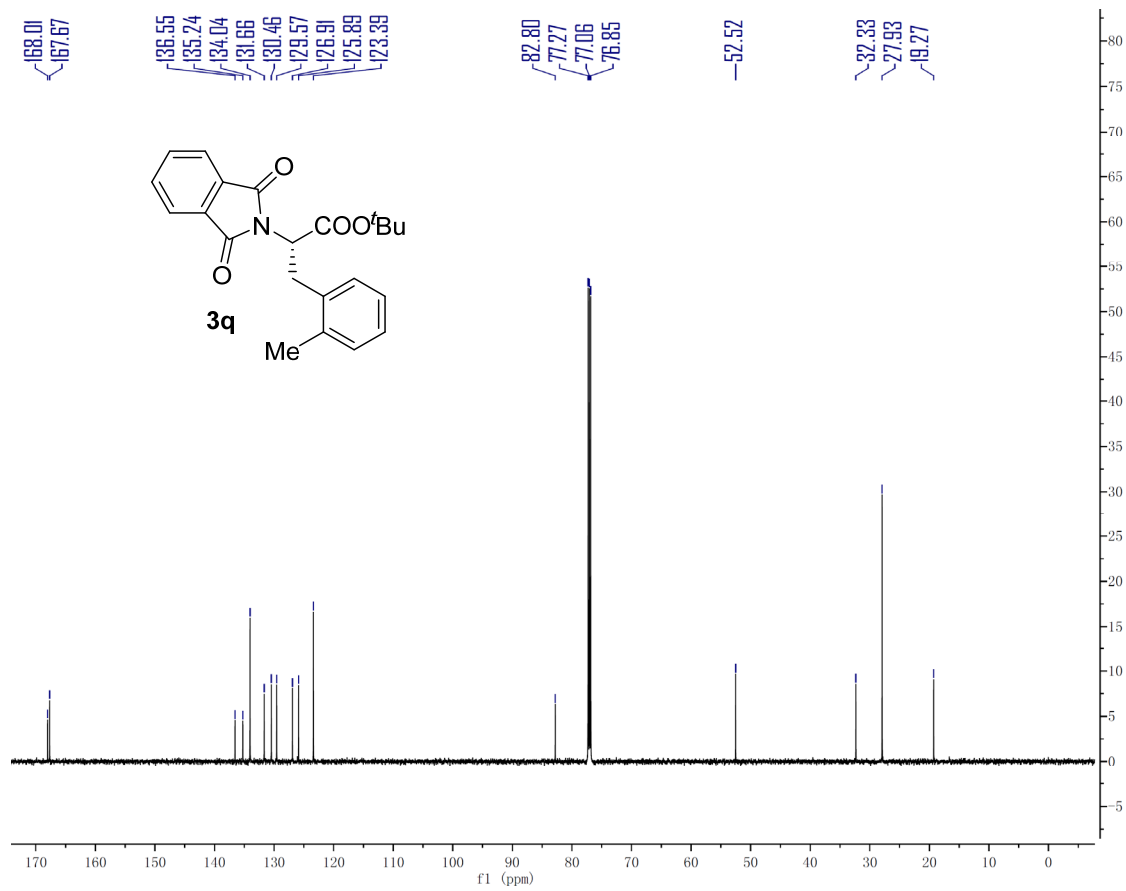

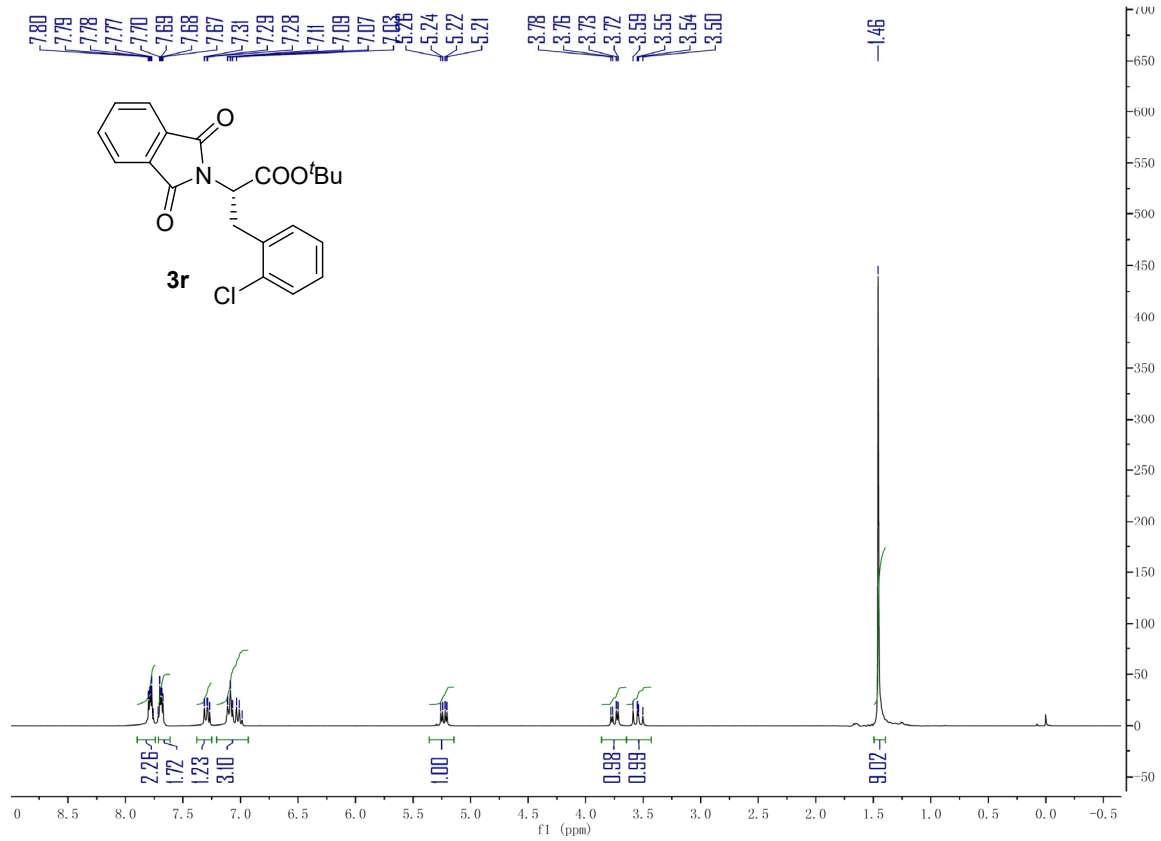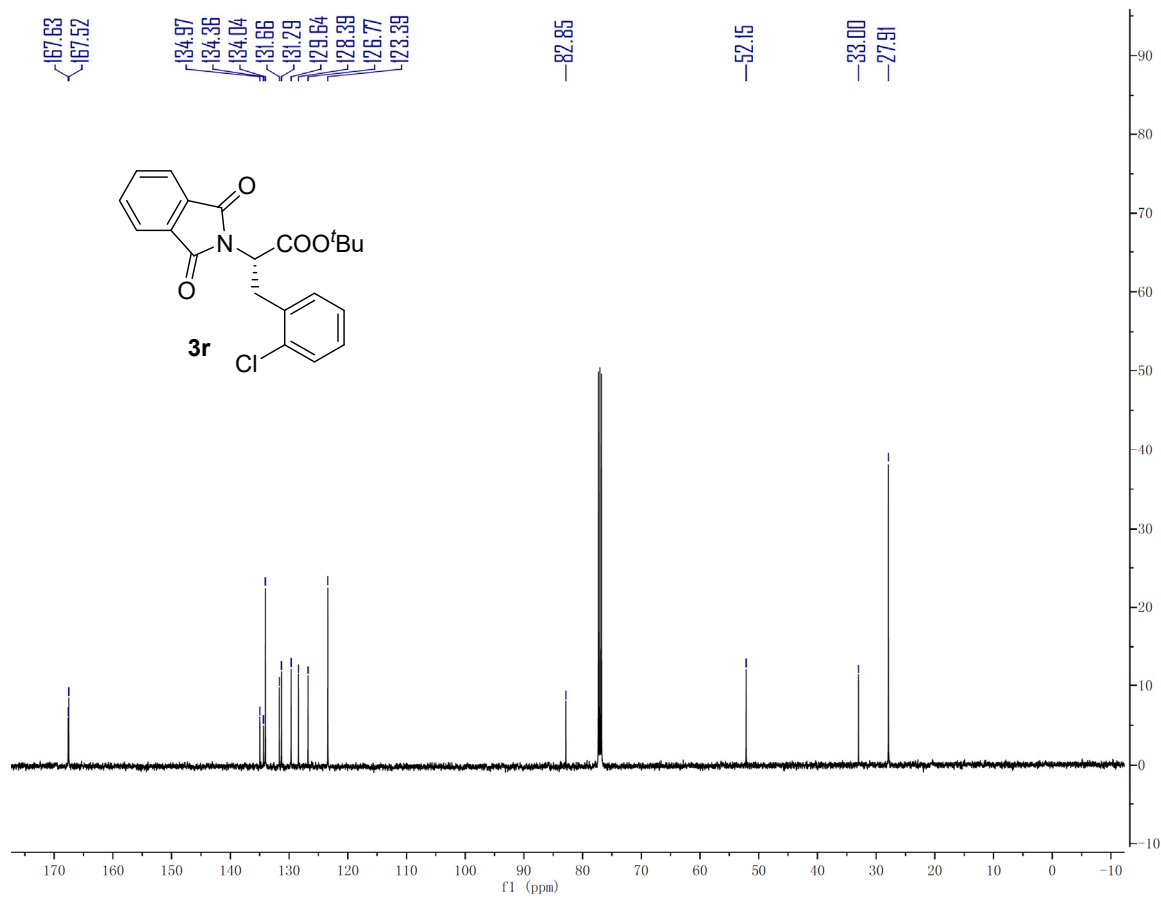



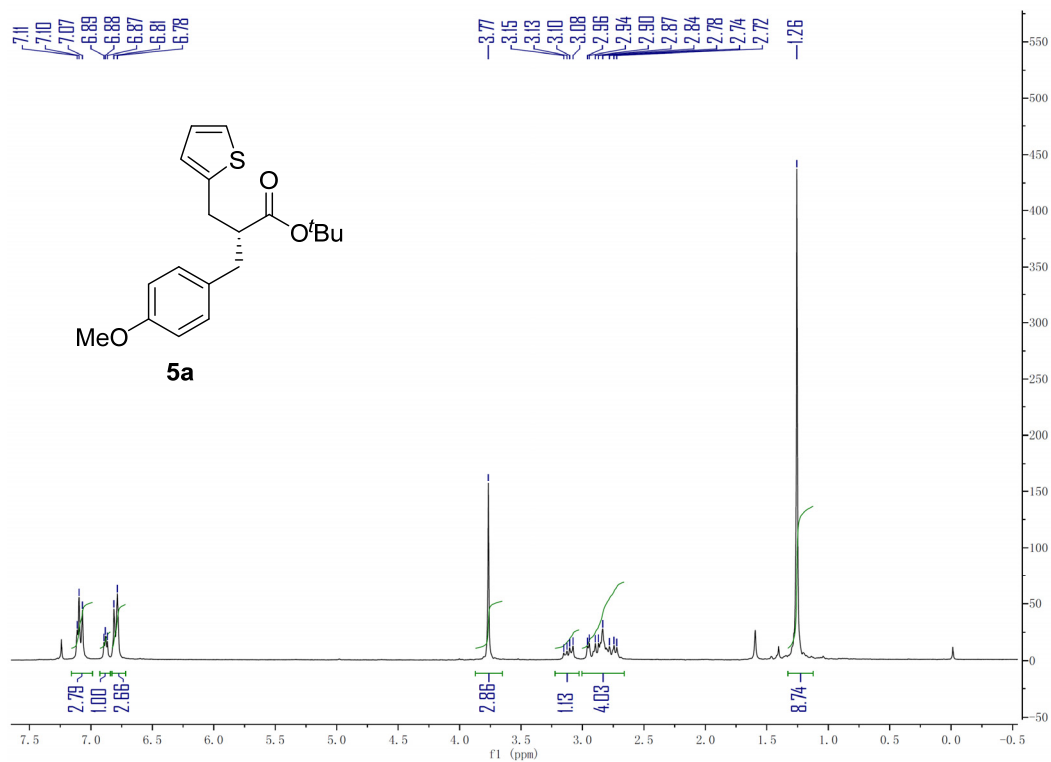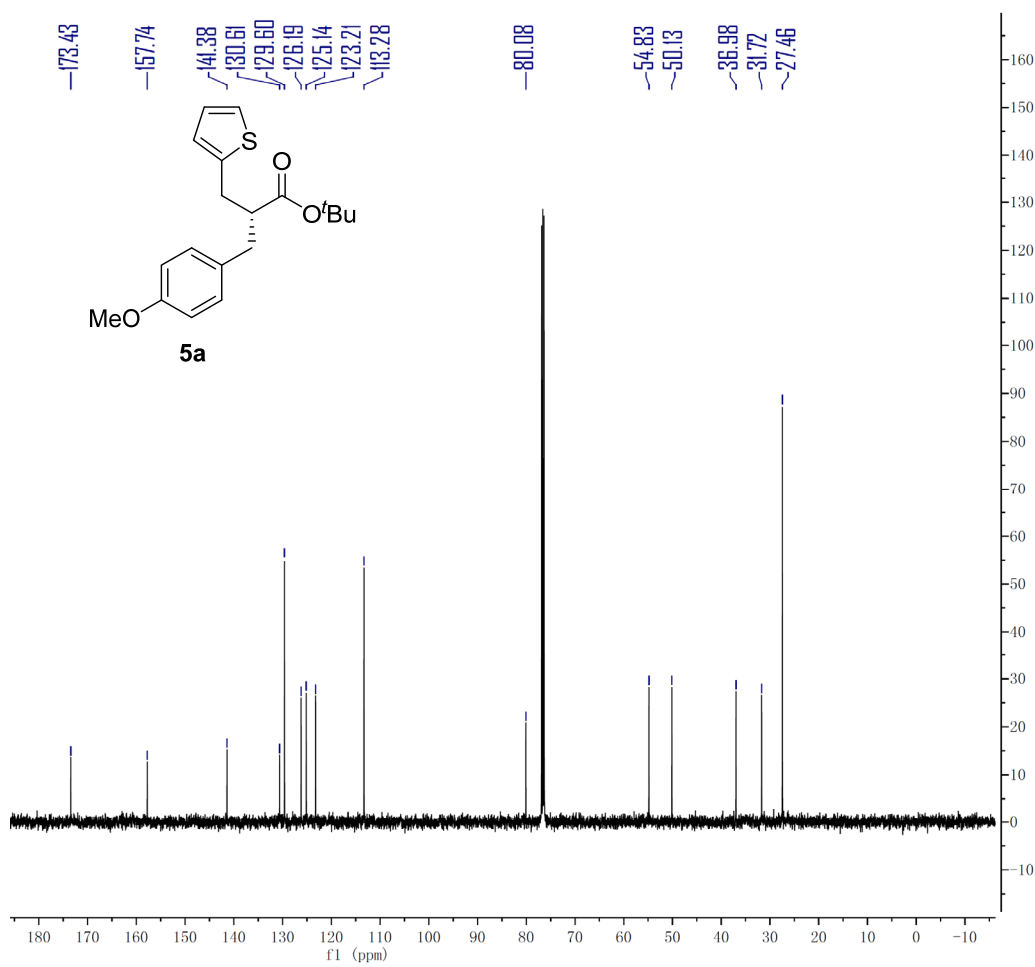

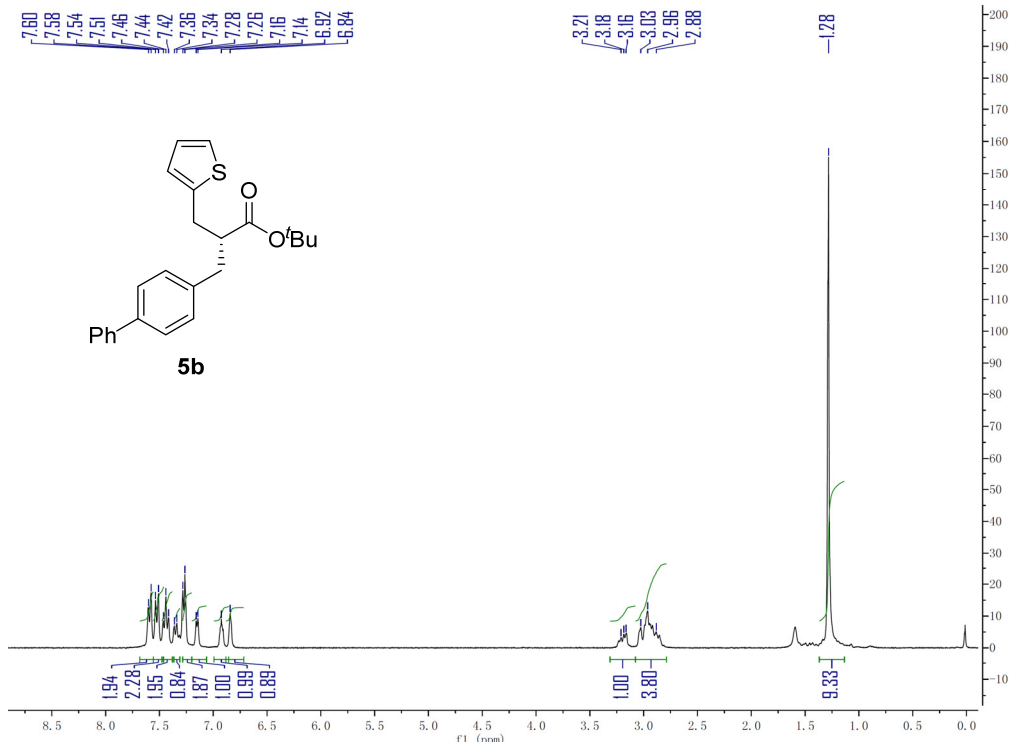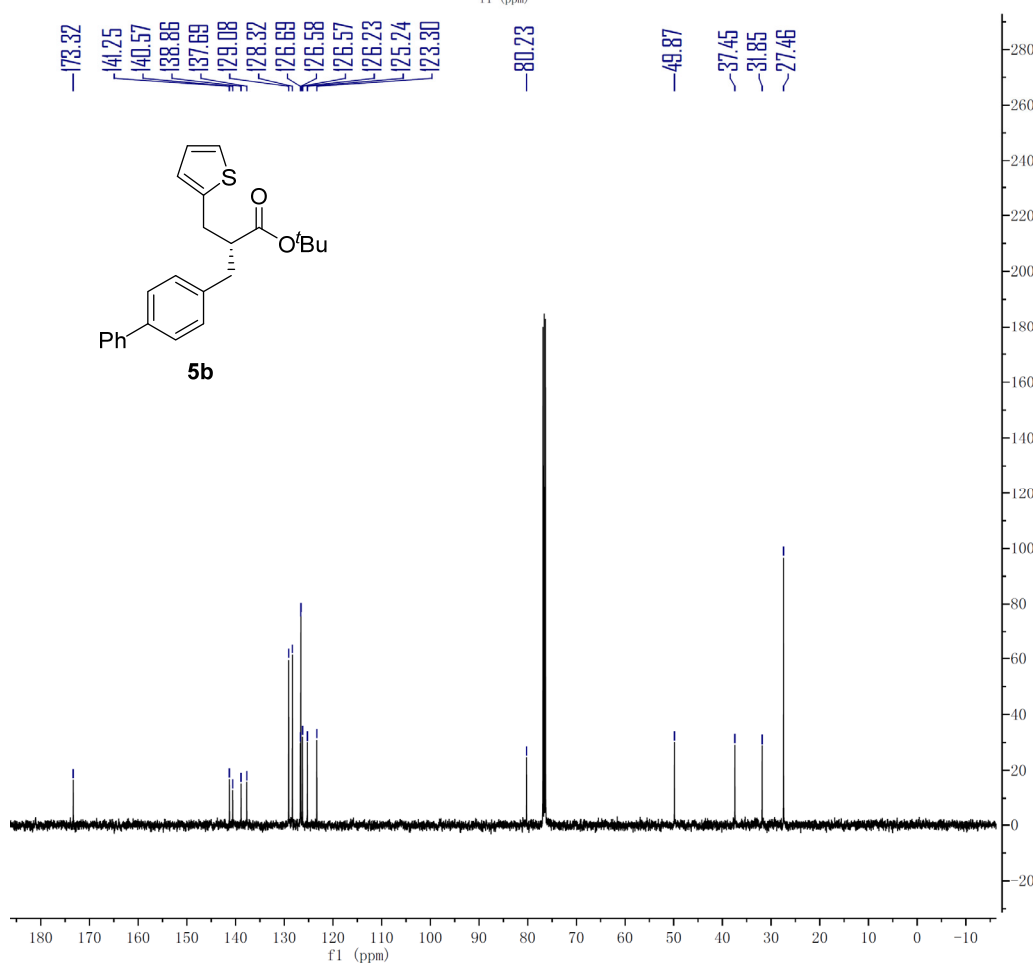

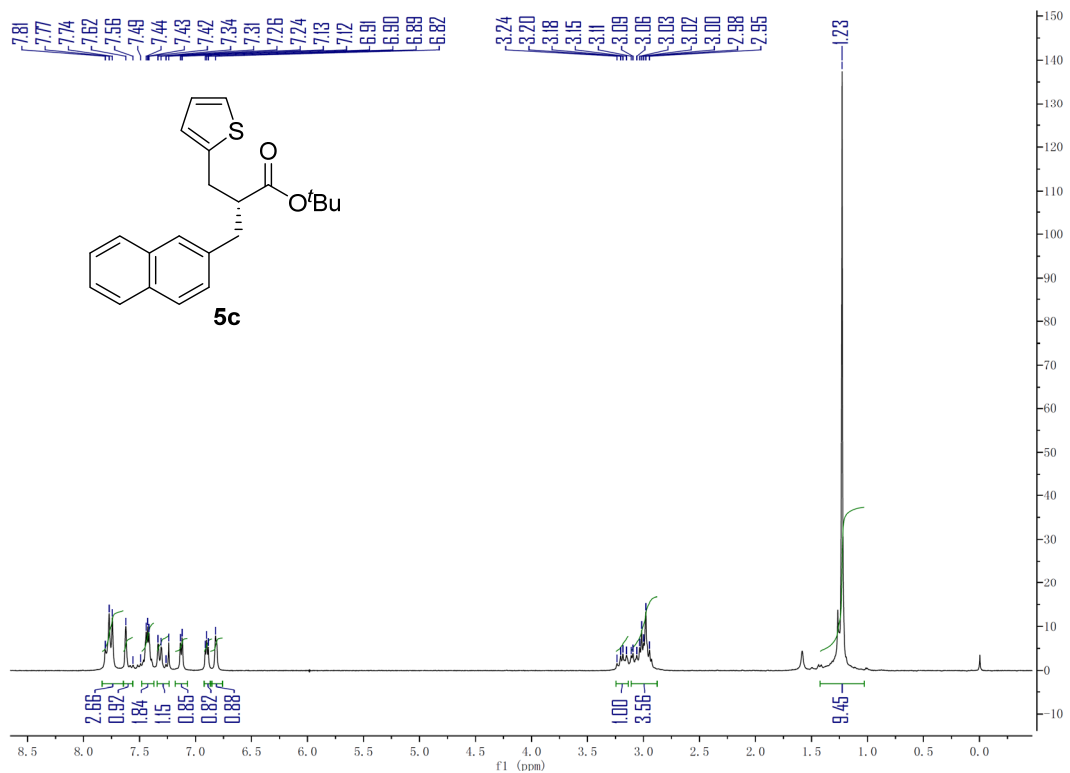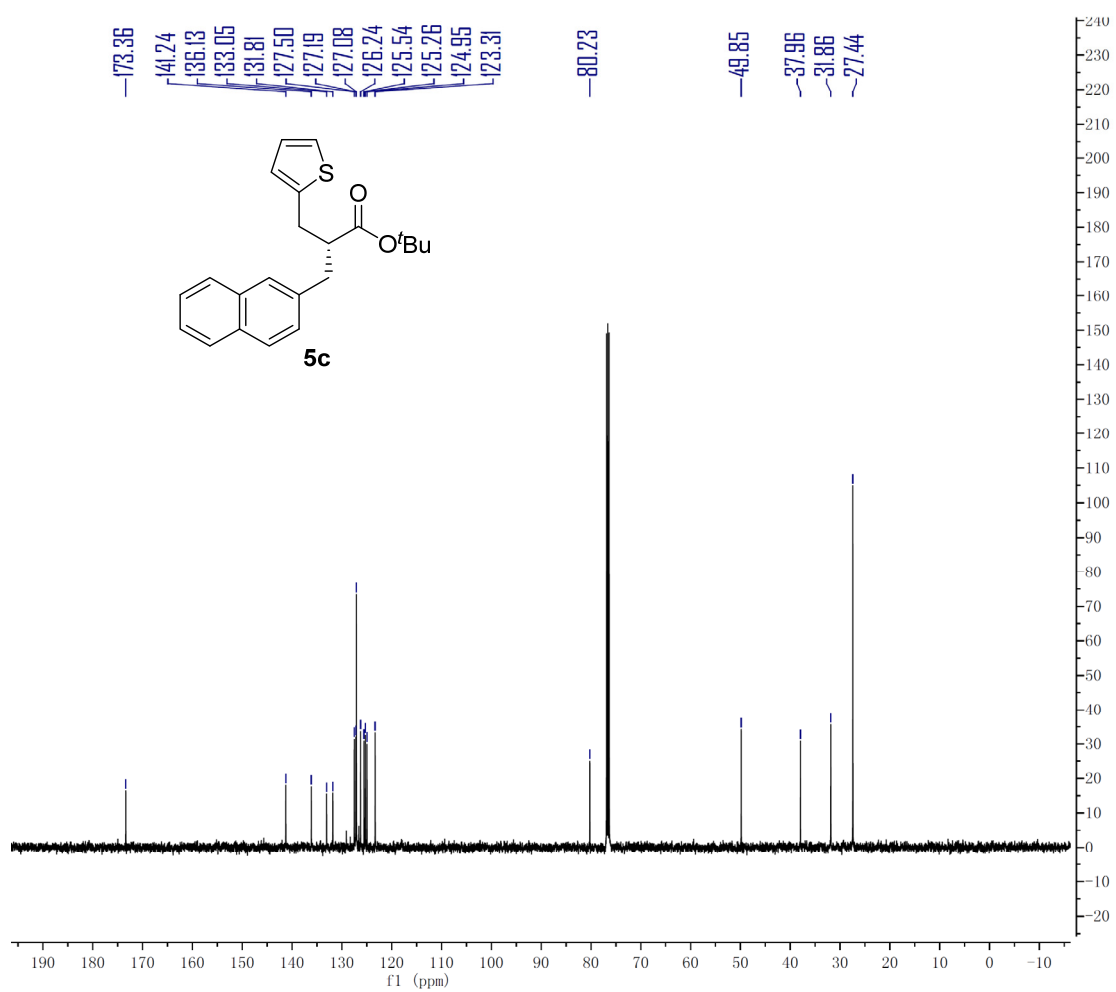

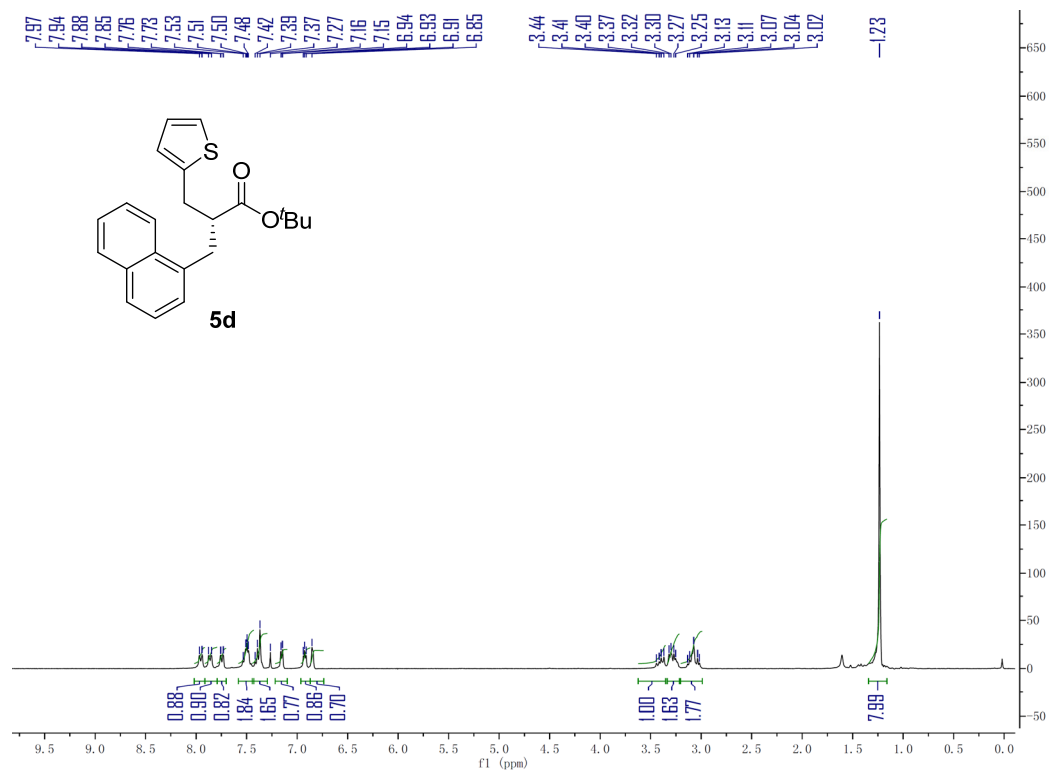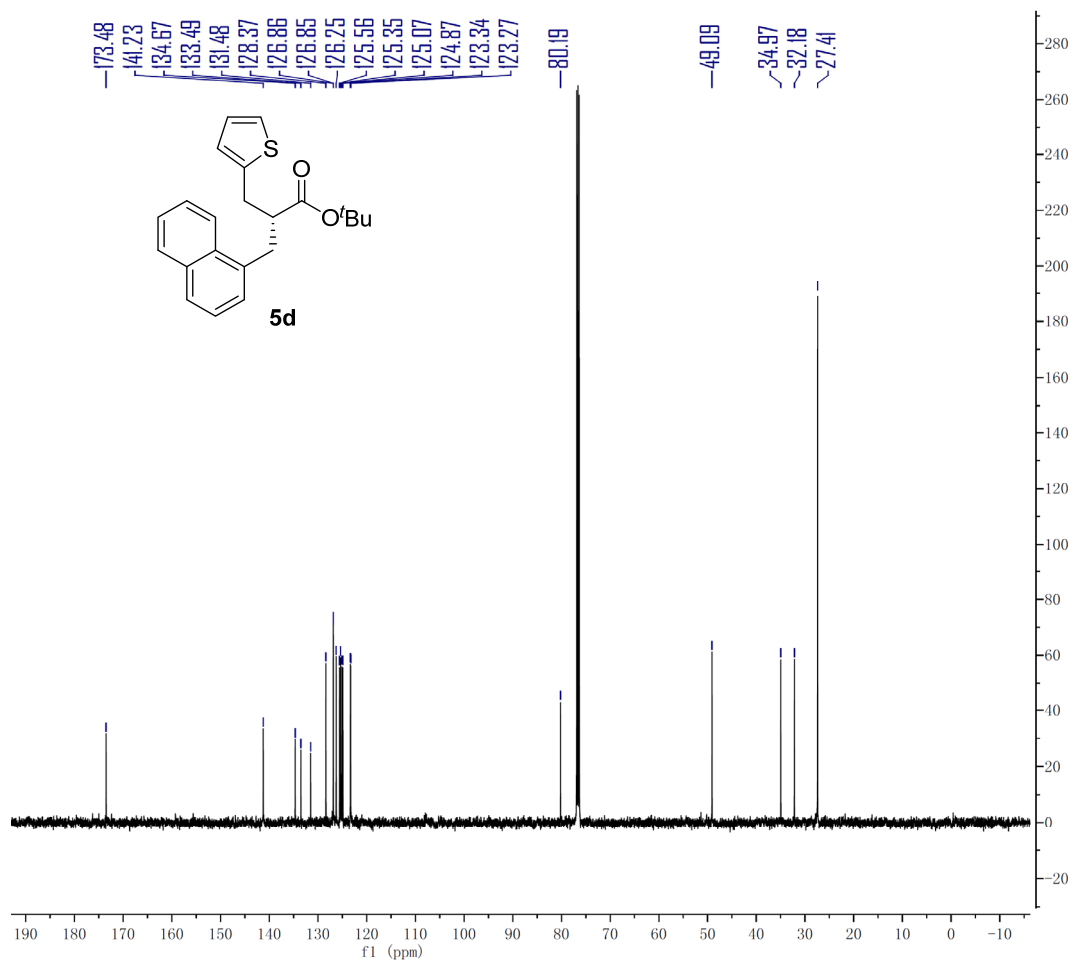

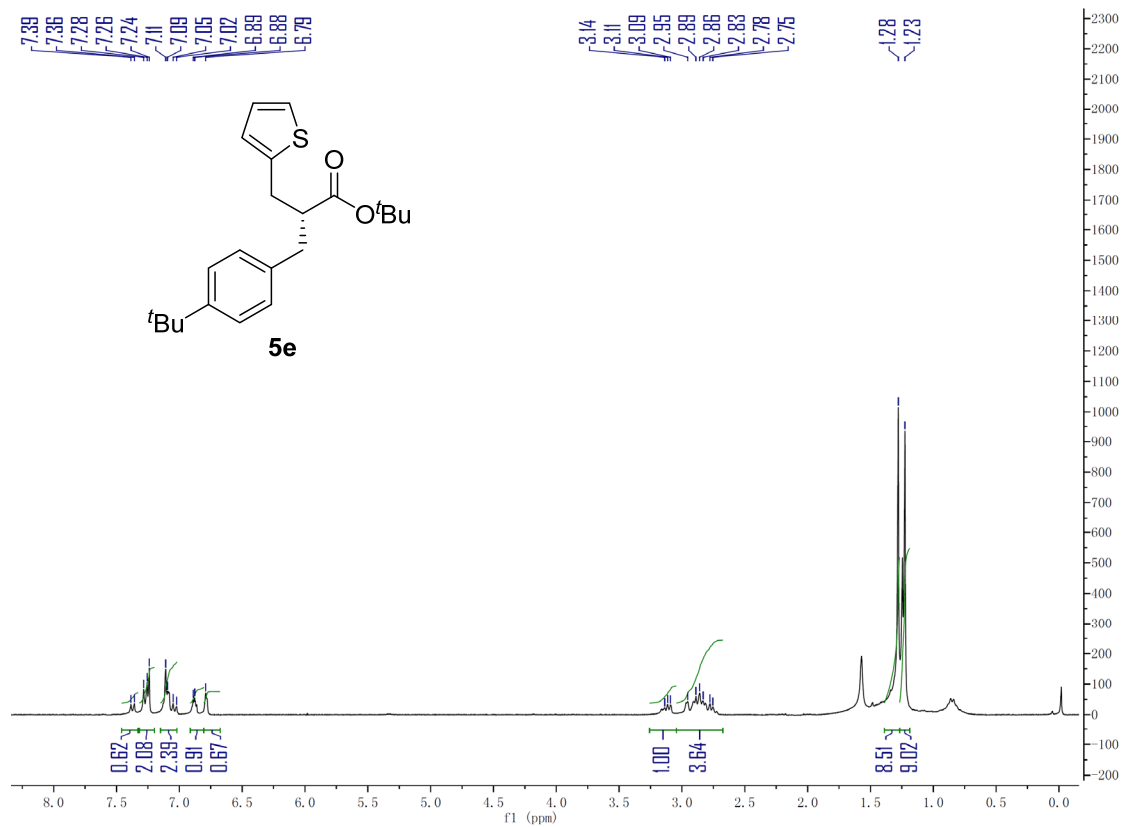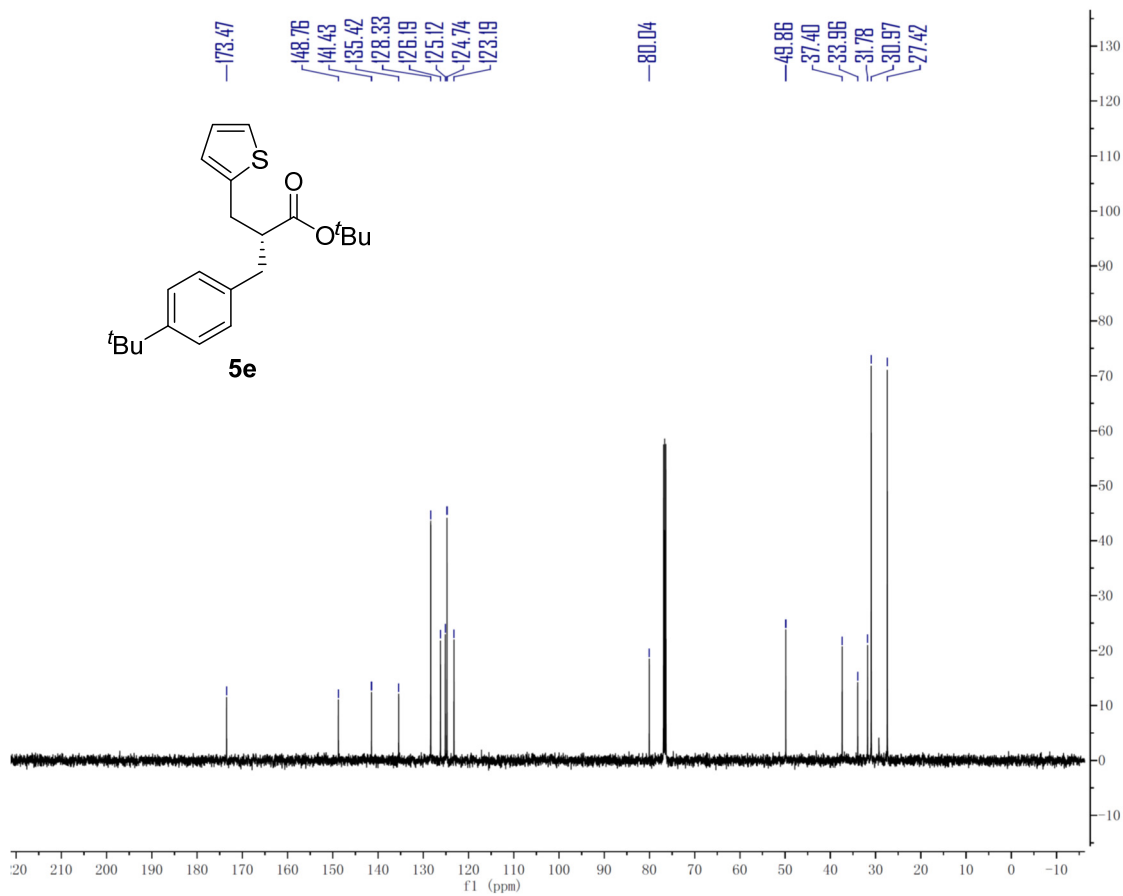

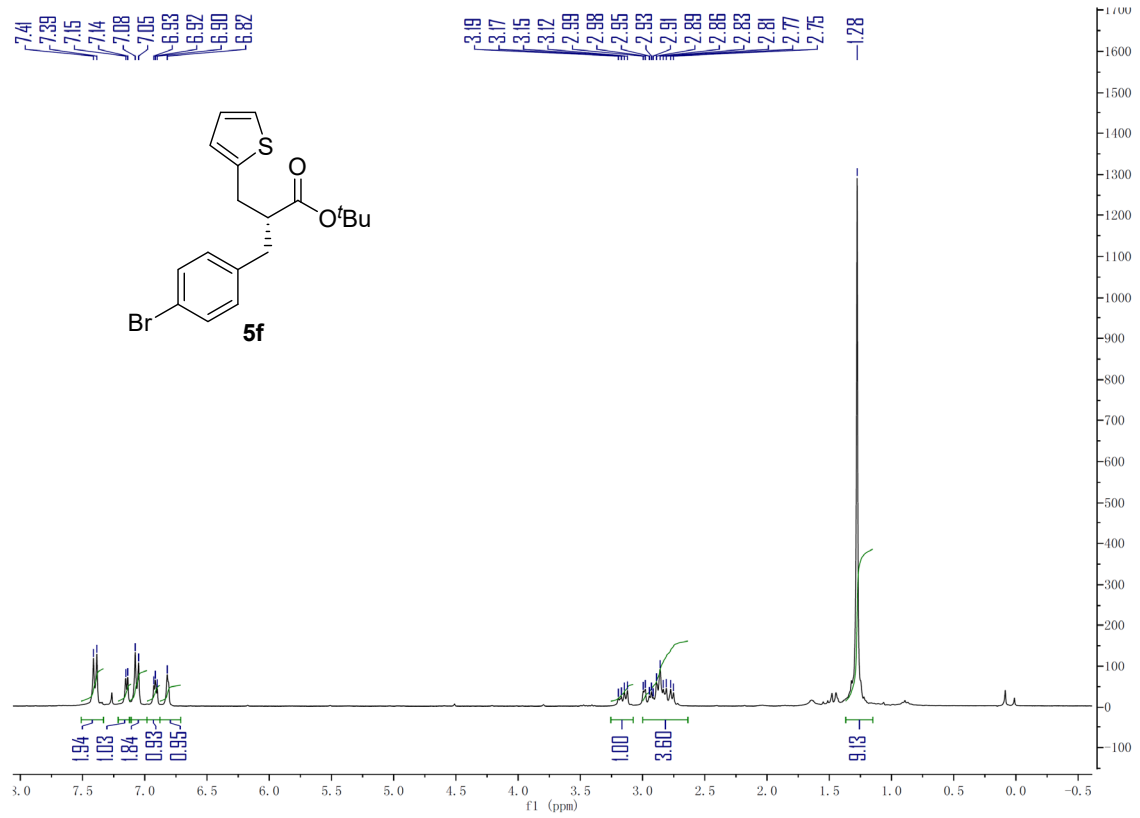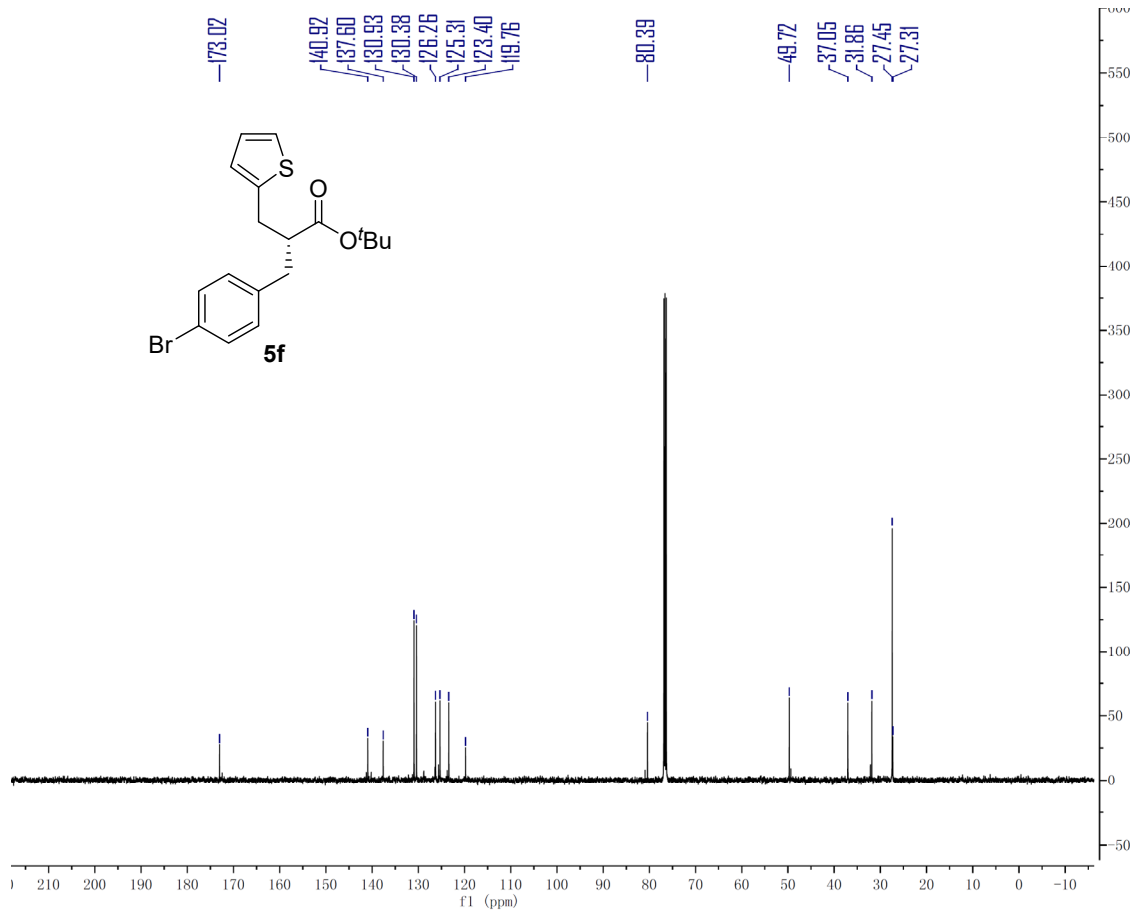

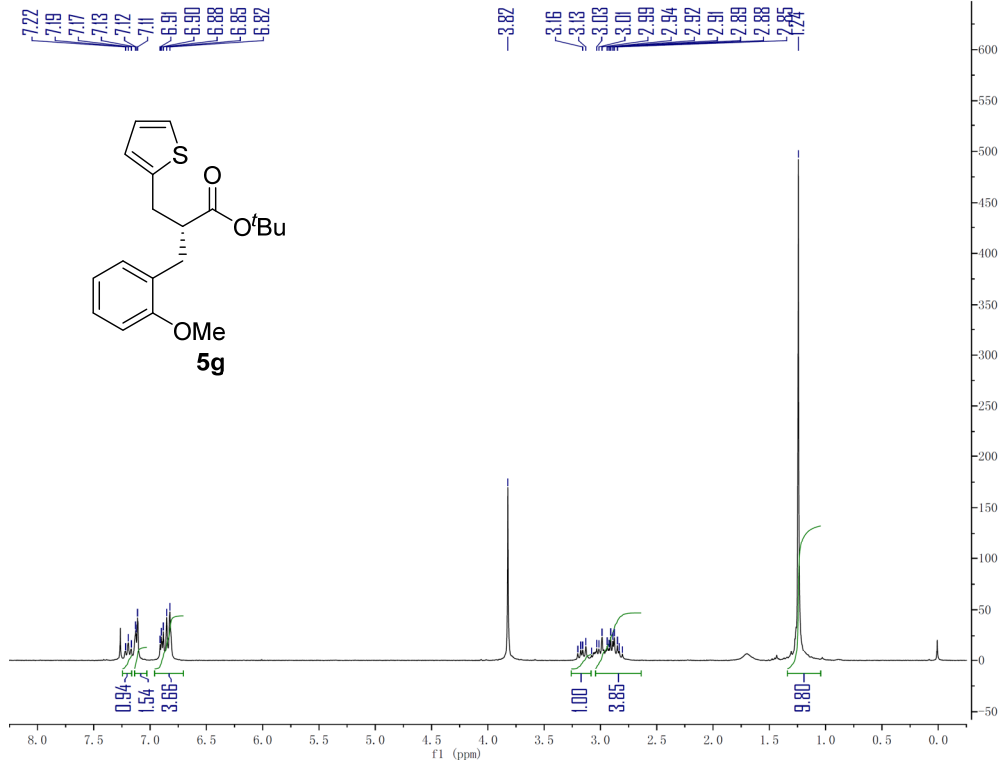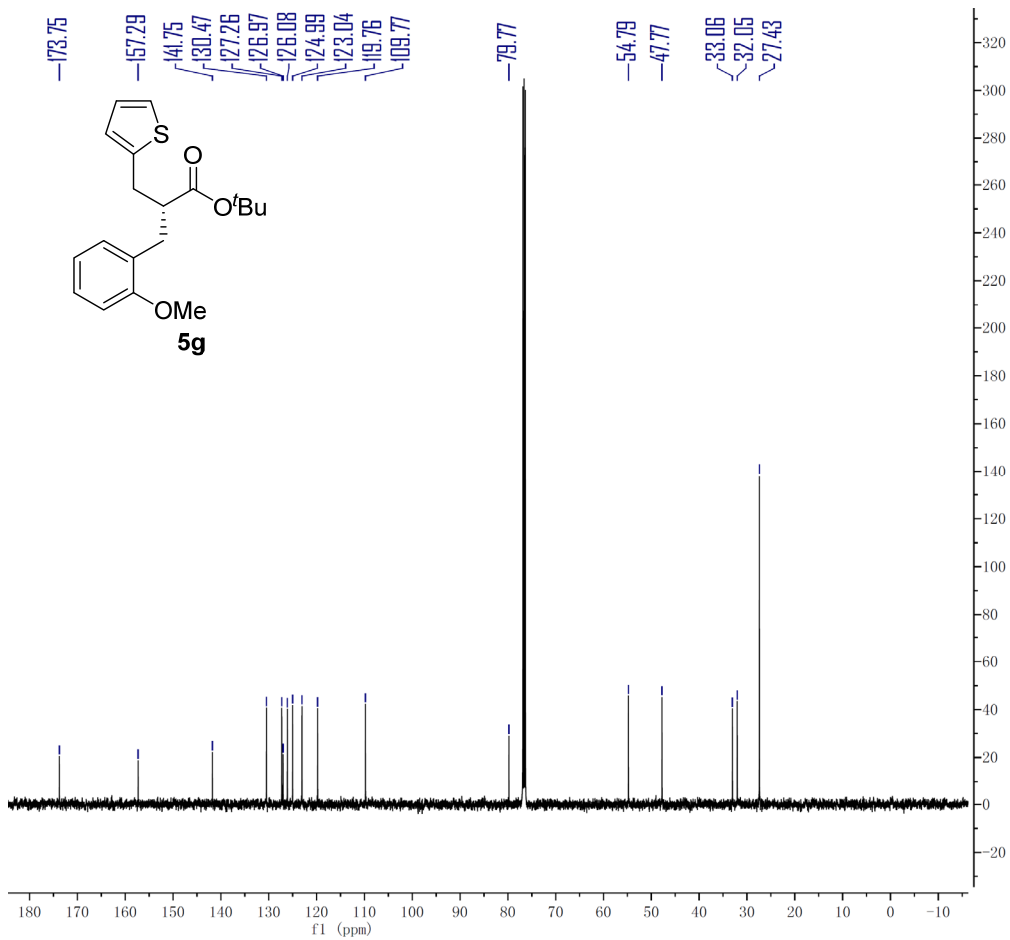

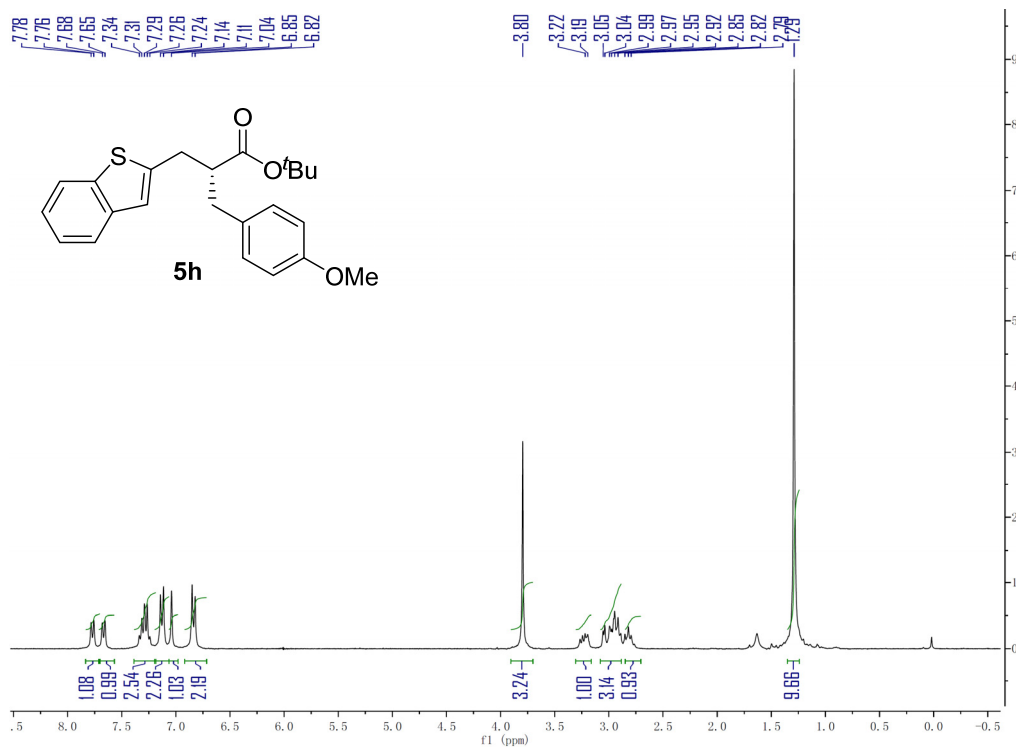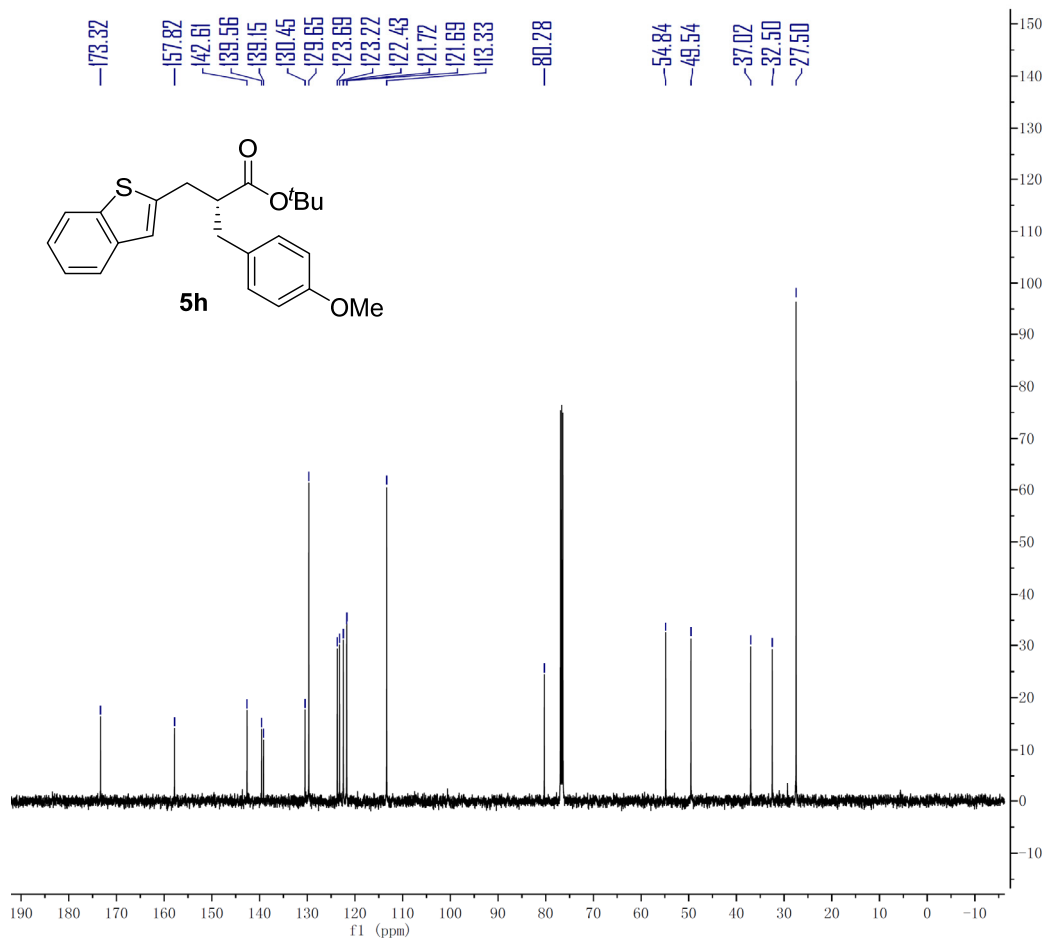



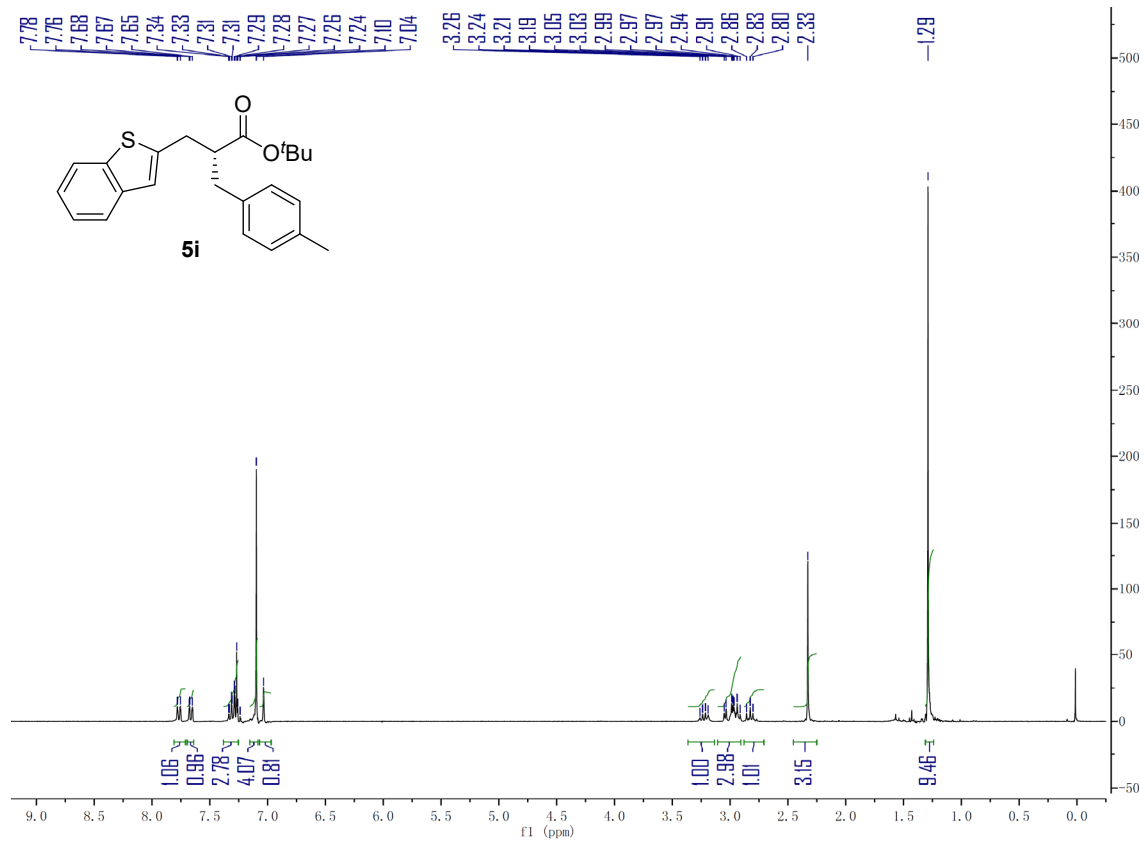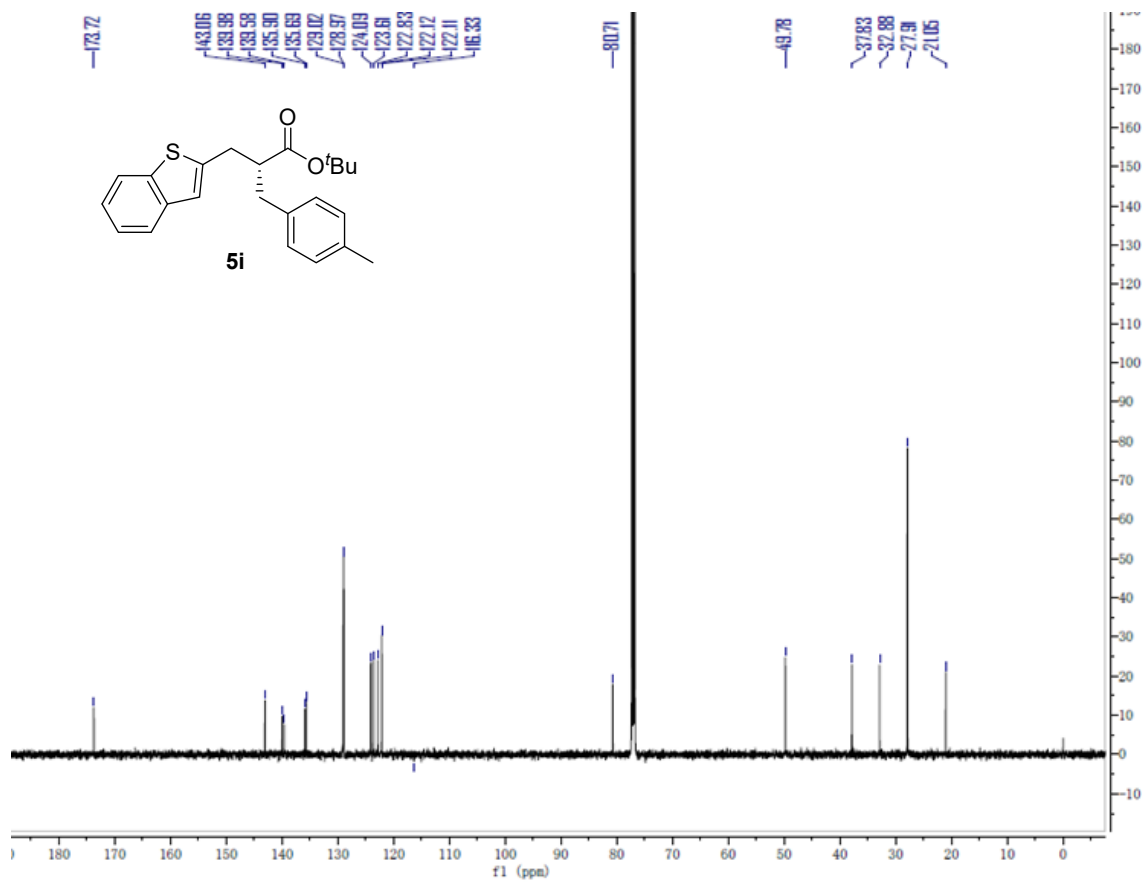

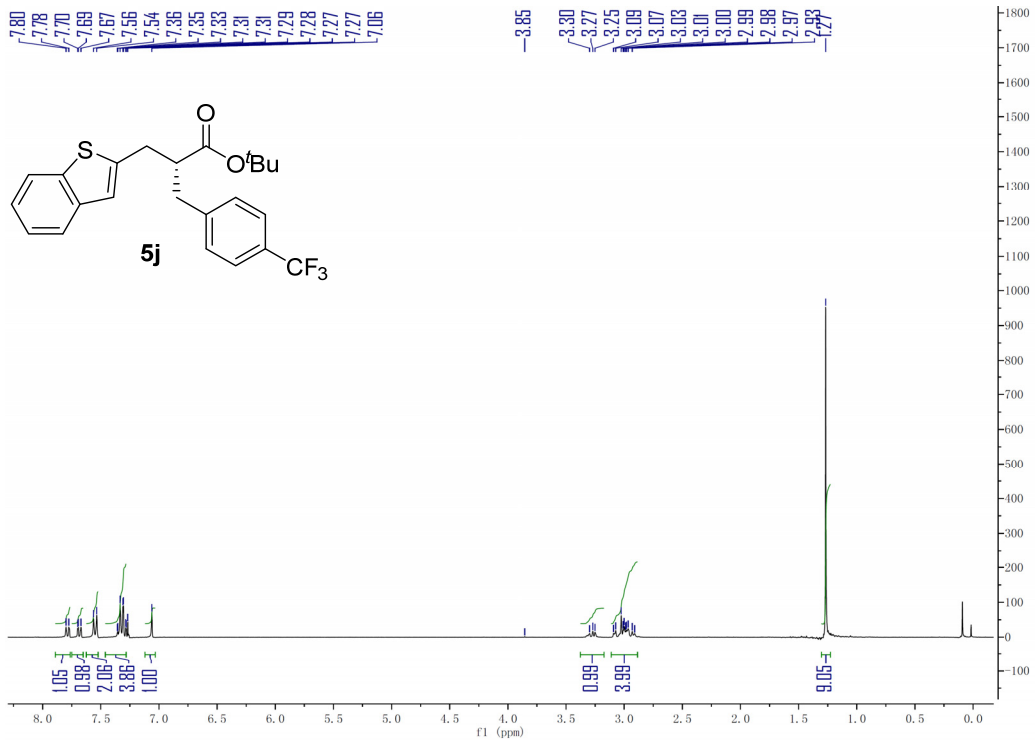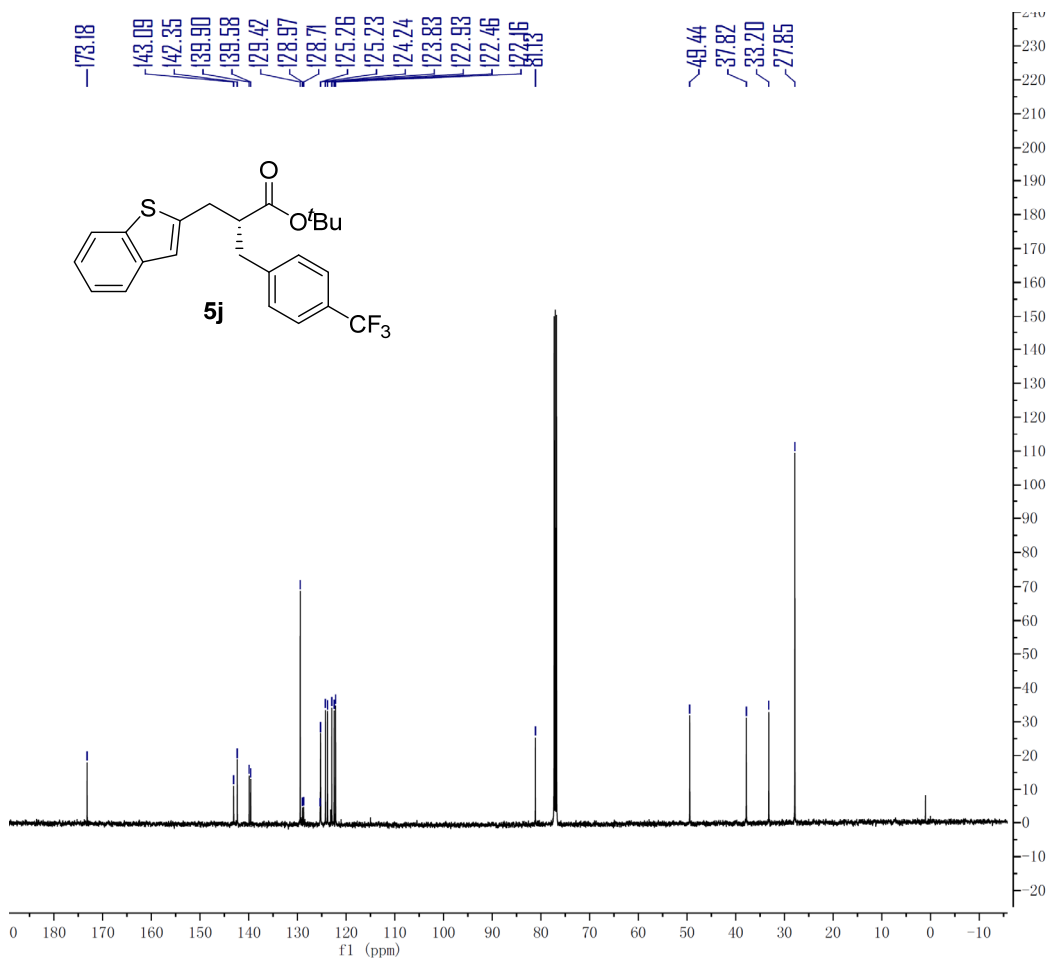

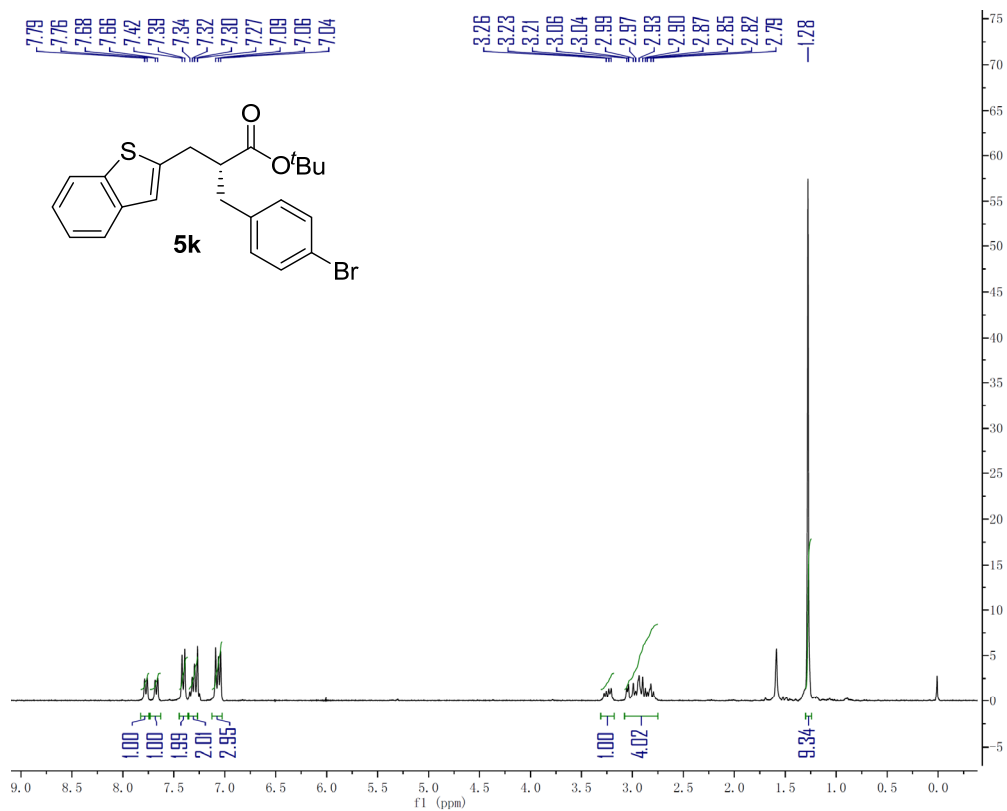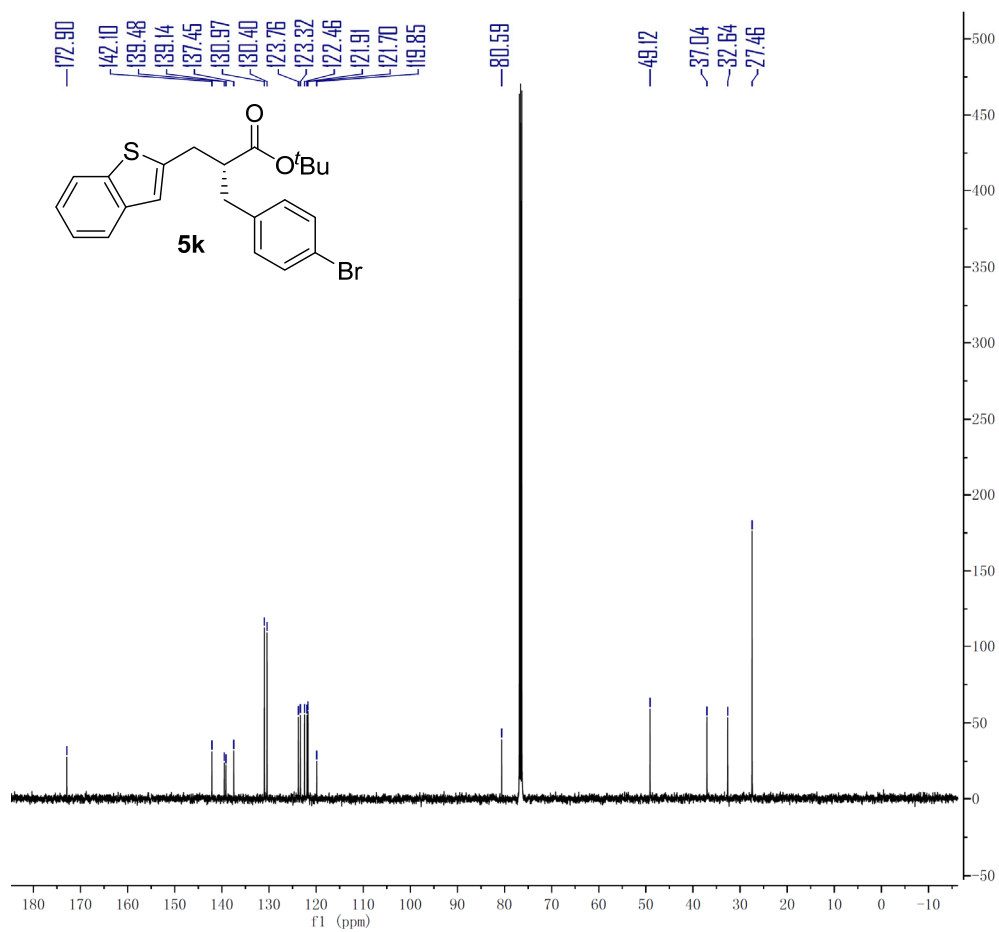

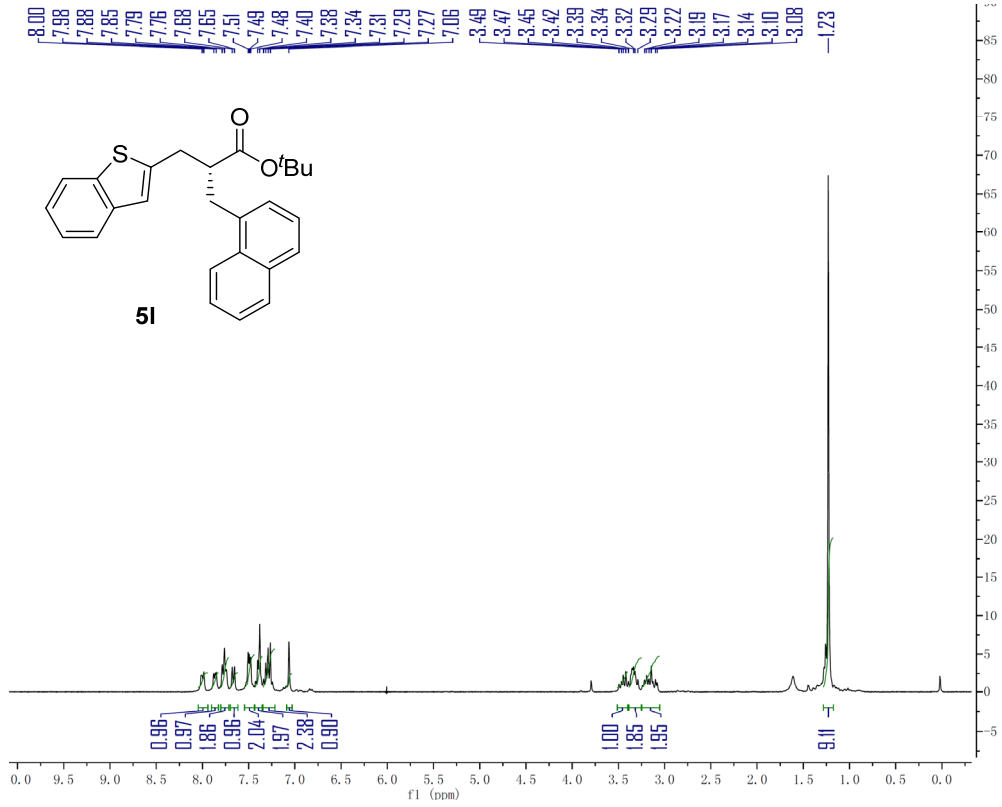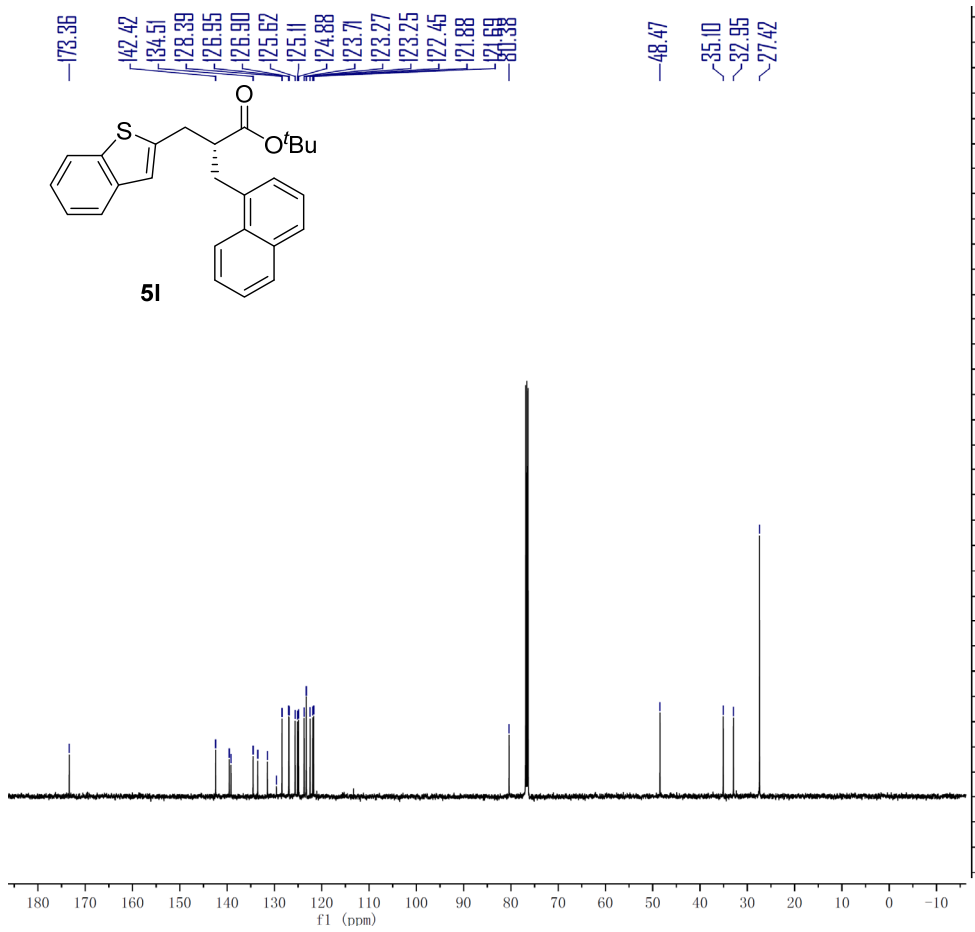

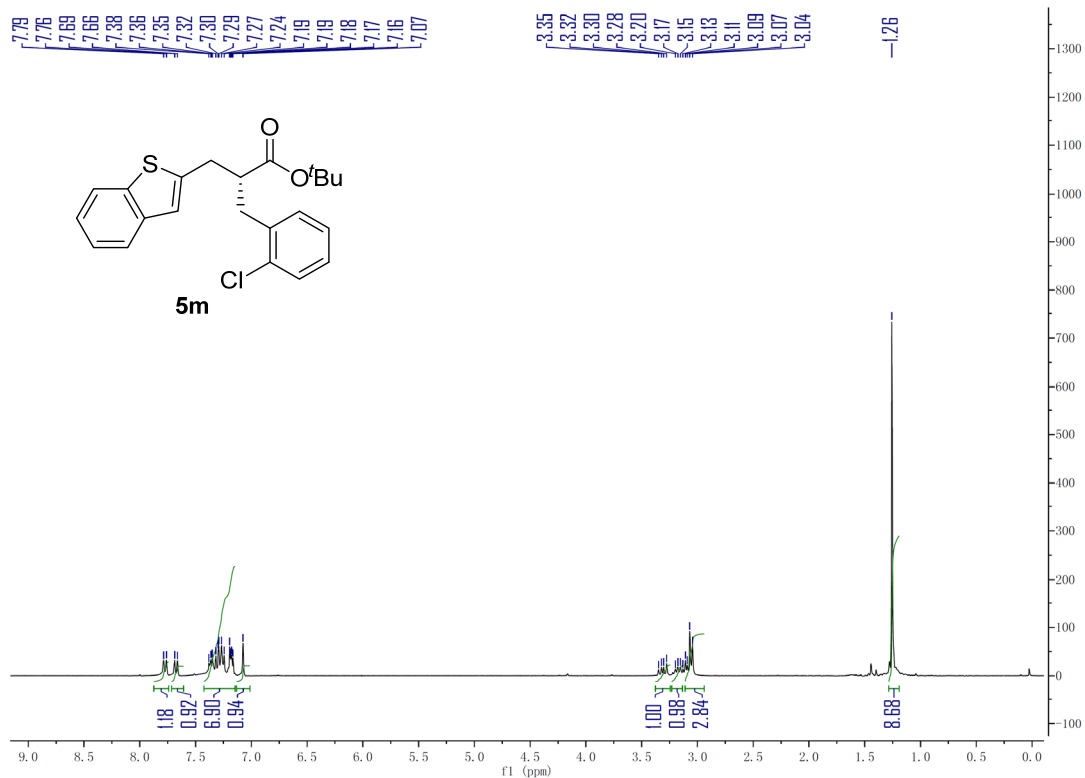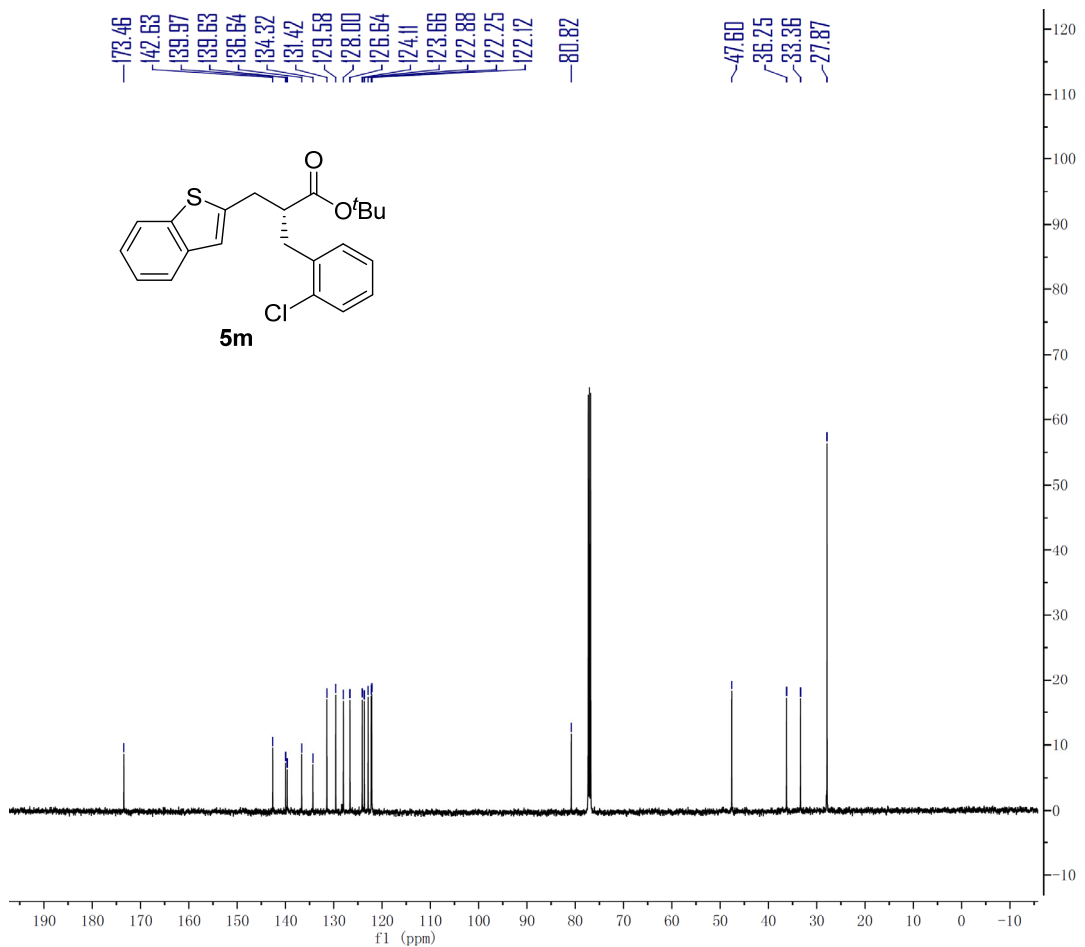

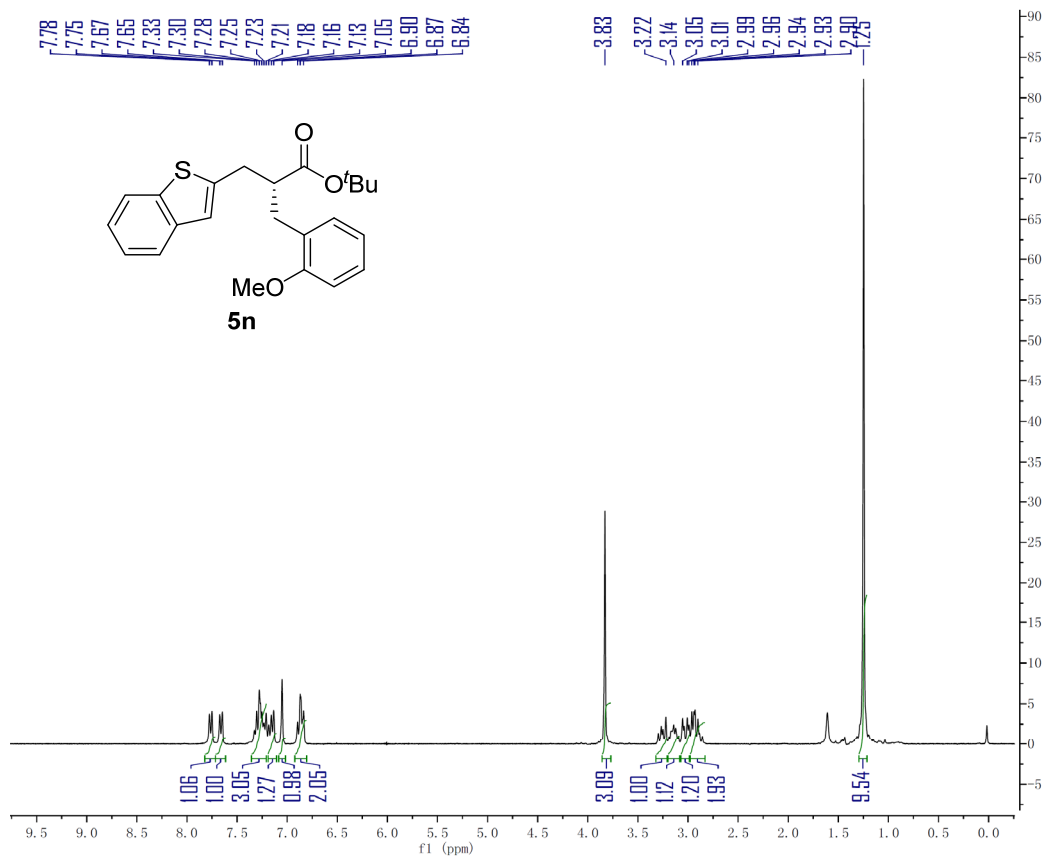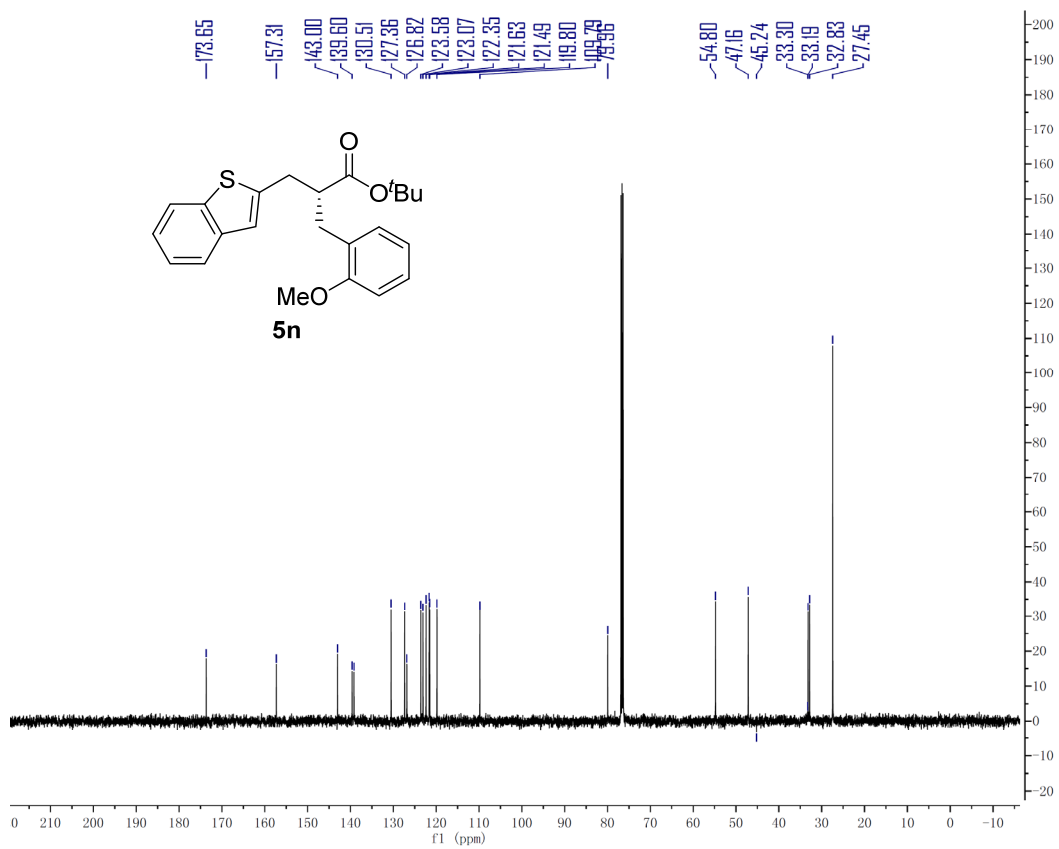

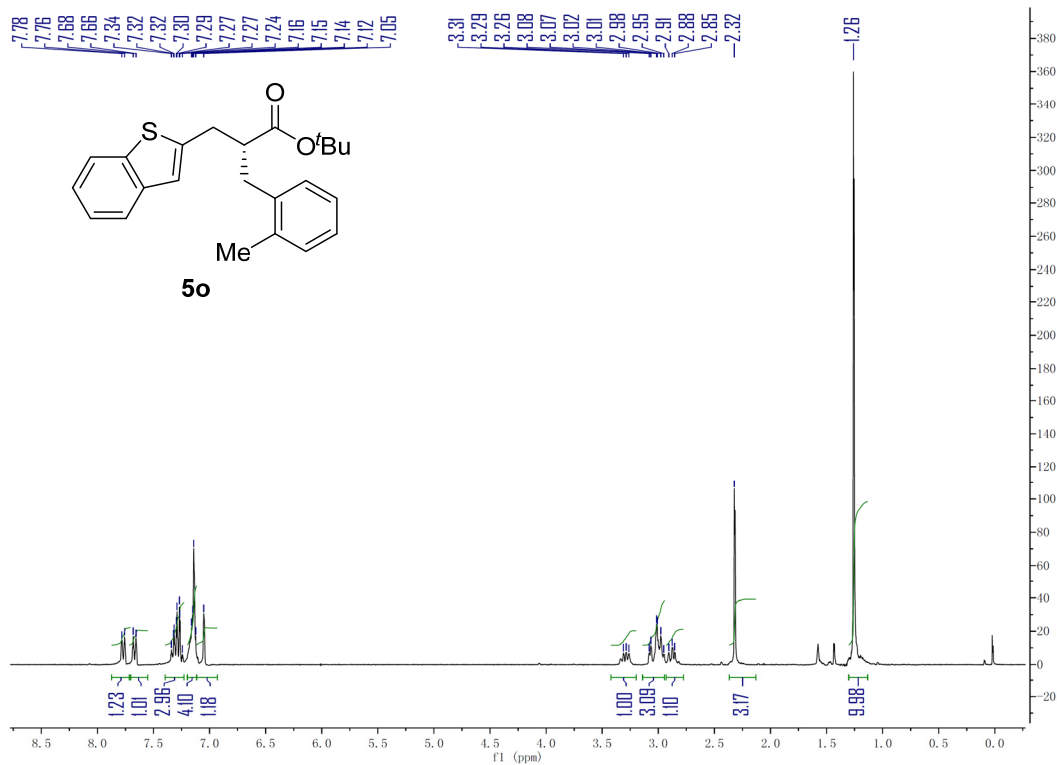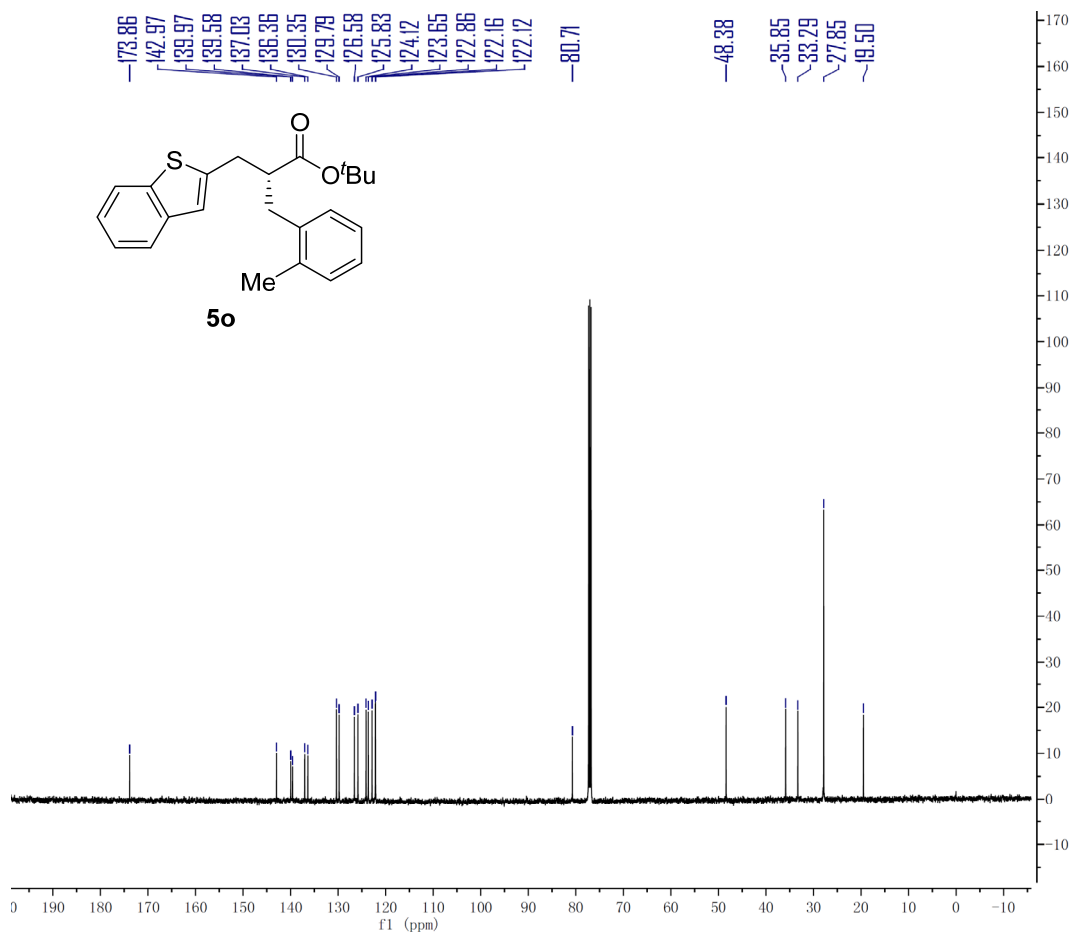

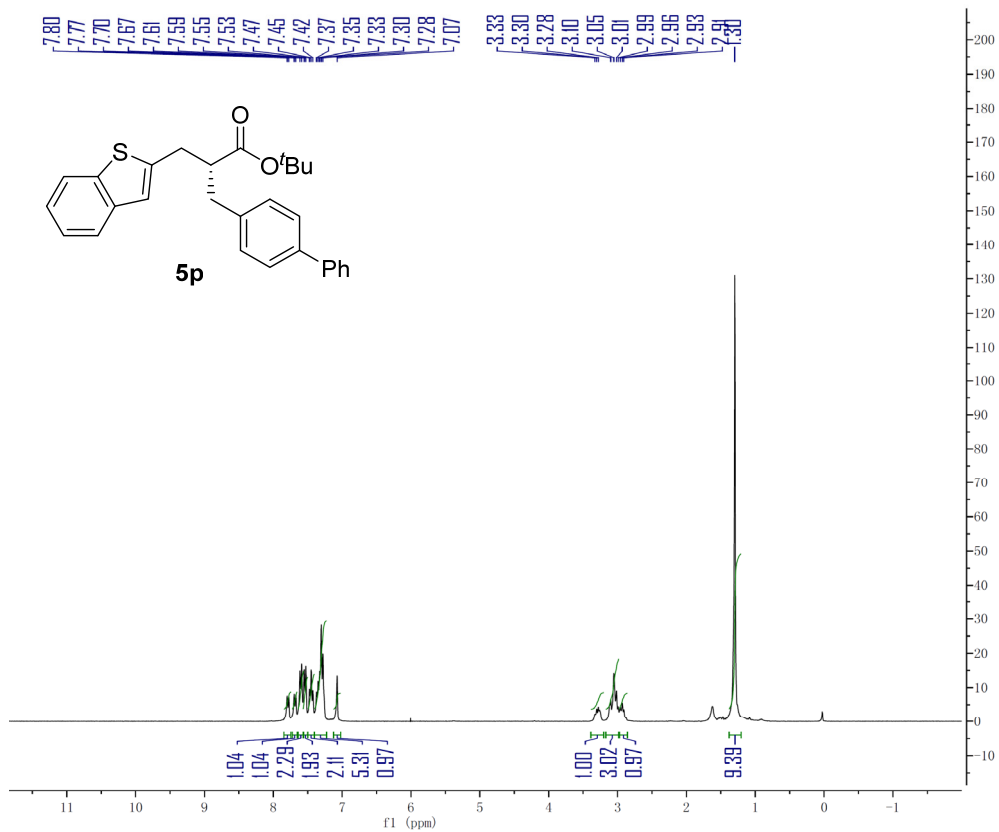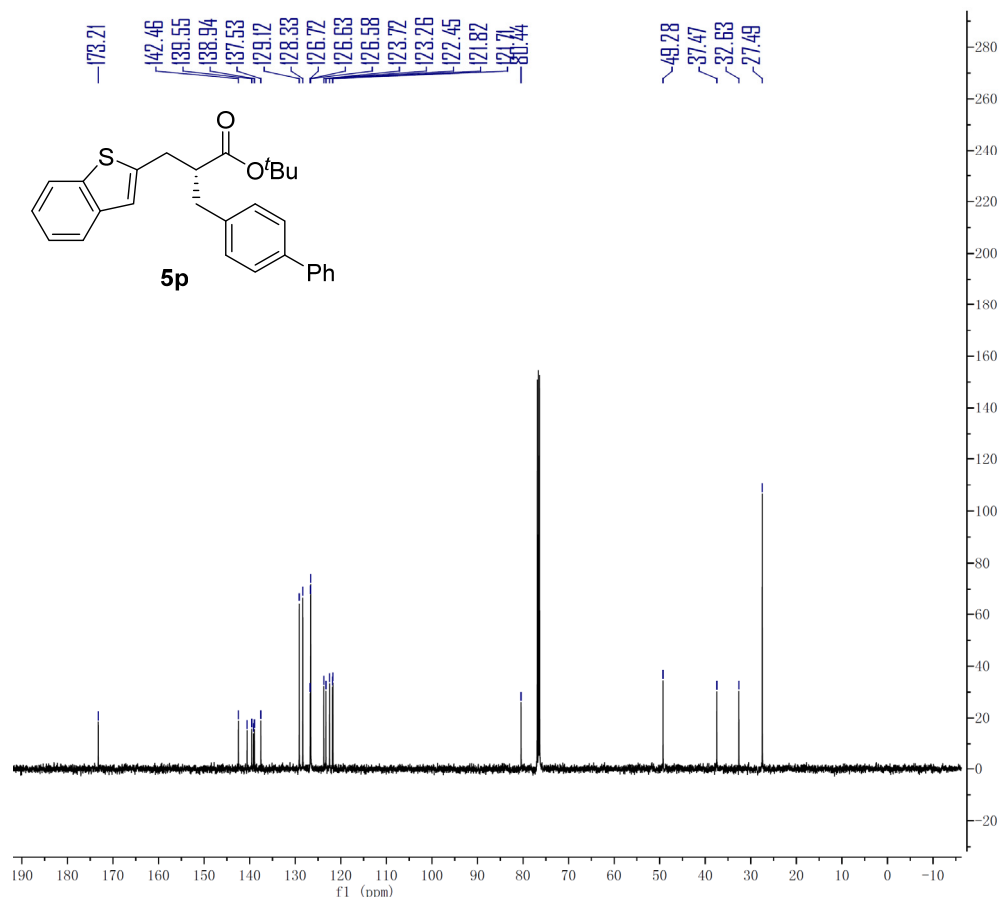



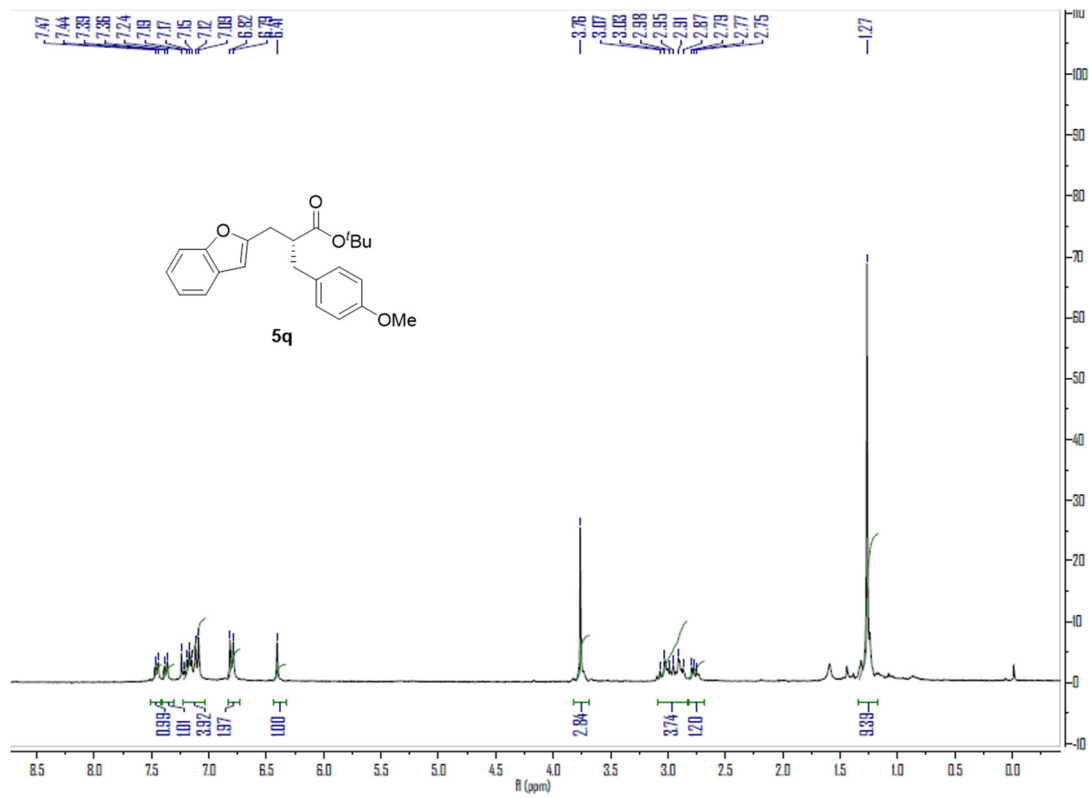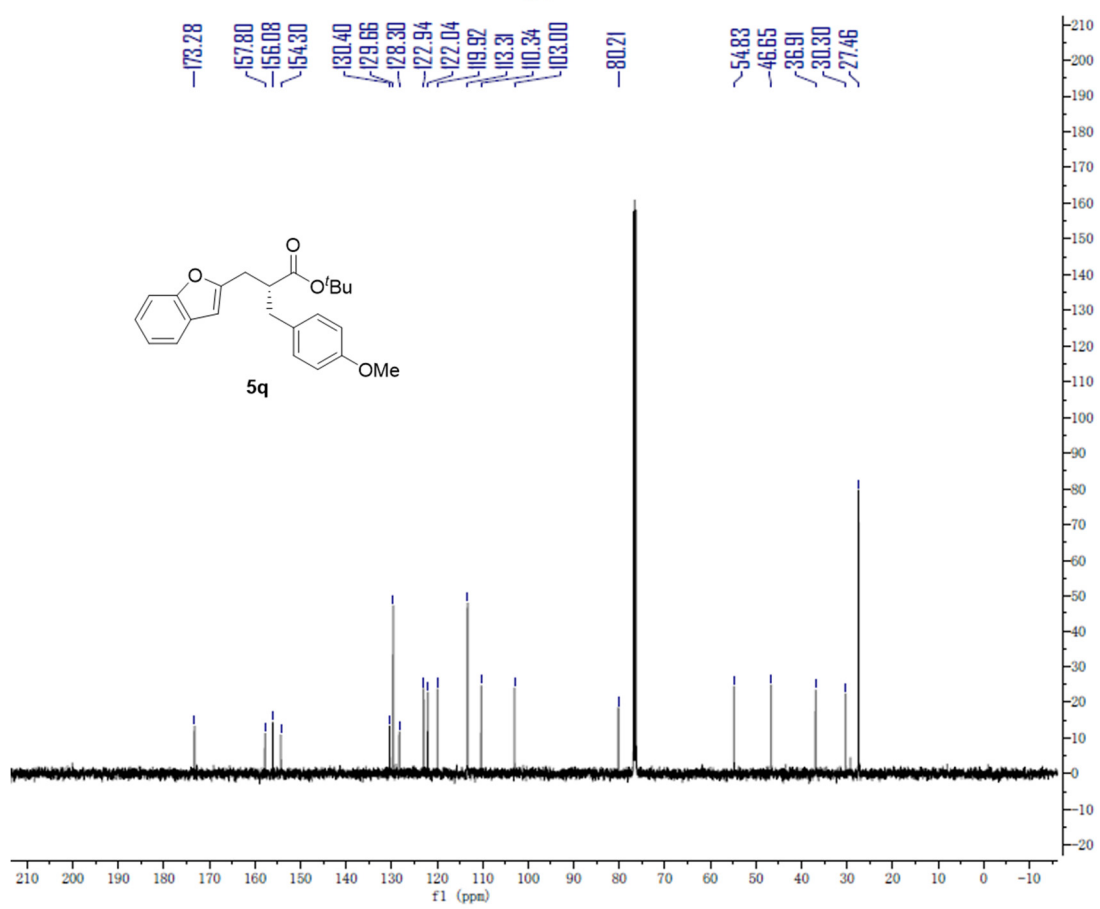

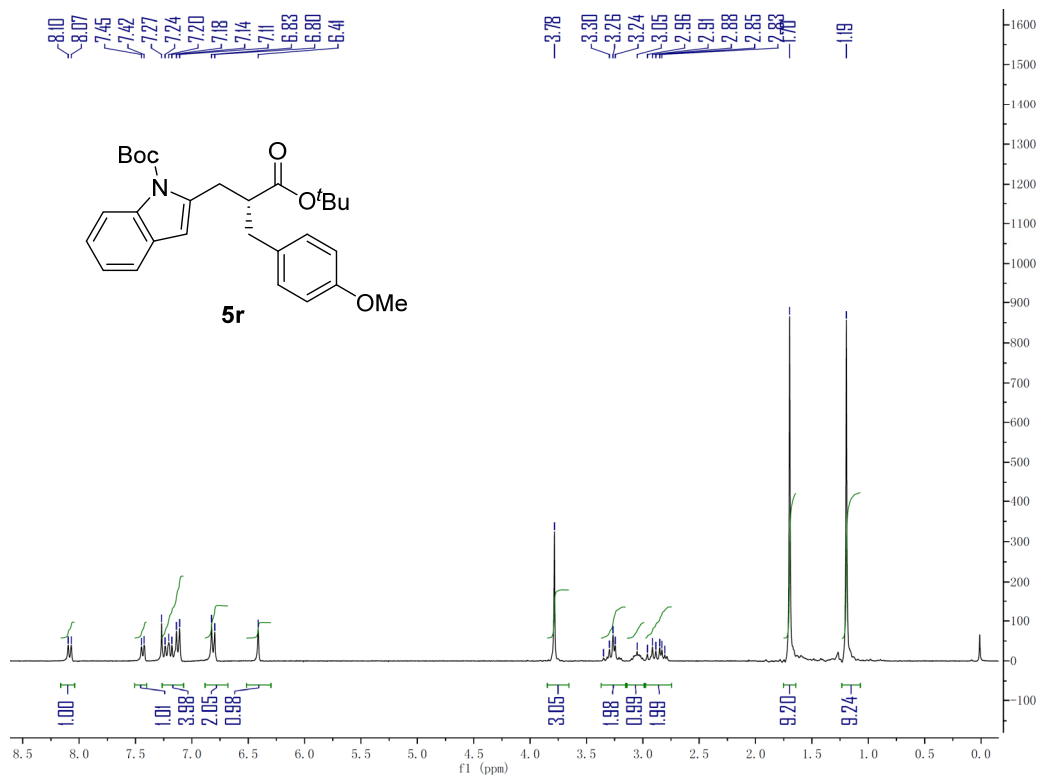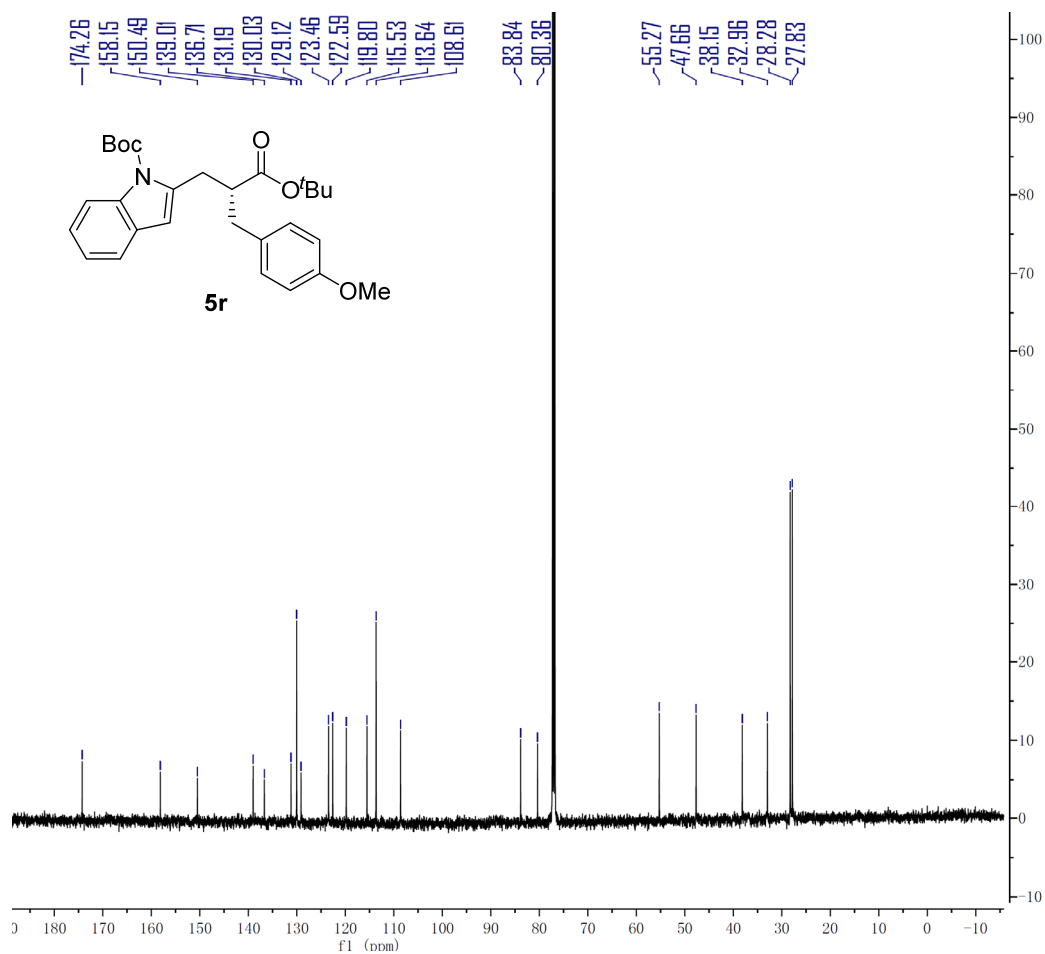

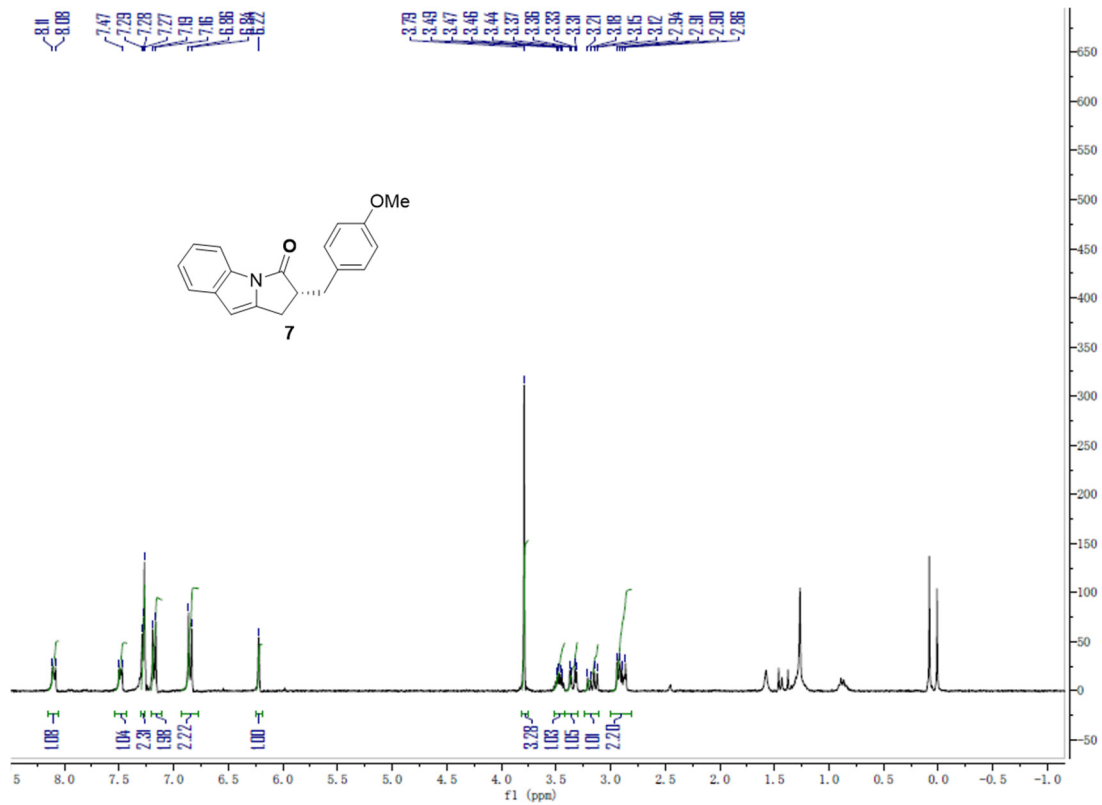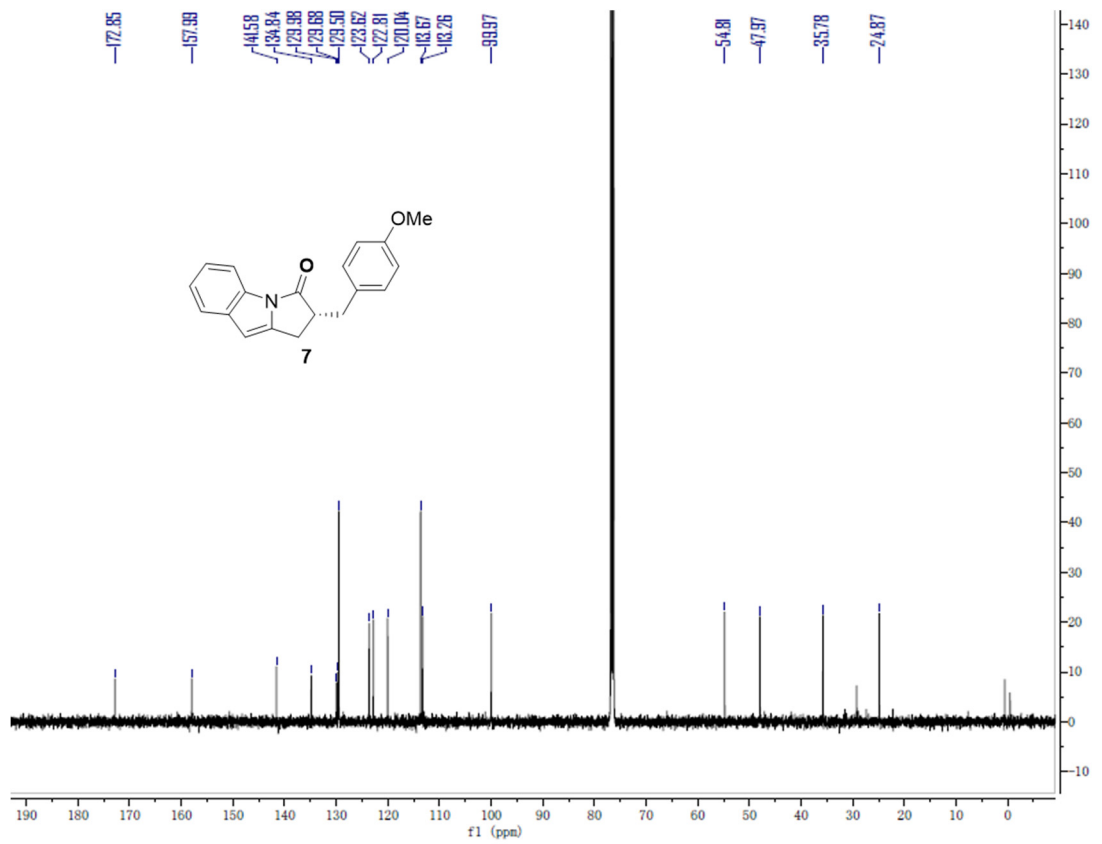

Supplement: d0ob00616e1.pdf [file d0ob00616e1.pdf]
